# Supplementary material
Source: PubMed Central journal article supplement (PMC5003666)

## Supplementary Data

### Synthesis and Biological Evaluation of Isomeric Methoxy Substitutions on Anti-Cancer Indolyl-Pyridinyl-Propenones: Effects on Potency and Mode of Activity

Christopher J. Trabbic<sup>a</sup>, Sage M. George<sup>b</sup>, Evan M. Alexander<sup>a,1</sup>, Shengnan Du<sup>b</sup>, Jennifer M. Offenbacher<sup>a</sup>, Emily J. Crissman<sup>a</sup>, Jean H. Overmeyer<sup>b</sup>, William A. Maltese<sup>b,\*</sup>, Paul W. Erhardt<sup>a,\*</sup>

<sup>a</sup>Center for Drug Design and Development, Department of Medicinal and Biological Chemistry, University of Toledo College of Pharmacy and Pharmaceutical Sciences, 2801 W. Bancroft Ave., Toledo, OH 43606

<sup>b</sup>Department of Biochemistry and Cancer Biology, University of Toledo College of Medicine and Life Sciences, 3000 Arlington Ave., Toledo, OH 43614

## Table of Contents

|                                                                                 |     |
|---------------------------------------------------------------------------------|-----|
| Figure S1 HPLC chromatograms for final targets and intermediate <b>8c</b> ..... | S3  |
| <sup>1</sup> H NMR spectrum of compound <b>5a</b> .....                         | S4  |
| <sup>1</sup> H NMR spectrum of compound <b>5b</b> .....                         | S5  |
| <sup>1</sup> H NMR spectrum of compound <b>5c</b> .....                         | S6  |
| <sup>1</sup> H NMR spectrum of compound <b>5d</b> .....                         | S7  |
| <sup>1</sup> H NMR spectrum of compound <b>6b</b> .....                         | S8  |
| <sup>1</sup> H NMR spectrum of compound <b>6d</b> .....                         | S9  |
| <sup>1</sup> H NMR spectrum of compound <b>7a</b> .....                         | S10 |
| <sup>1</sup> H NMR spectrum of compound <b>7b-Scheme 2</b> .....                | S11 |
| <sup>1</sup> H NMR spectrum of compound <b>7c</b> .....                         | S12 |
| <sup>1</sup> H NMR spectrum of compound <b>7d</b> .....                         | S13 |
| <sup>1</sup> H NMR spectrum of compound <b>8a</b> .....                         | S14 |
| <sup>1</sup> H NMR spectrum of compound <b>8b</b> .....                         | S15 |
| <sup>1</sup> H NMR spectrum of compound <b>8b-Scheme 2</b> .....                | S16 |
| <sup>1</sup> H NMR spectrum of compound <b>8c</b> .....                         | S17 |

|                                                                   |     |
|-------------------------------------------------------------------|-----|
| <sup>1</sup> H NMR spectrum of compound <b>8d</b> .....           | S18 |
| <sup>1</sup> H NMR spectrum of compound <b>9a</b> .....           | S19 |
| <sup>13</sup> C NMR spectrum of compound <b>9a</b> .....          | S20 |
| <sup>1</sup> H NMR spectrum of compound <b>9b</b> .....           | S21 |
| <sup>13</sup> C NMR spectrum of compound <b>9b</b> .....          | S22 |
| <sup>1</sup> H NMR spectrum of compound <b>9b-Scheme 2</b> .....  | S23 |
| <sup>13</sup> C NMR spectrum of compound <b>9b-Scheme 2</b> ..... | S24 |
| <sup>1</sup> H NMR spectrum of compound <b>9c</b> .....           | S25 |
| <sup>13</sup> C NMR spectrum of compound <b>9c</b> .....          | S26 |
| <sup>1</sup> H NMR spectrum of compound <b>9d</b> .....           | S27 |
| <sup>13</sup> C NMR spectrum of compound <b>9d</b> .....          | S28 |
| <sup>1</sup> H NMR spectrum of compound <b>11</b> .....           | S29 |
| <sup>1</sup> H NMR spectrum of compound <b>13</b> .....           | S30 |
| <sup>1</sup> H NMR spectrum of compound <b>14</b> .....           | S31 |
| <sup>1</sup> H NMR spectrum of compound <b>15</b> .....           | S32 |
| <sup>13</sup> C NMR spectrum of compound <b>15</b> .....          | S33 |
| <sup>1</sup> H NMR spectrum of compound <b>17</b> .....           | S34 |
| <sup>13</sup> C NMR spectrum of compound <b>17</b> .....          | S35 |
| <sup>1</sup> H NMR spectrum of compound <b>18</b> .....           | S36 |
| <sup>13</sup> C NMR spectrum of compound <b>18</b> .....          | S37 |
| <sup>1</sup> H NMR spectrum of compound <b>19</b> .....           | S38 |
| <sup>13</sup> C NMR spectrum of compound <b>19</b> .....          | S39 |

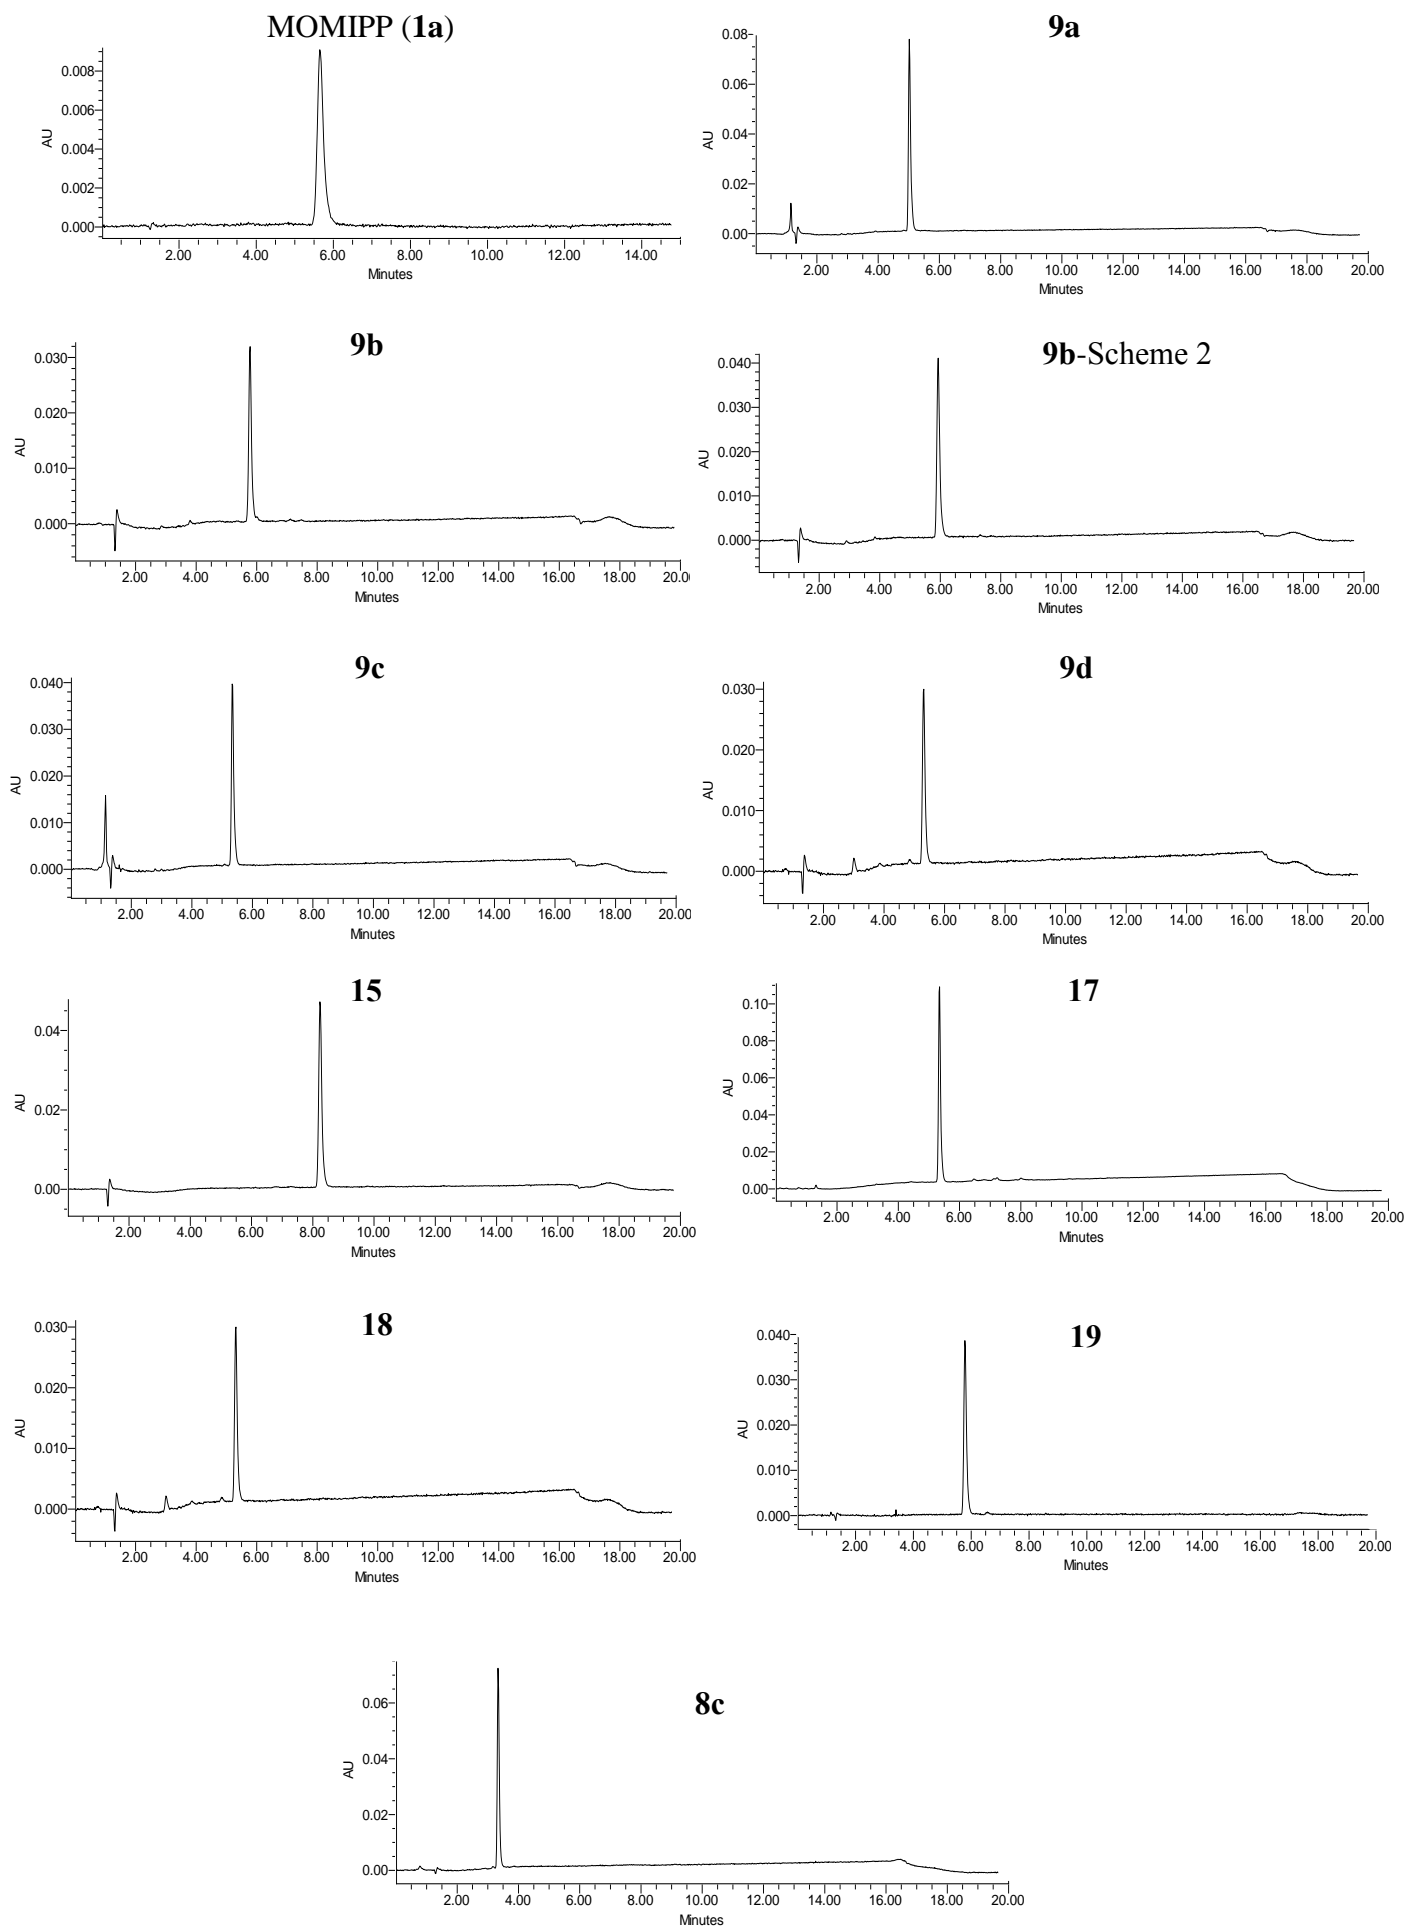

**Figure S1.** HPLC chromatograms for final targets and intermediate **8c**.

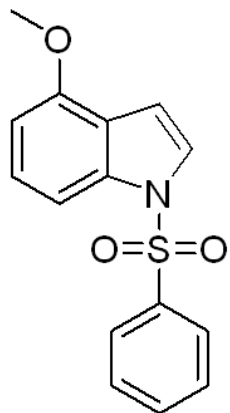

**5a**

$^1\text{H NMR}$  (600 MHz,  $\text{CDCl}_3$ )

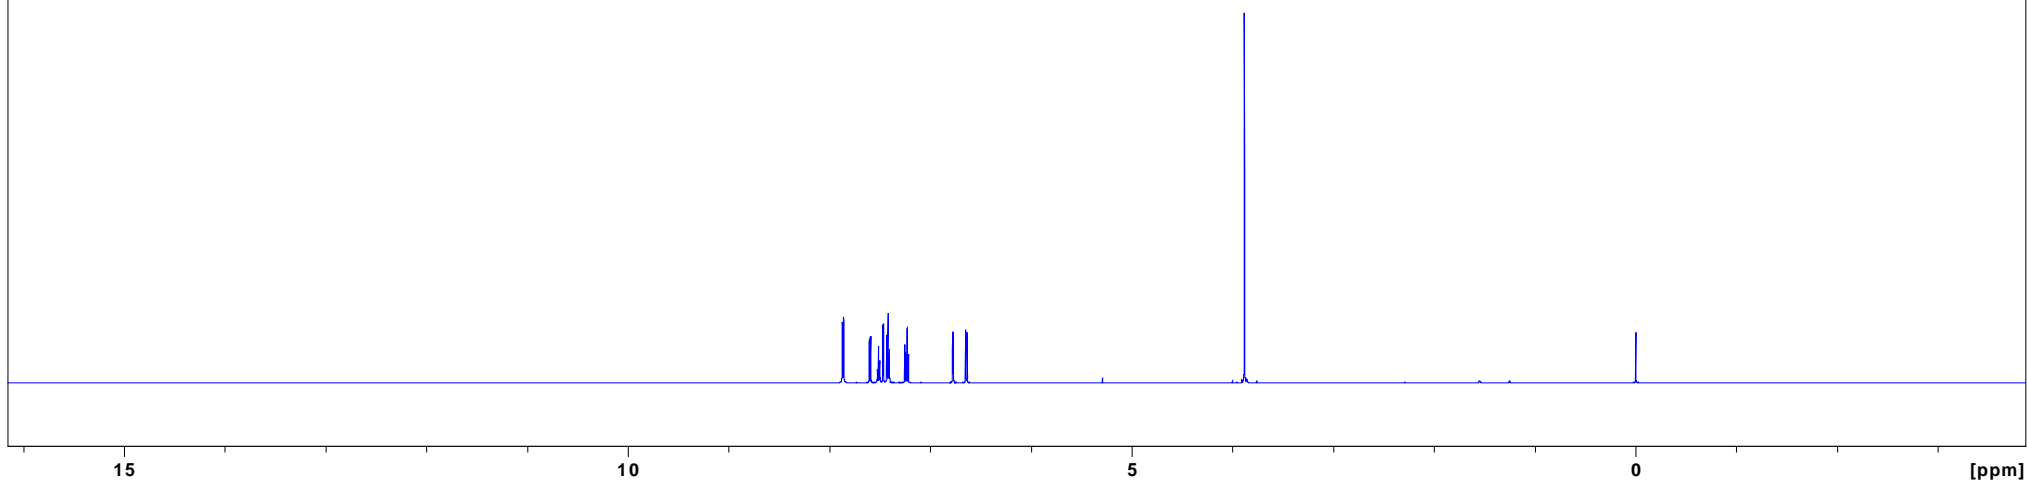

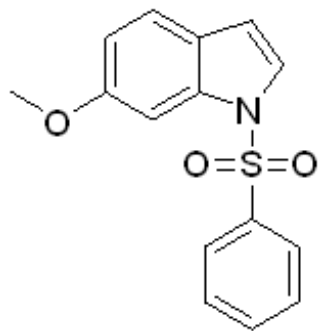

**5b**

$^1\text{H}$  NMR (600 MHz,  $\text{CDCl}_3$ )

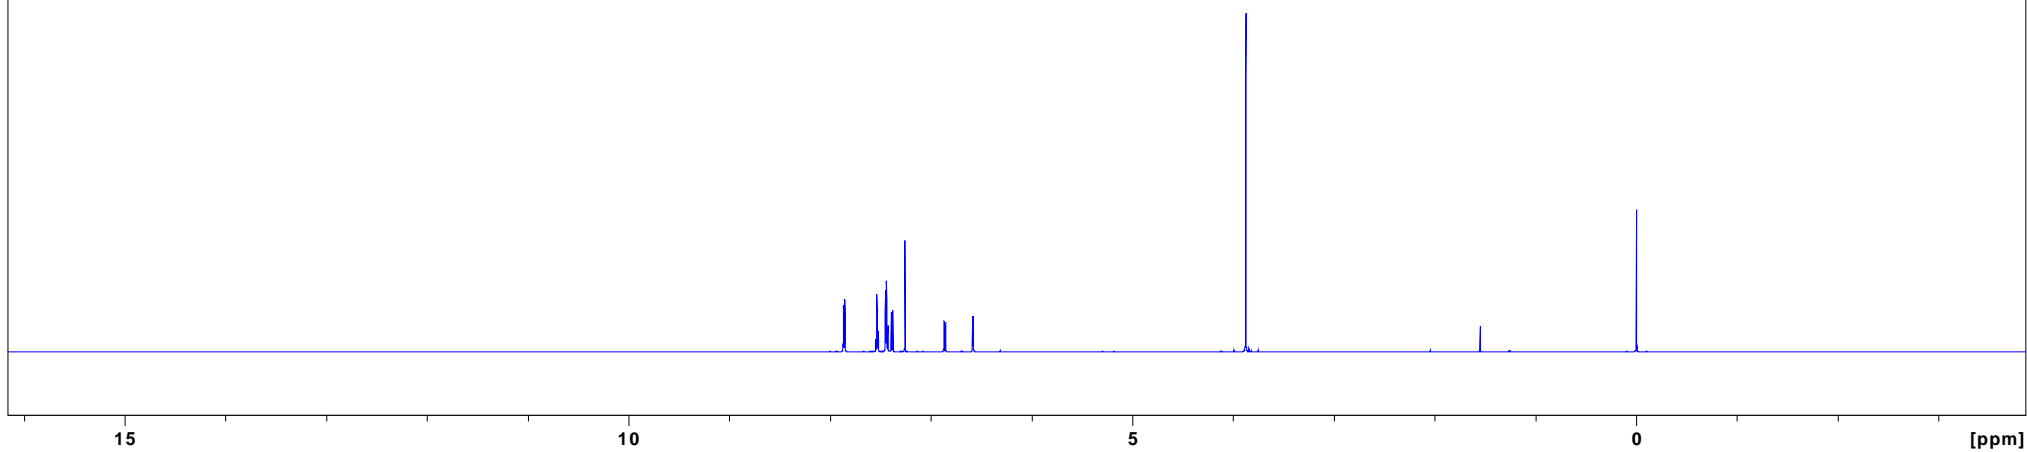

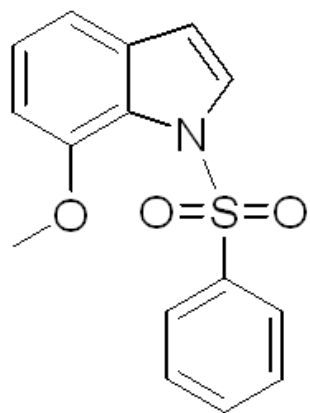

**5c**

$^1\text{H NMR}$  (600 MHz,  $\text{CDCl}_3$ )

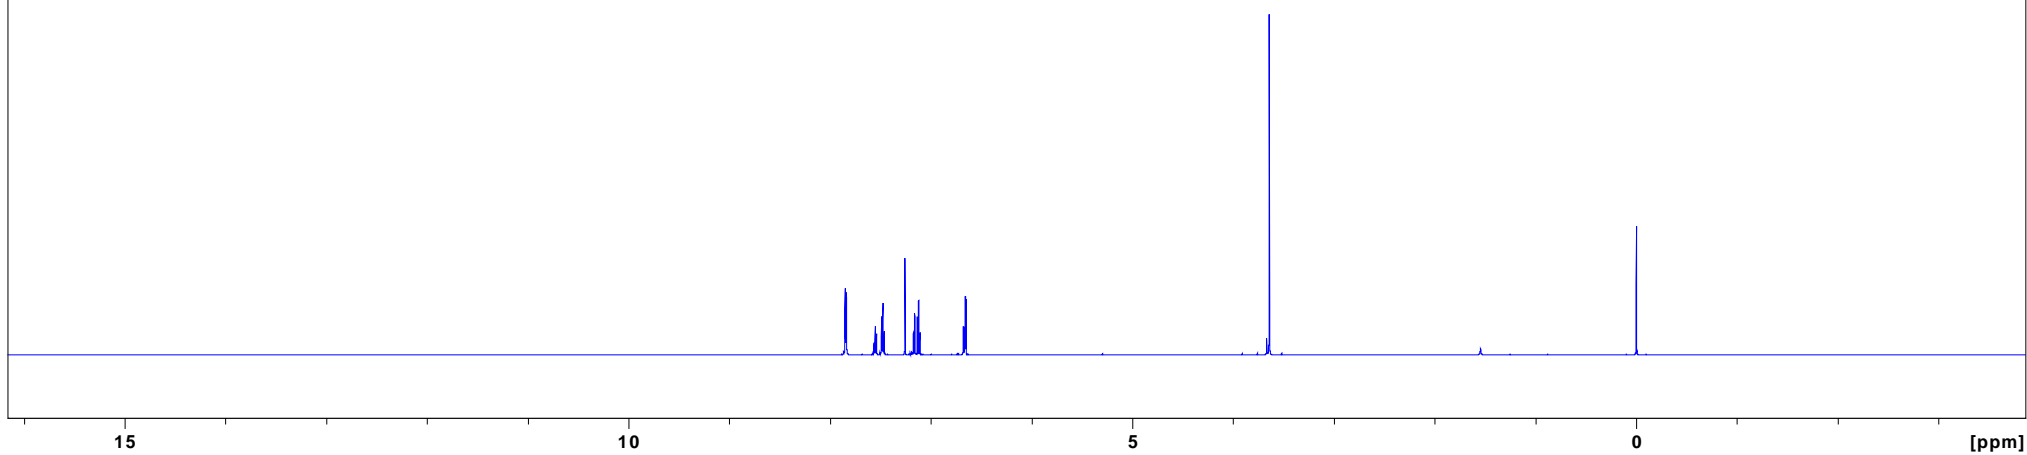

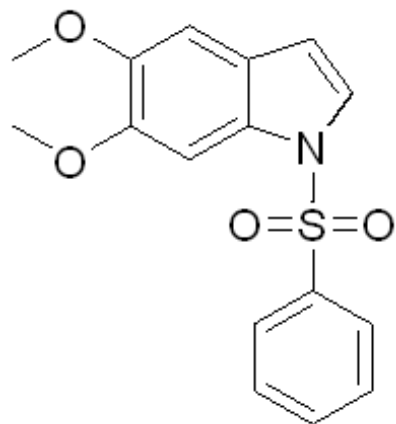

**5d**

$^1\text{H}$  NMR (600 MHz,  $\text{CDCl}_3$ )

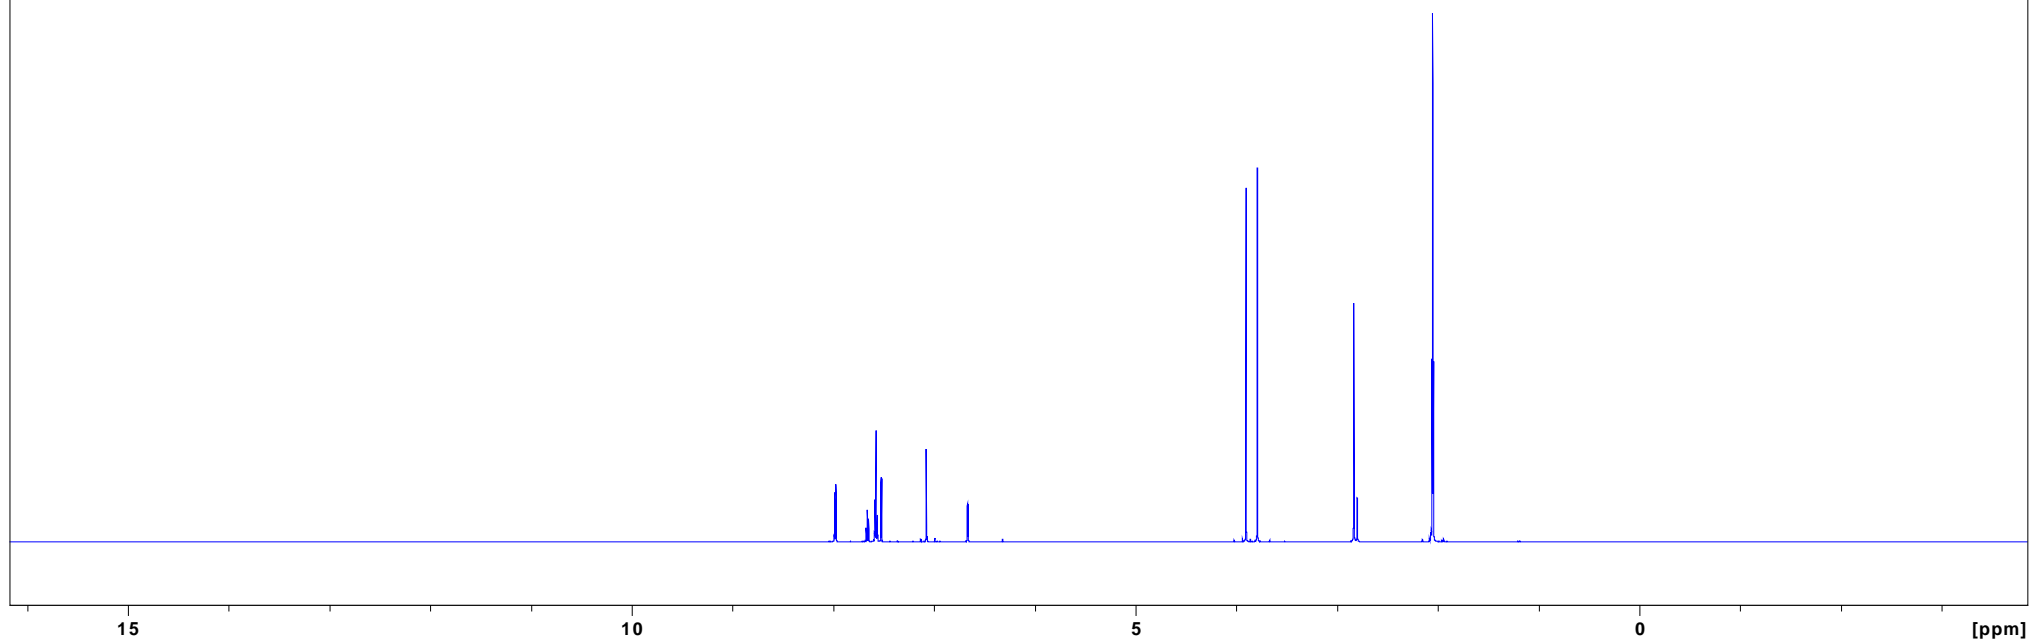

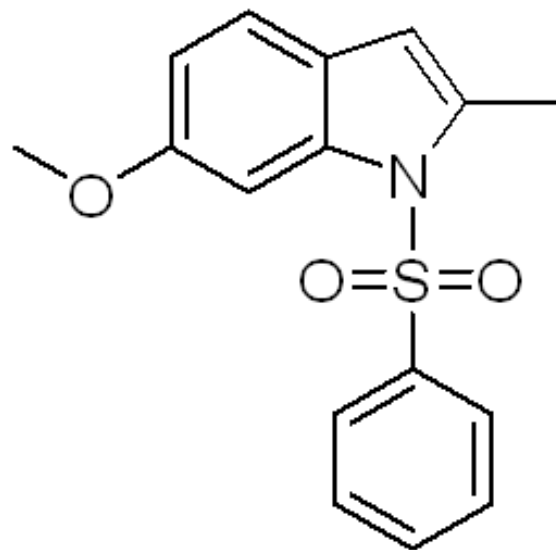

**6b**

$^1\text{H}$  NMR (600 MHz,  $\text{CDCl}_3$ )

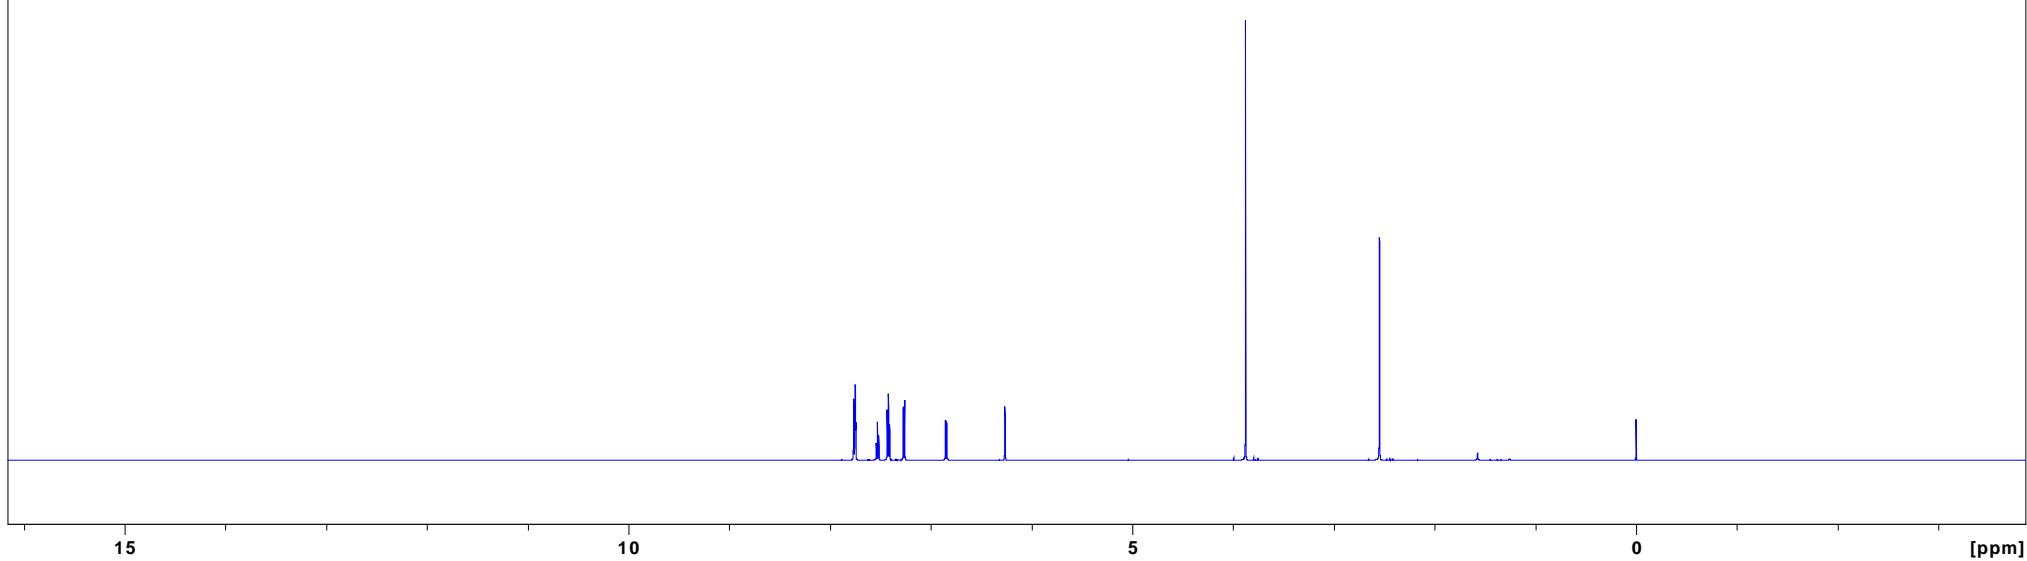



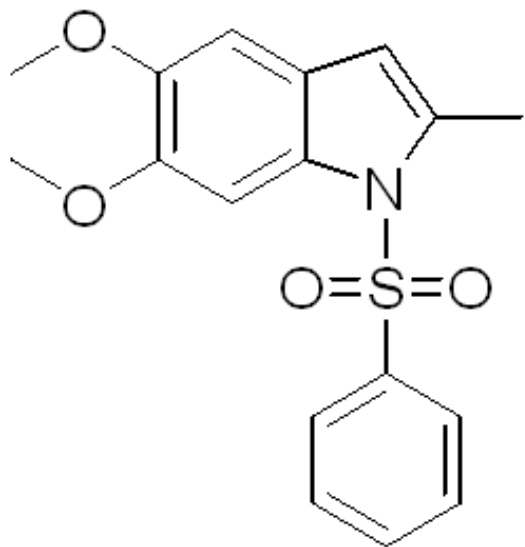

**6d**

$^1\text{H}$  NMR (600 MHz,  $d_6$ -acetone)

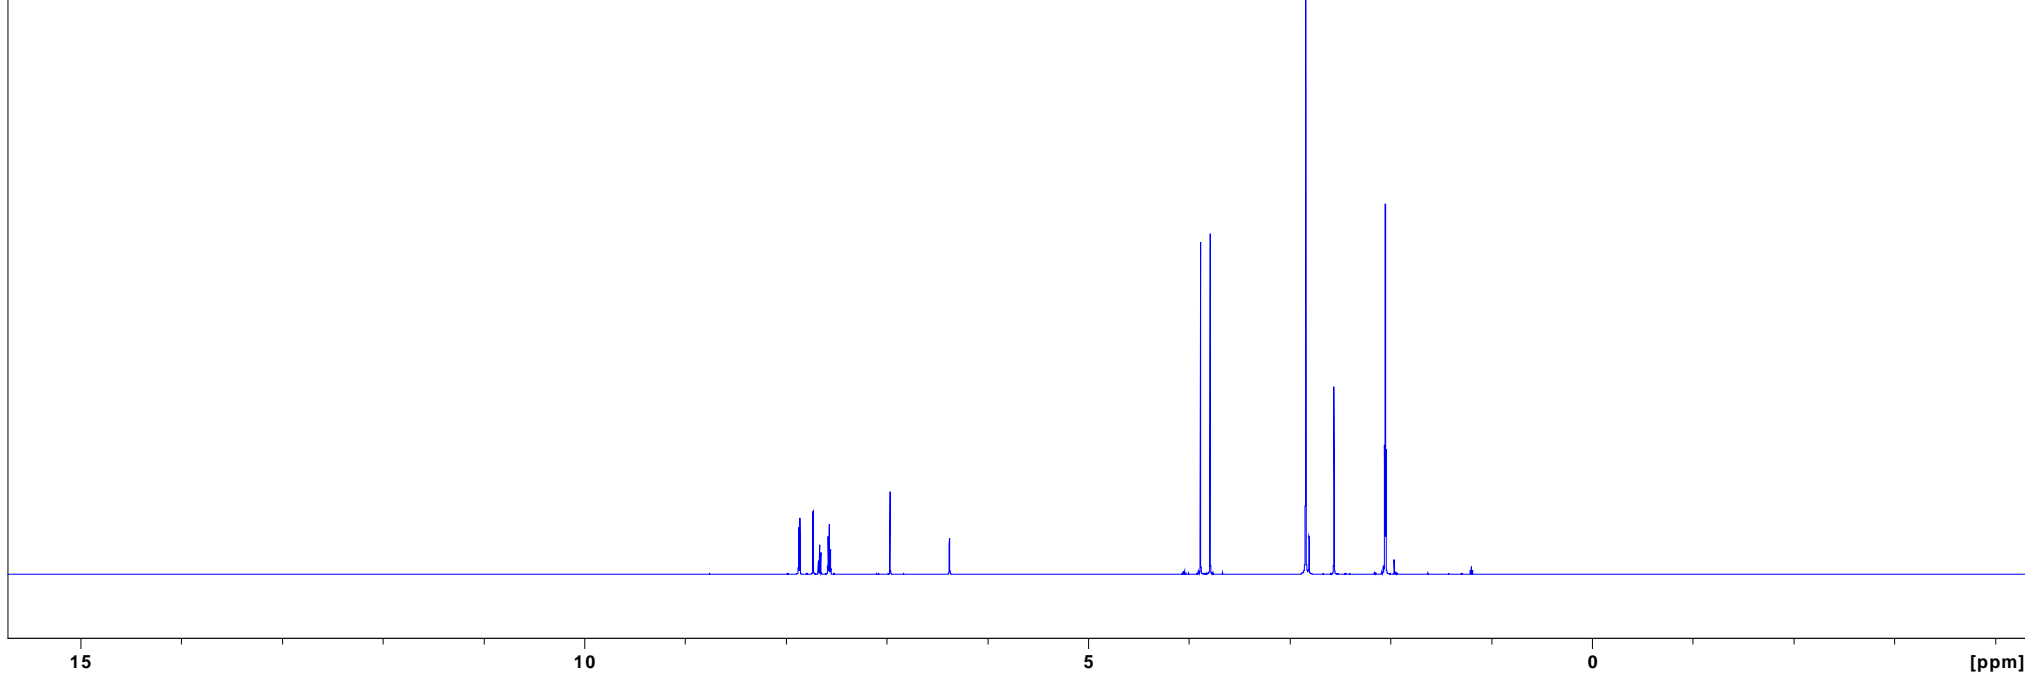

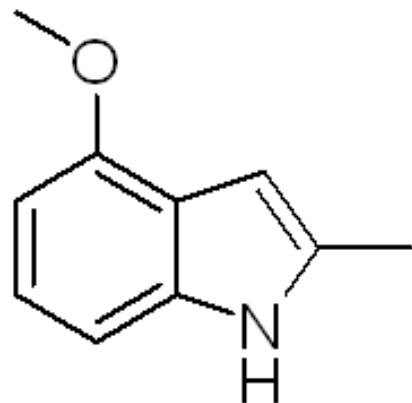

**7a**

$^1\text{H}$  NMR (600 MHz,  $\text{CDCl}_3$ )

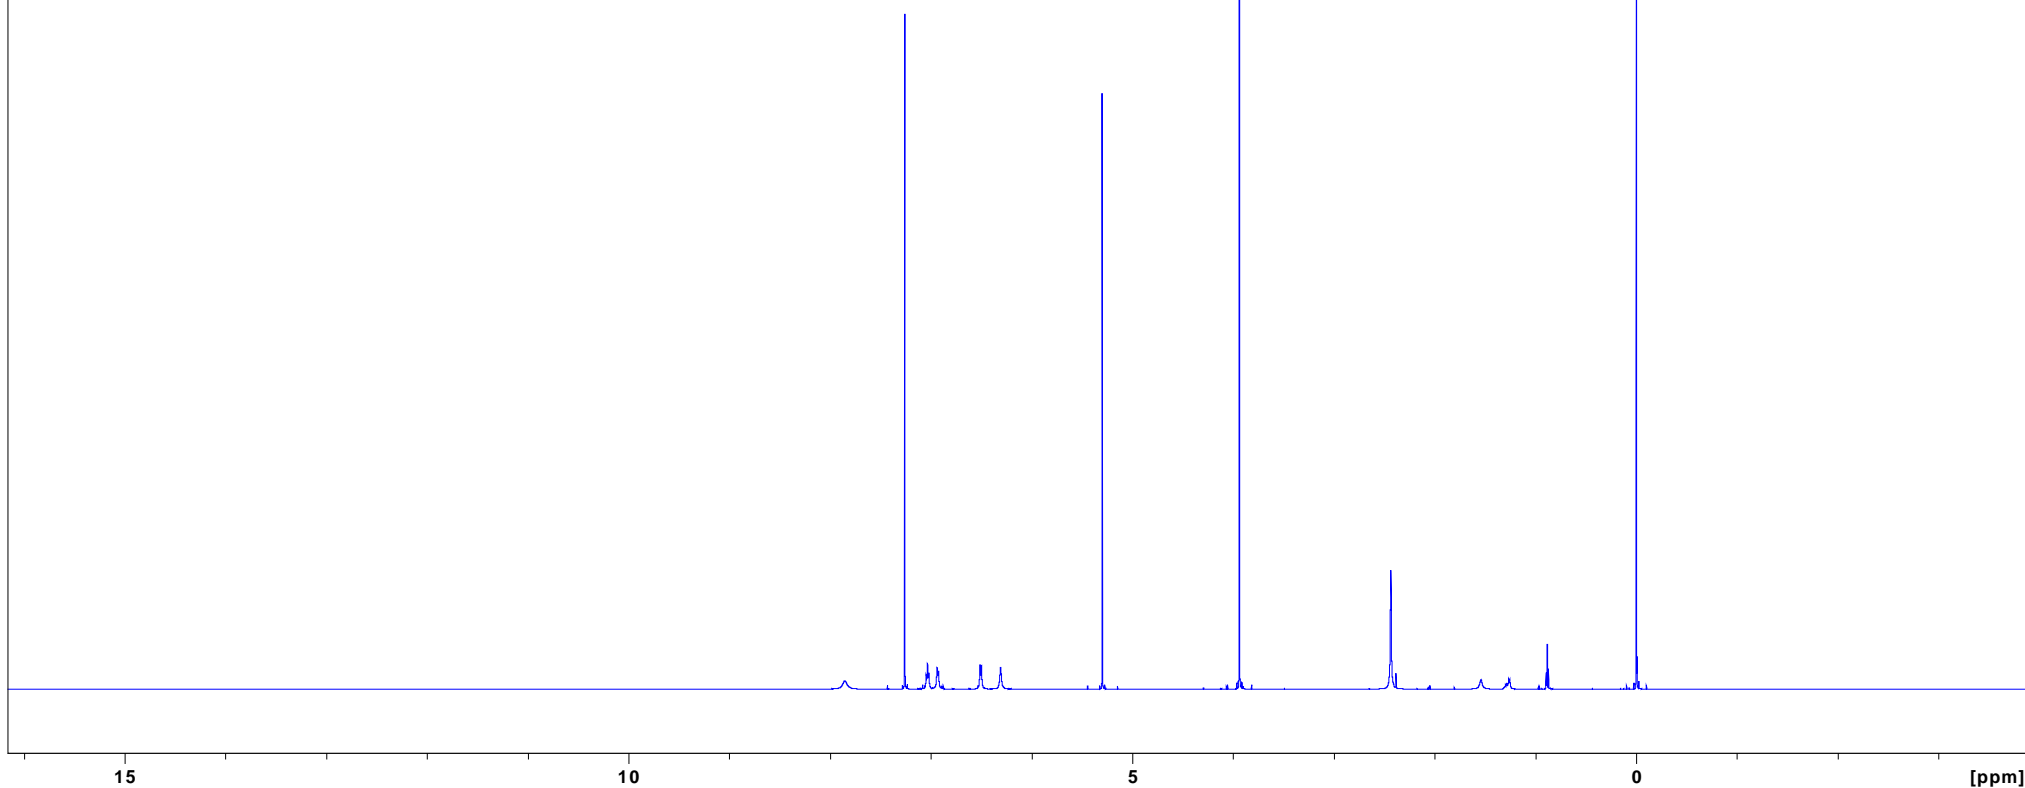

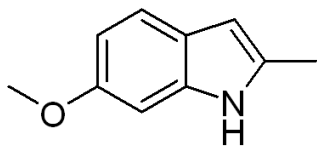

**7b**

Scheme 2

$^1\text{H}$  NMR (600 MHz,  $d_6$ -acetone)

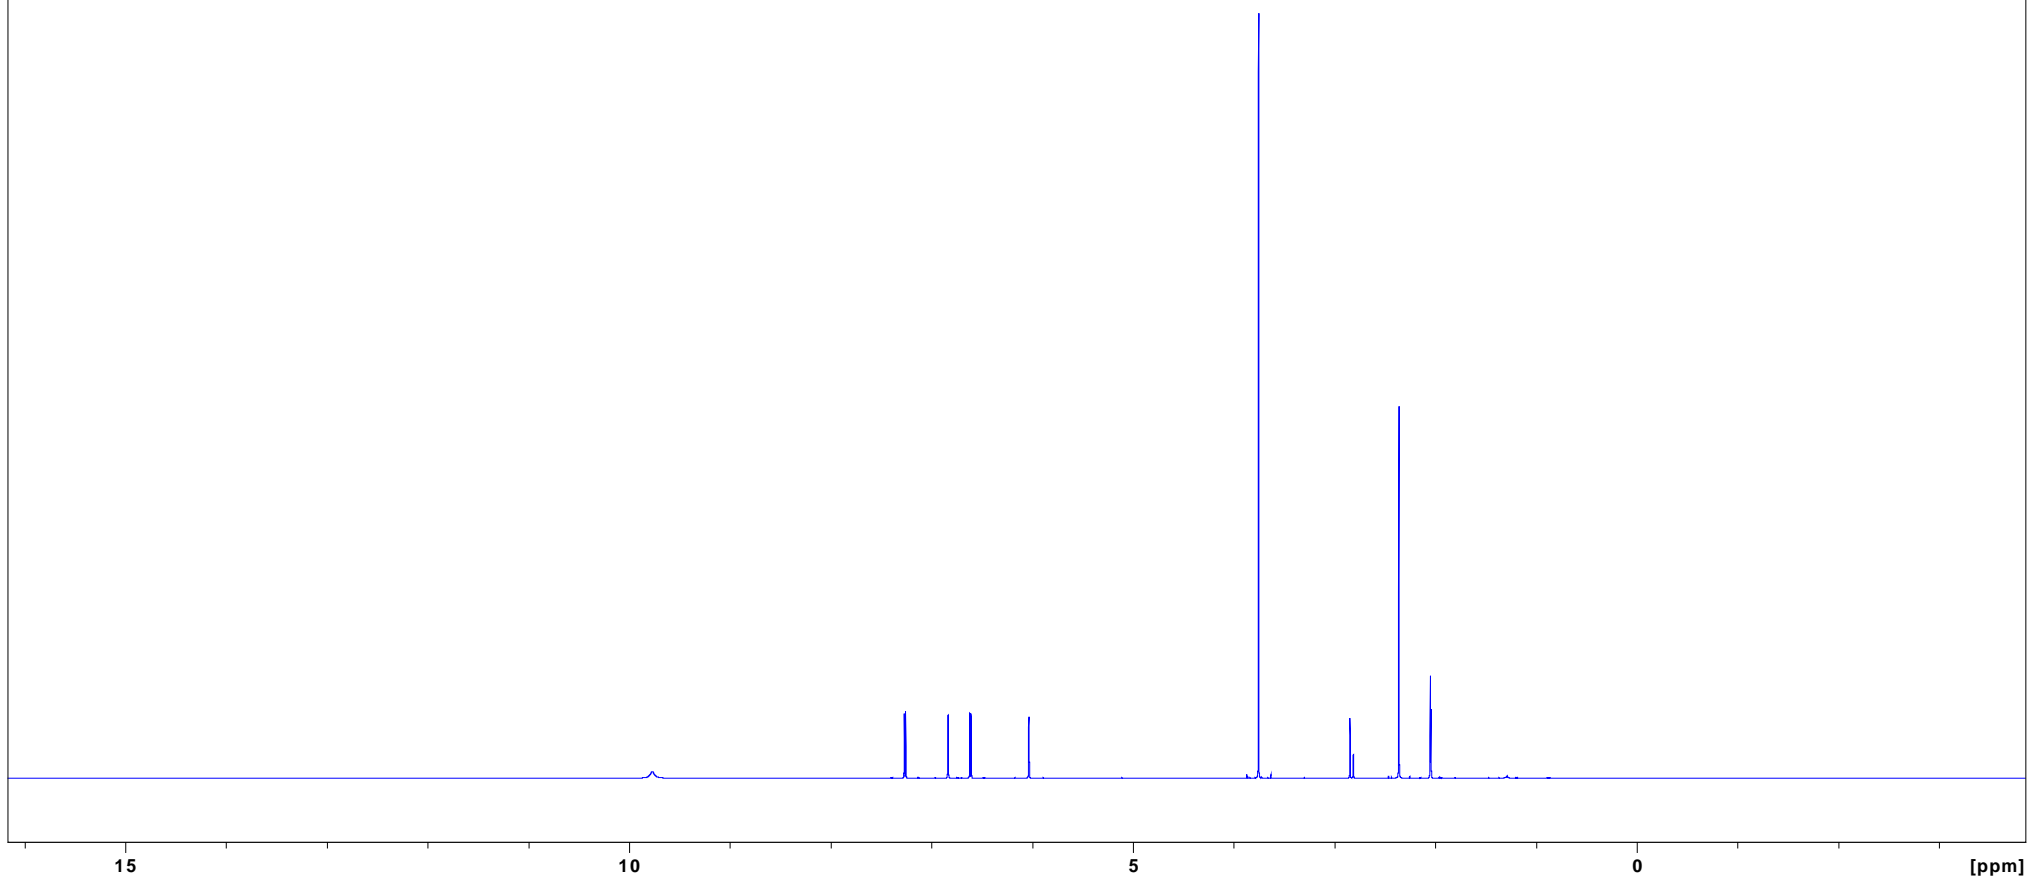

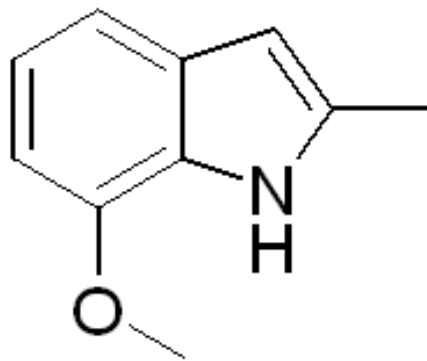

**7c**

<sup>1</sup>H NMR (600 MHz, CDCl<sub>3</sub>)

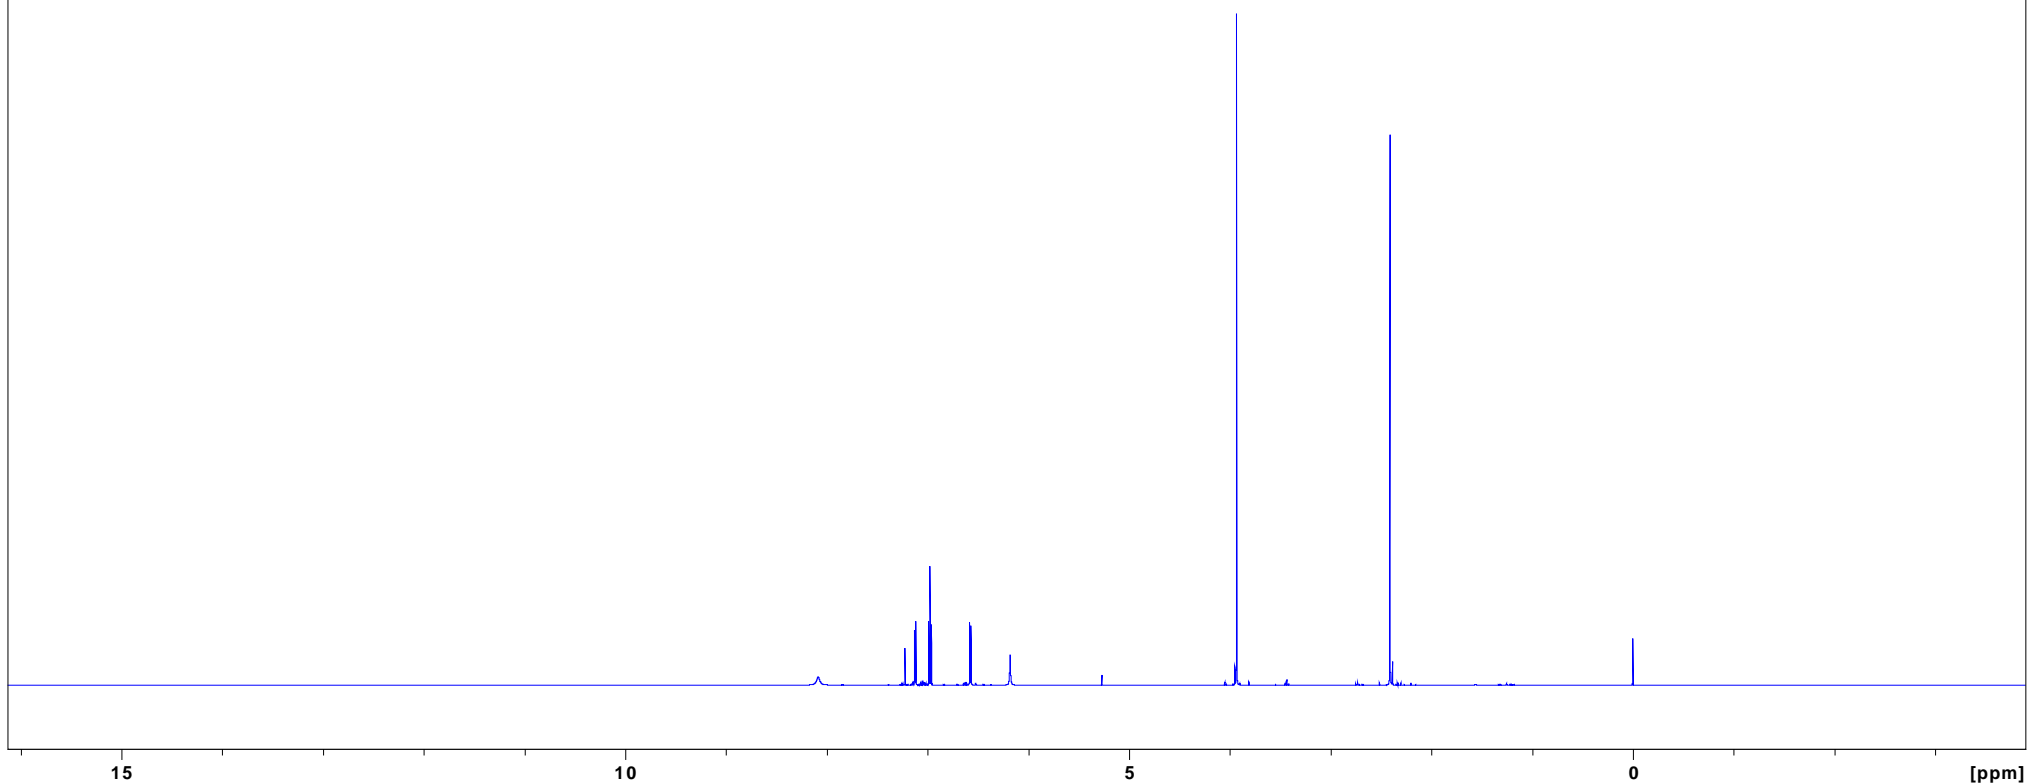

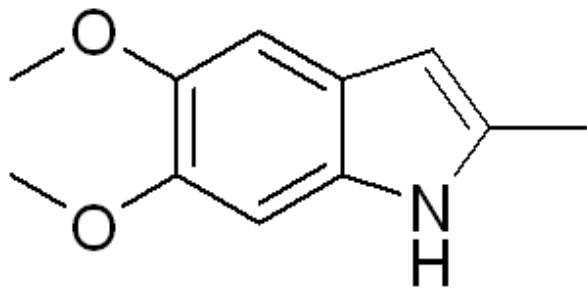

**7d**

$^1\text{H}$  NMR (600 MHz,  $d_6$ -acetone)

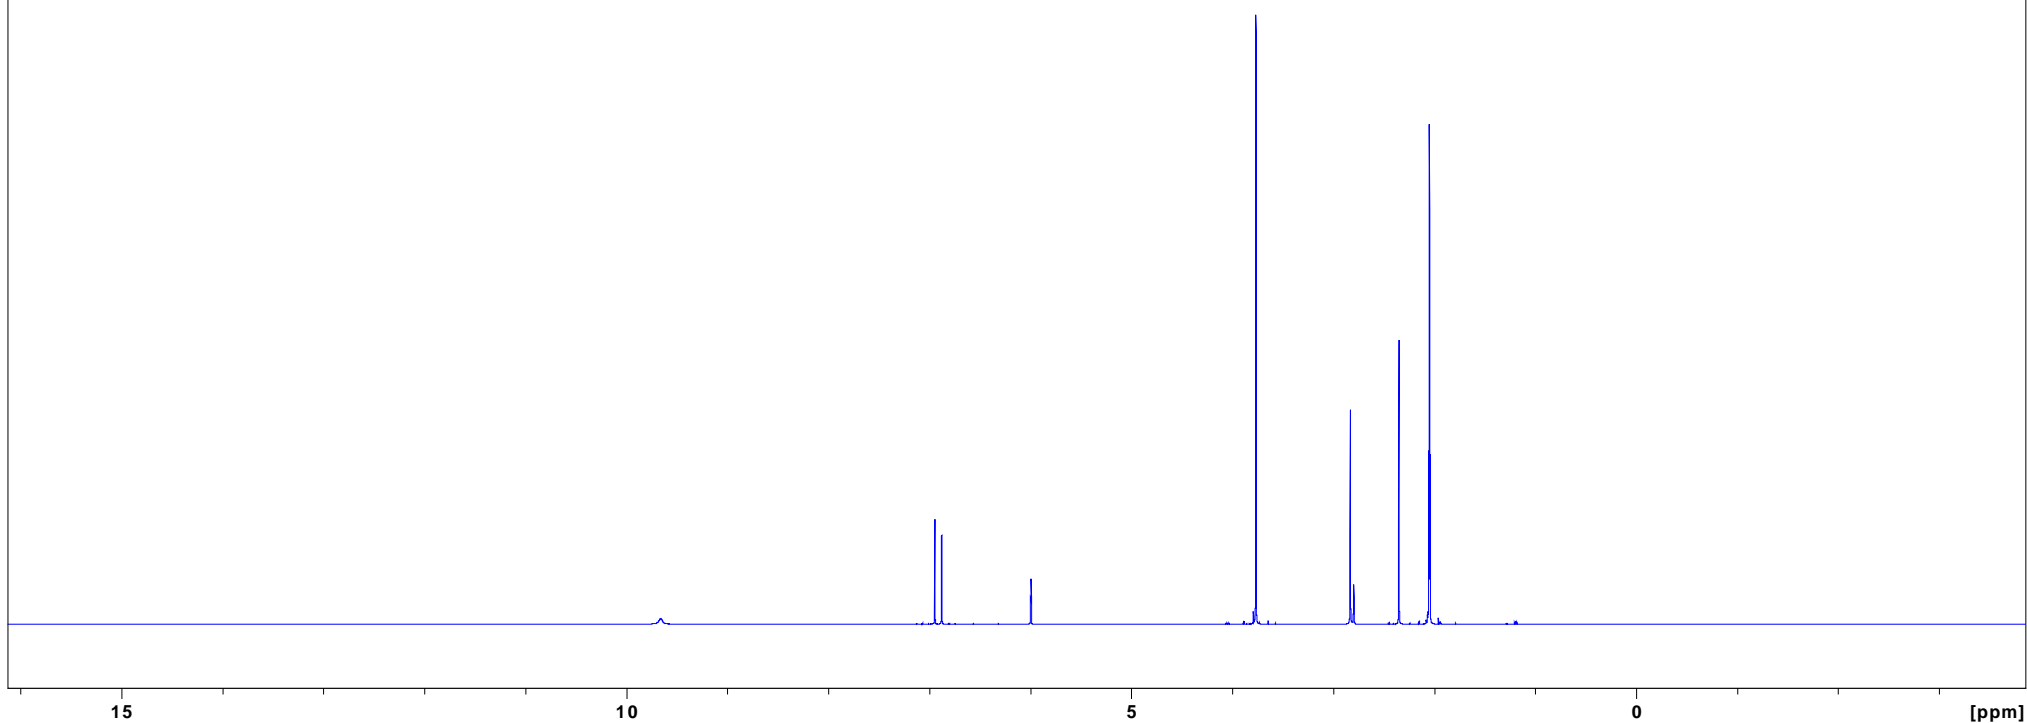

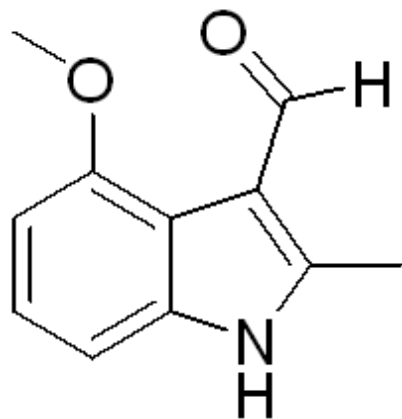

**8a**

<sup>1</sup>H NMR (600 MHz, *d*<sub>6</sub>-DMSO)

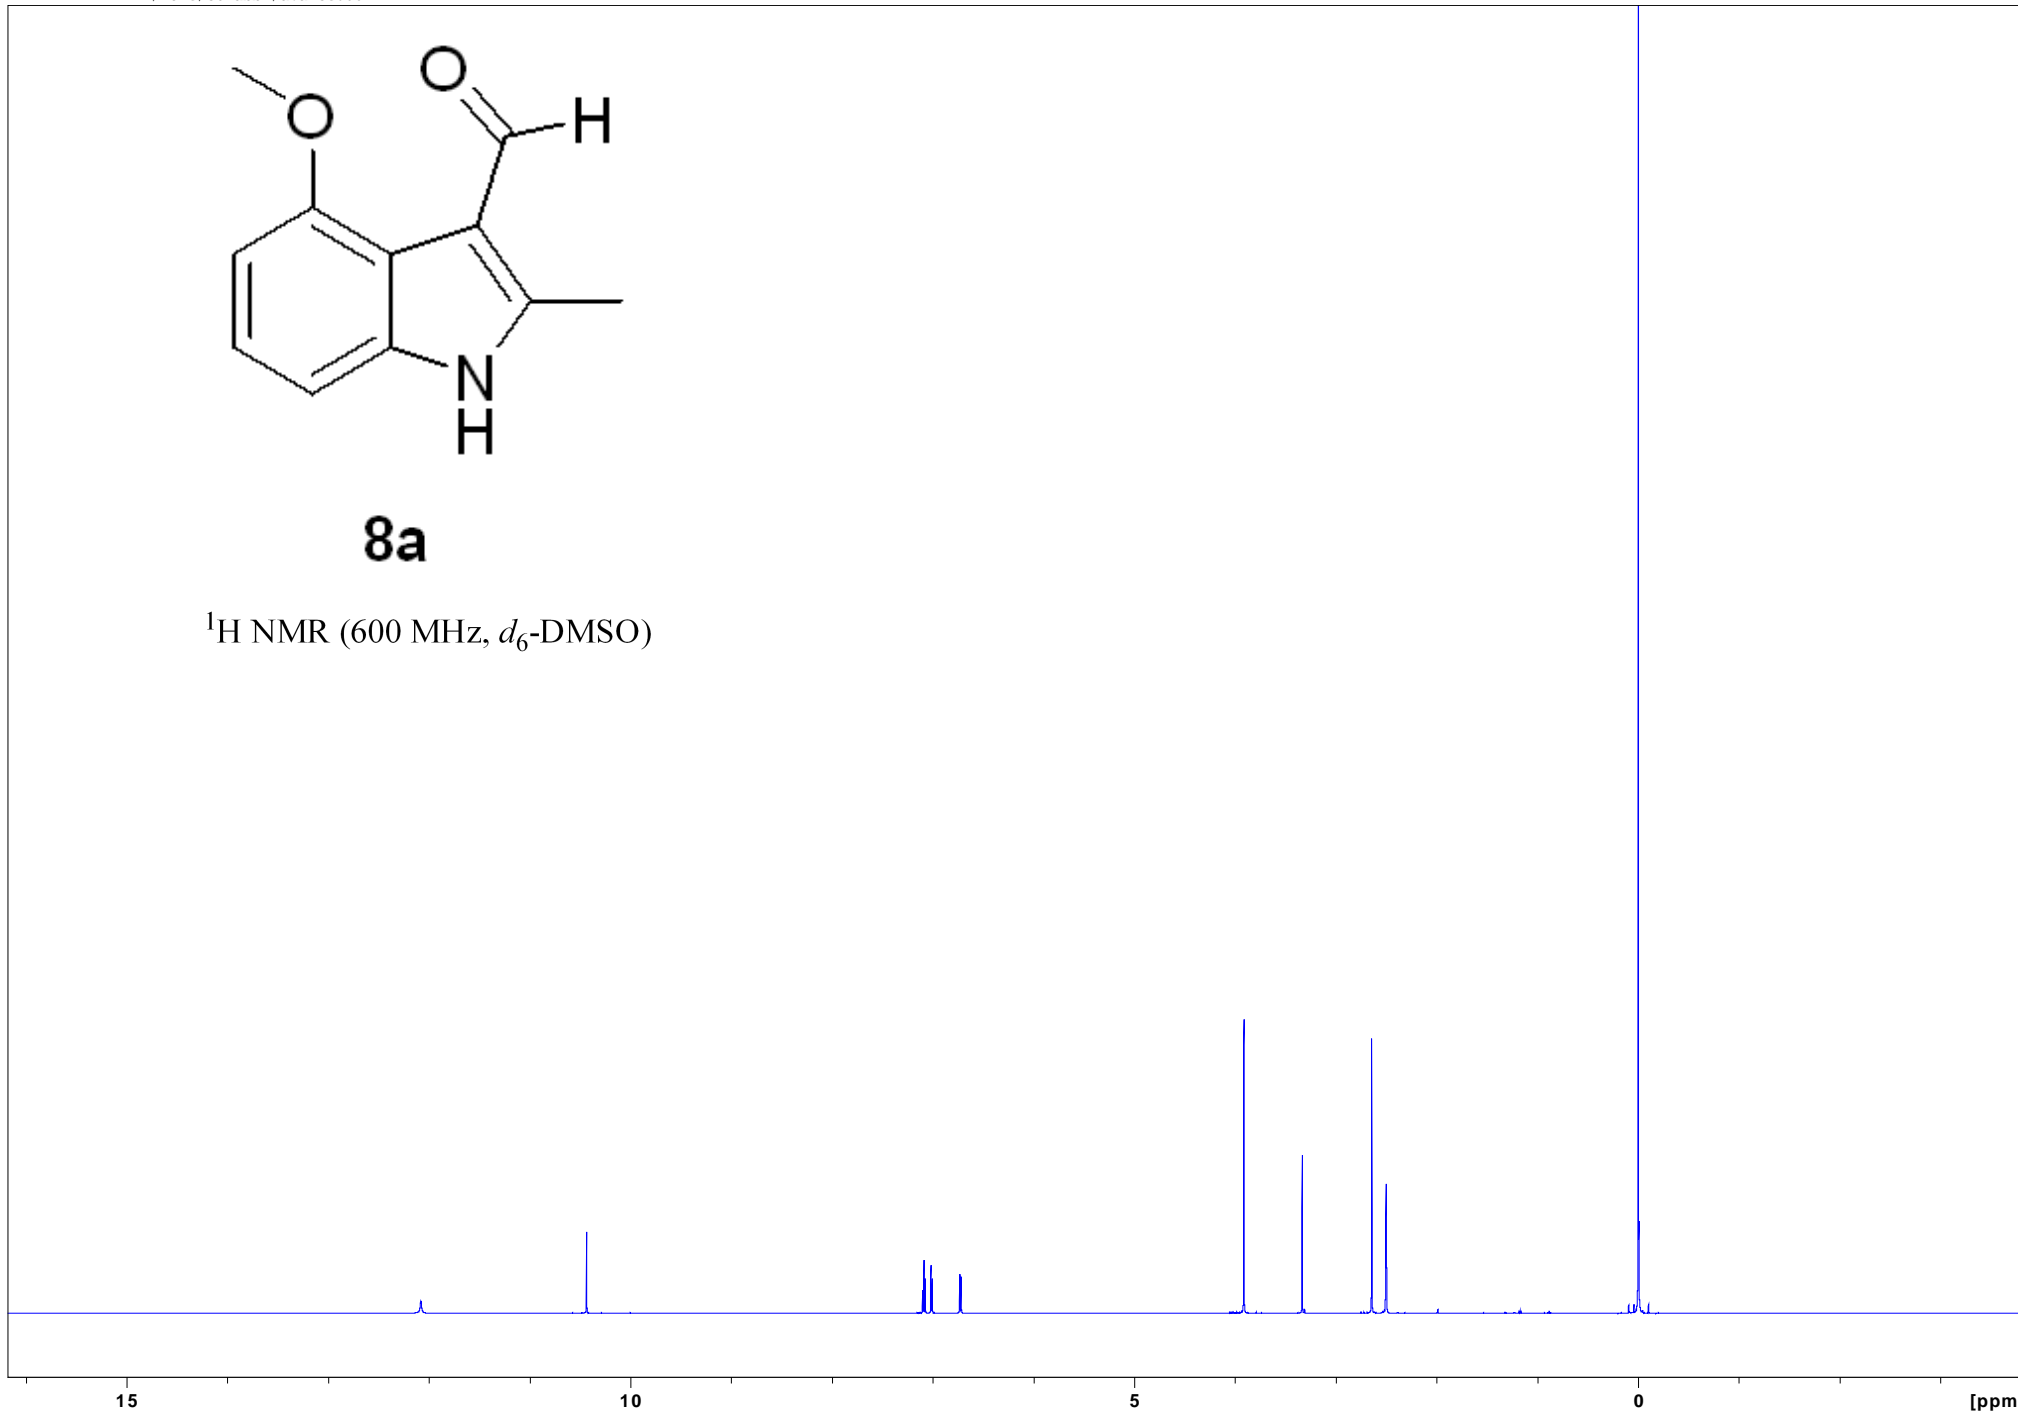

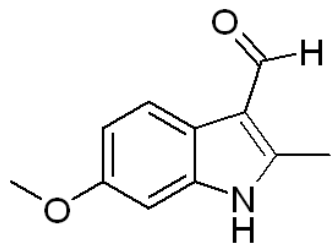

**8b**

$^1\text{H}$  NMR (600 MHz,  $d_6$ -DMSO)

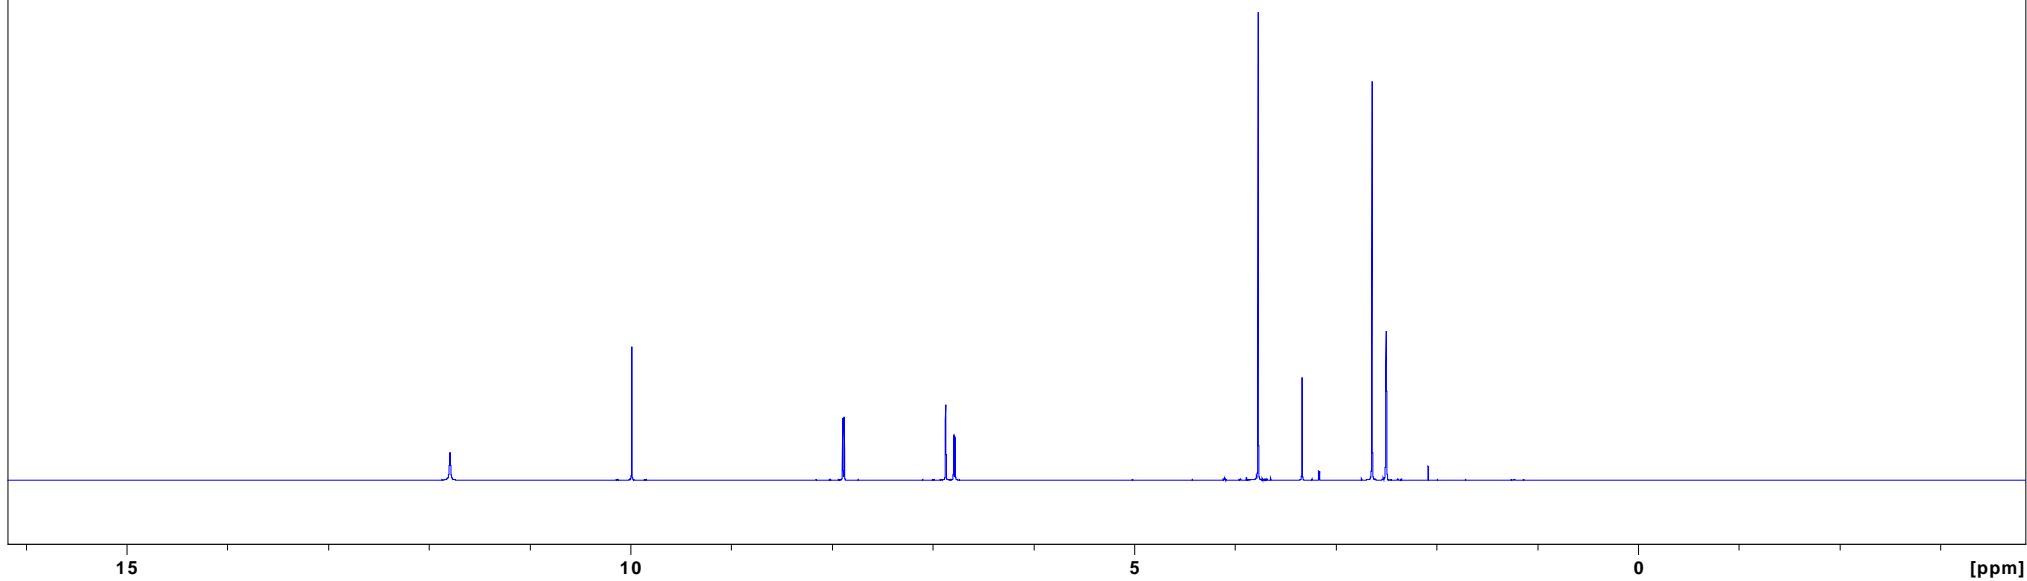

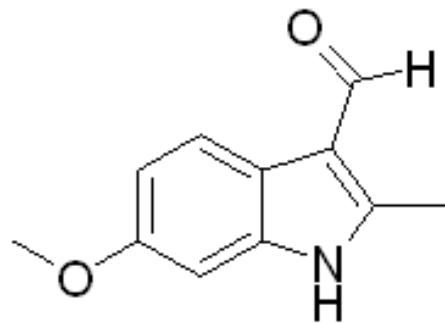

**8b**

**Scheme 2**

$^1\text{H}$  NMR (600 MHz,  $d_6$ -DMSO)

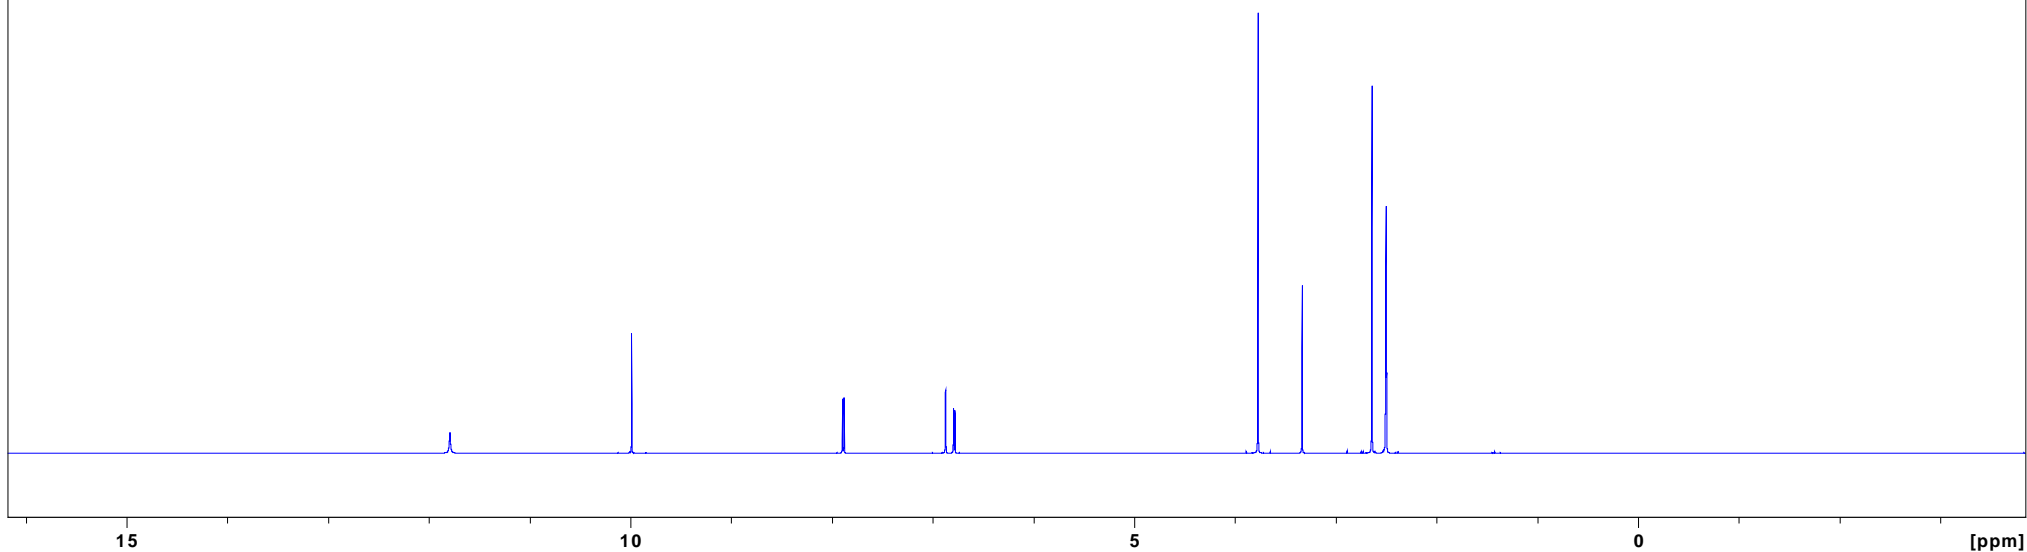



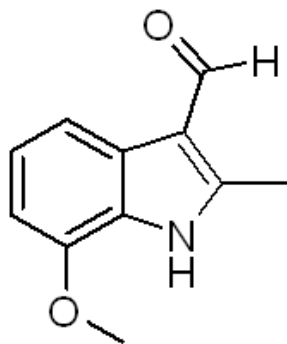

**8c**

<sup>1</sup>H NMR (600 MHz, *d*<sub>6</sub>-DMSO)

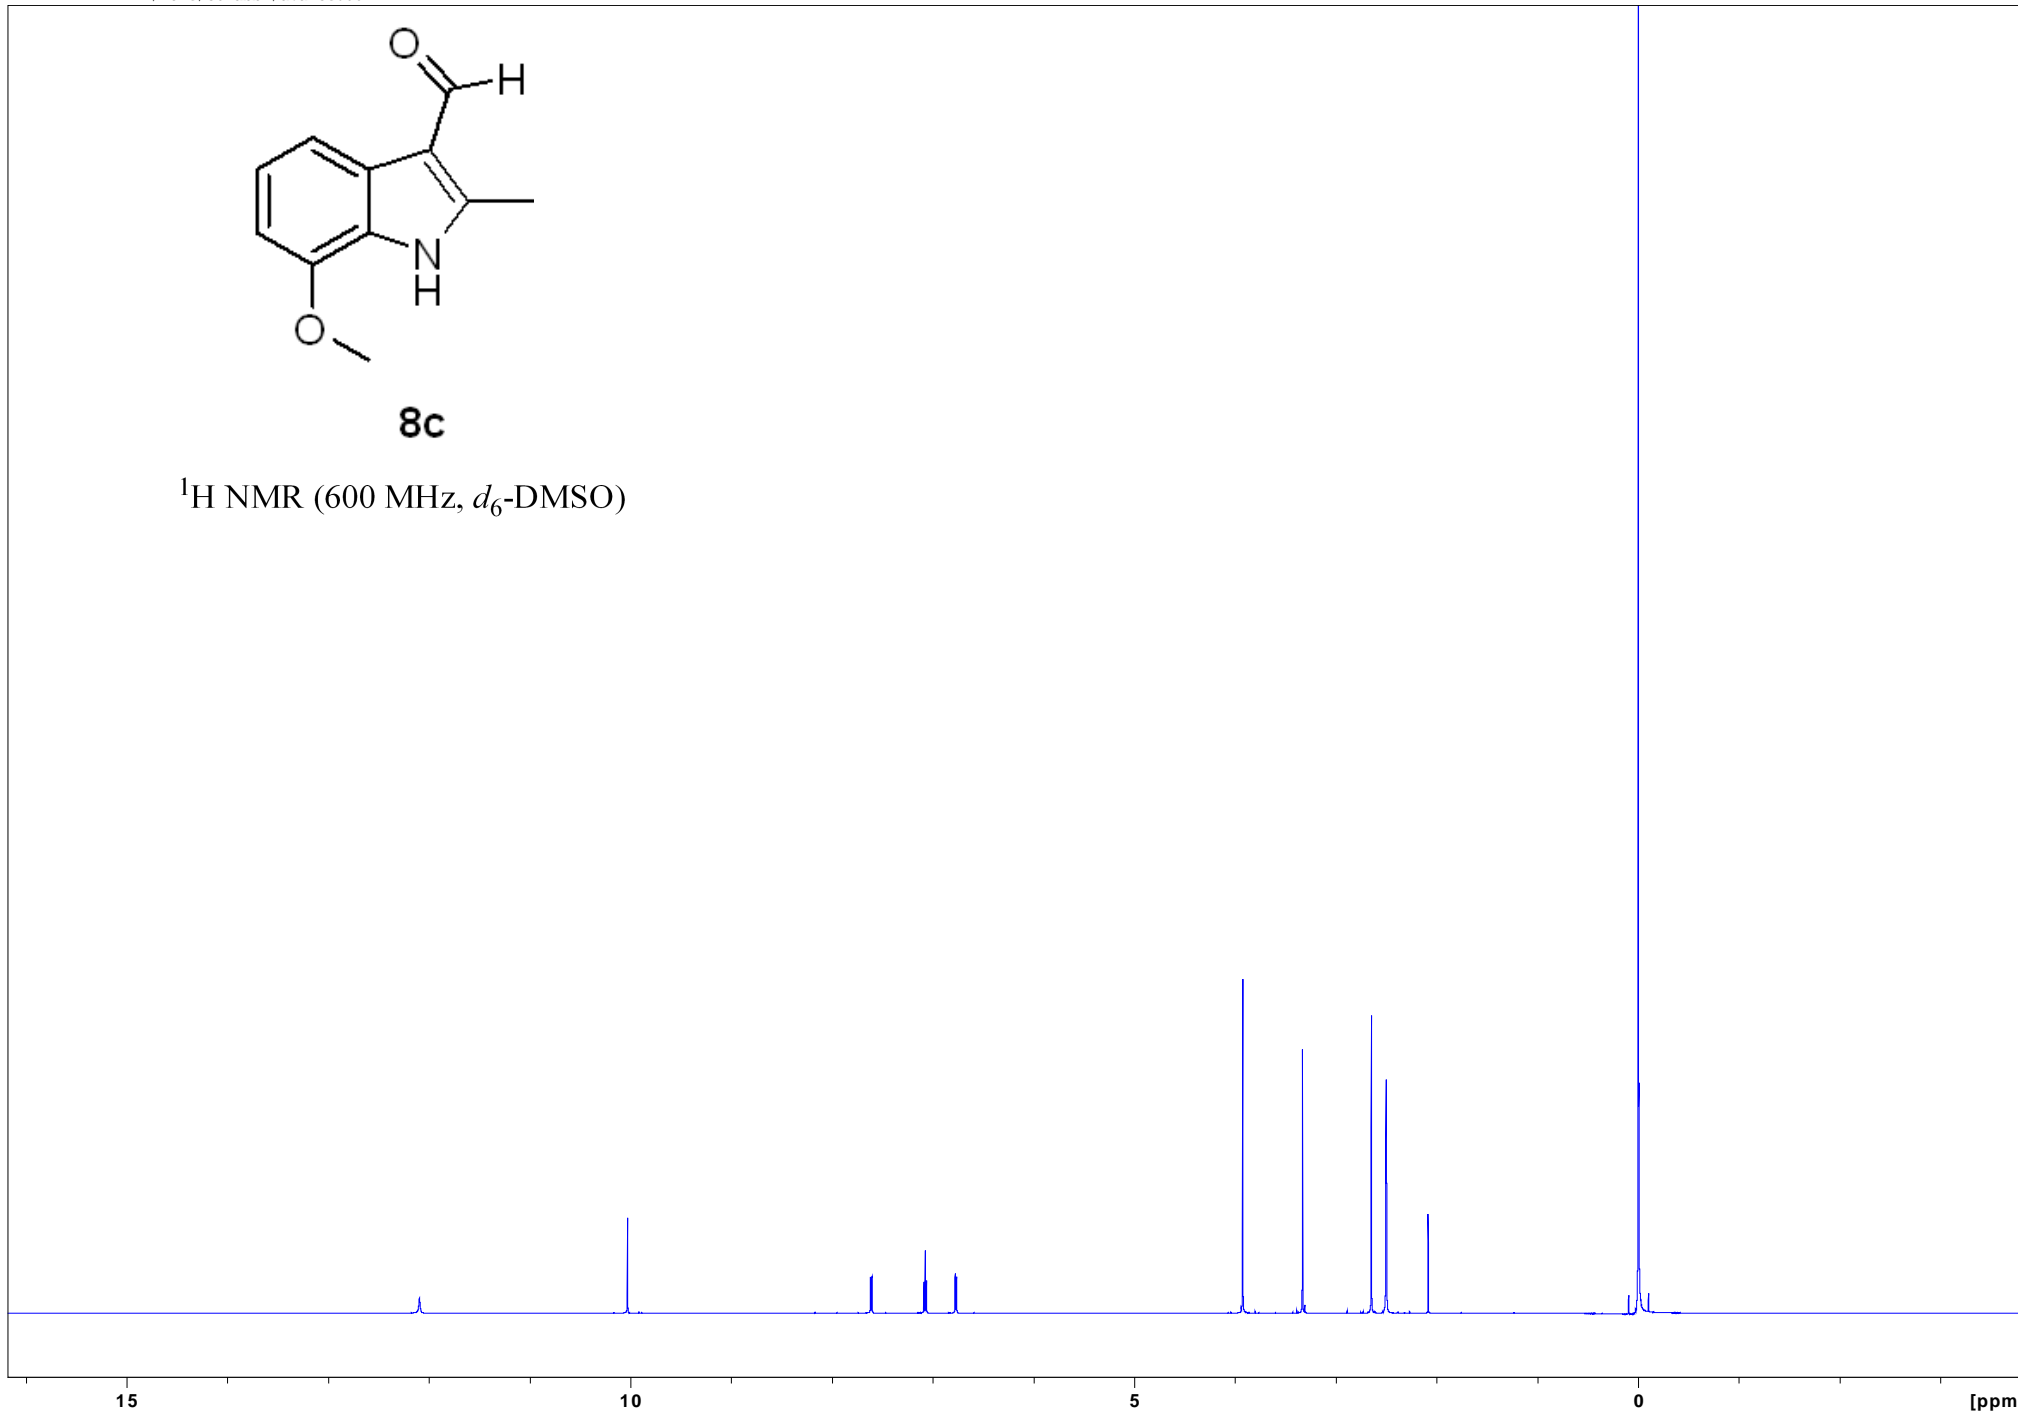

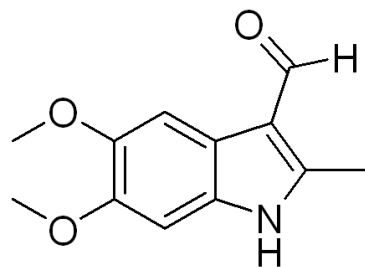

**8d**

$^1\text{H}$  NMR (600 MHz,  $d_6$ -acetone)

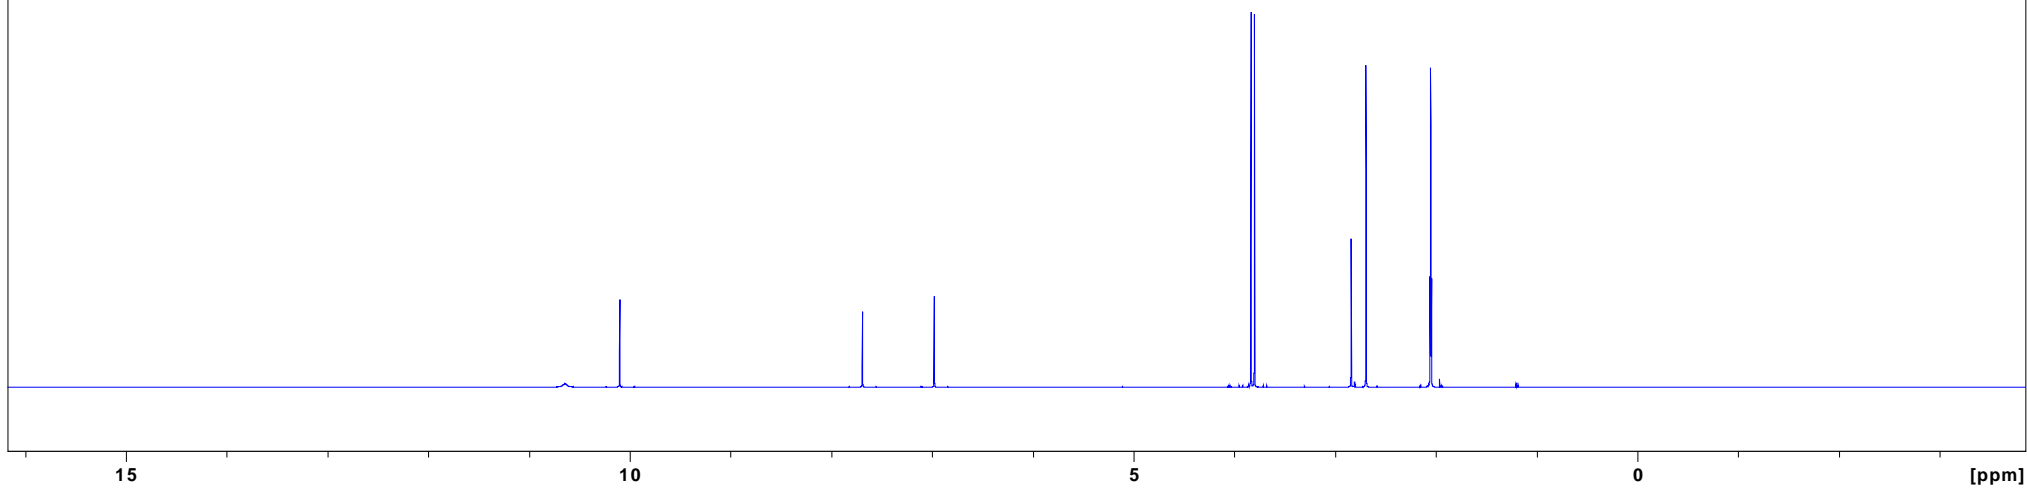

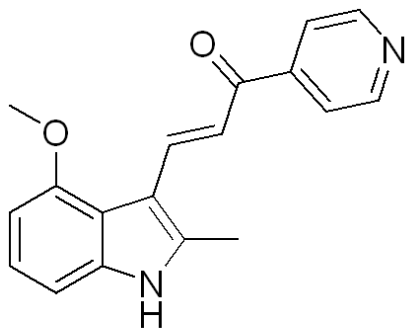

**9a**

$^1\text{H}$  NMR (600 MHz,  $d_6$ -DMSO)

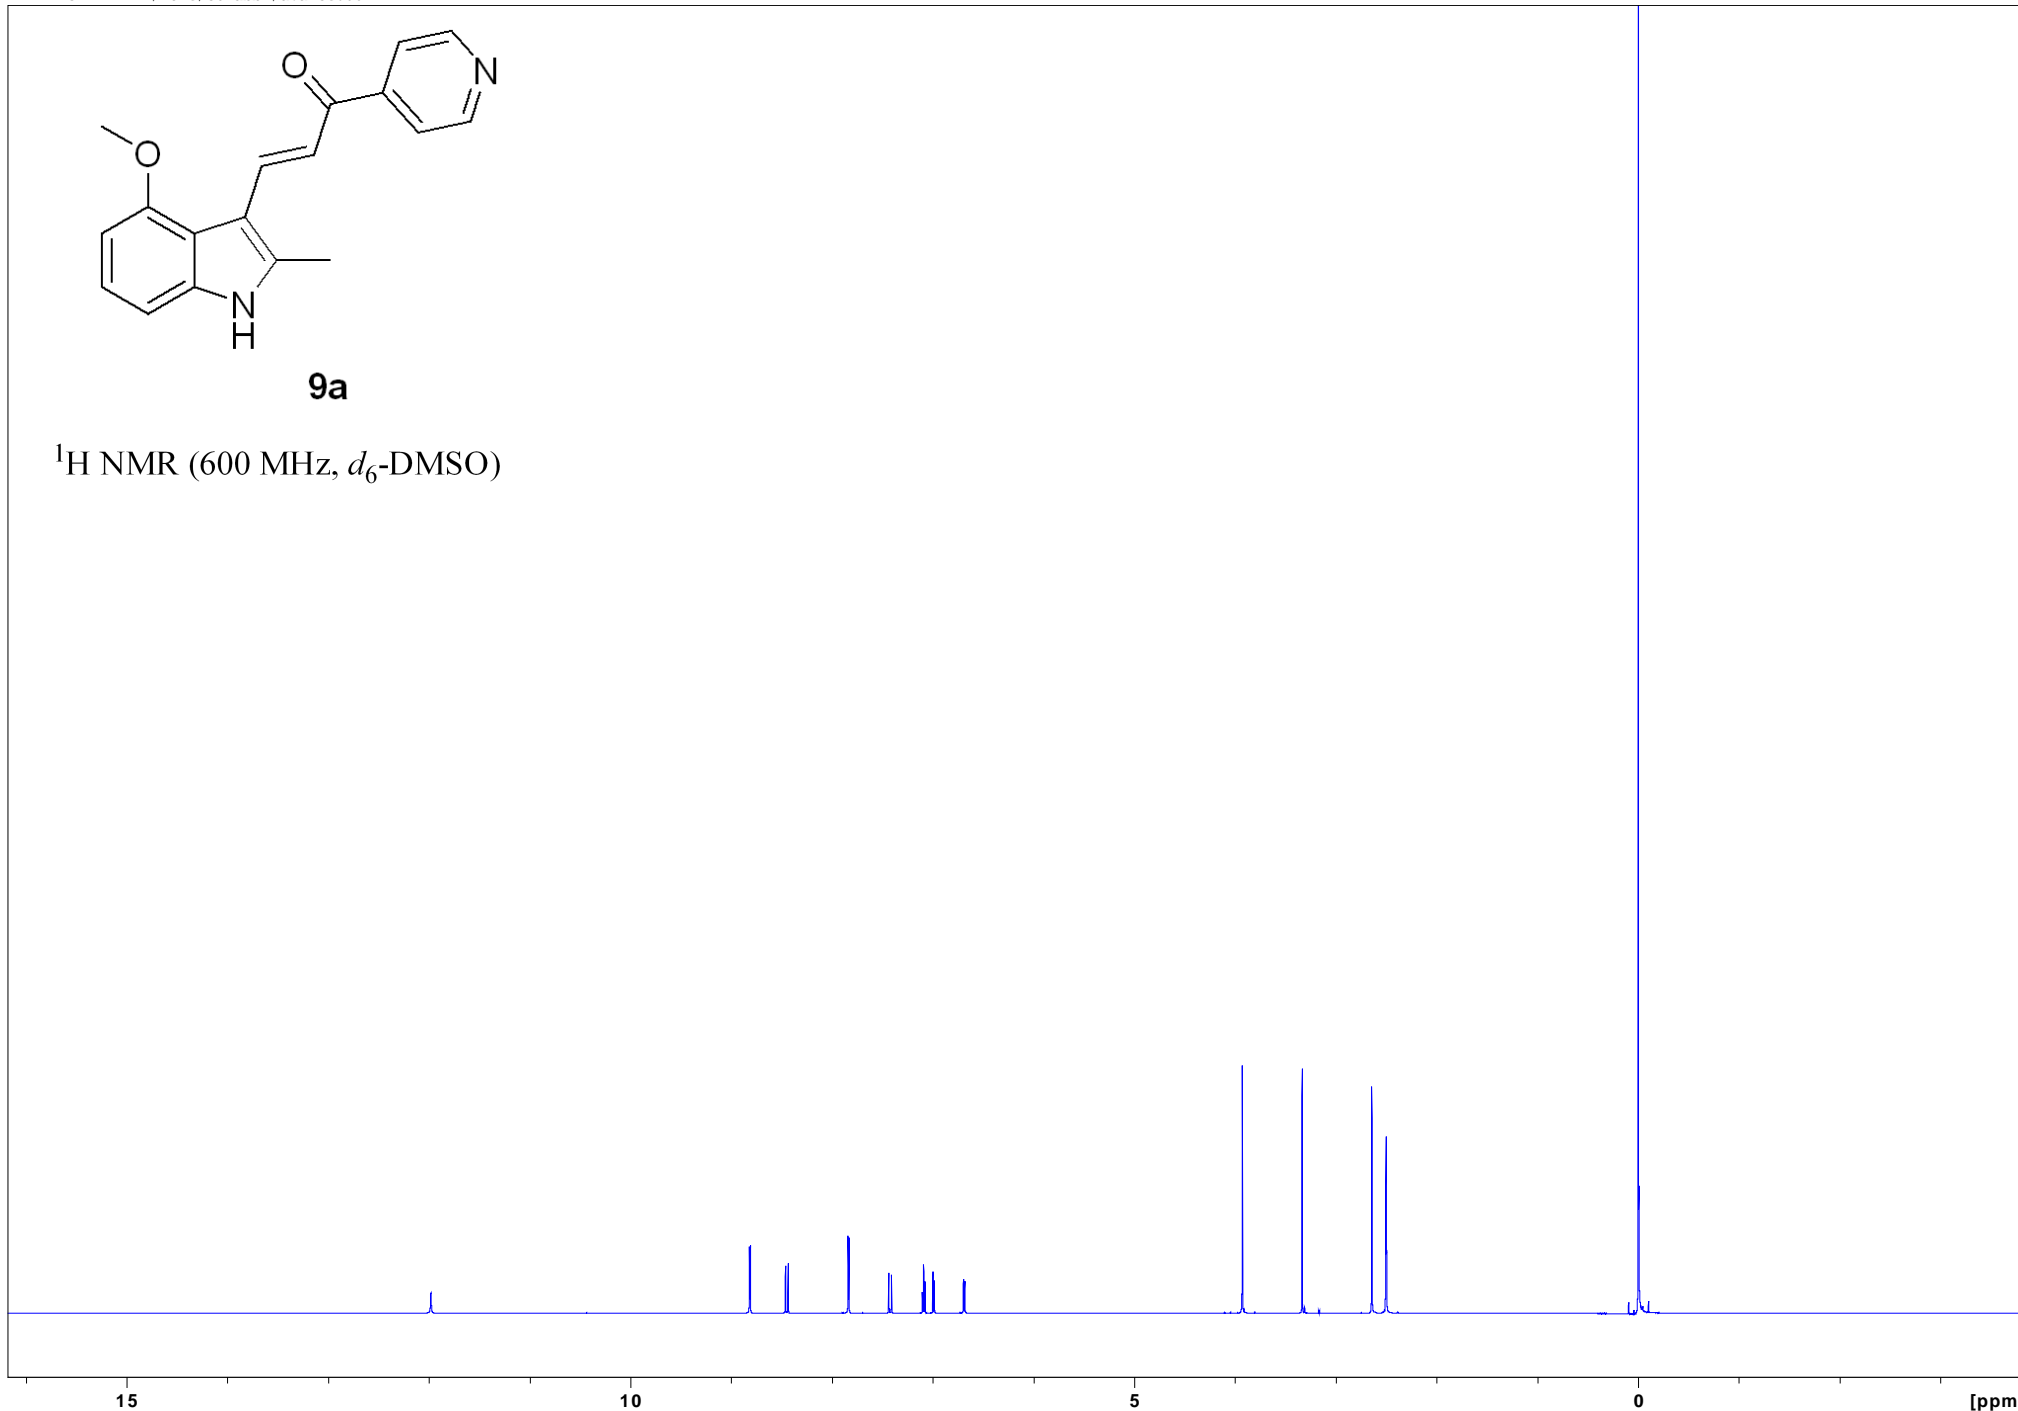

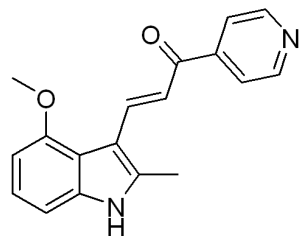

**9a**

$^{13}\text{C}$  NMR (150 MHz,  $d_6$ -DMSO)

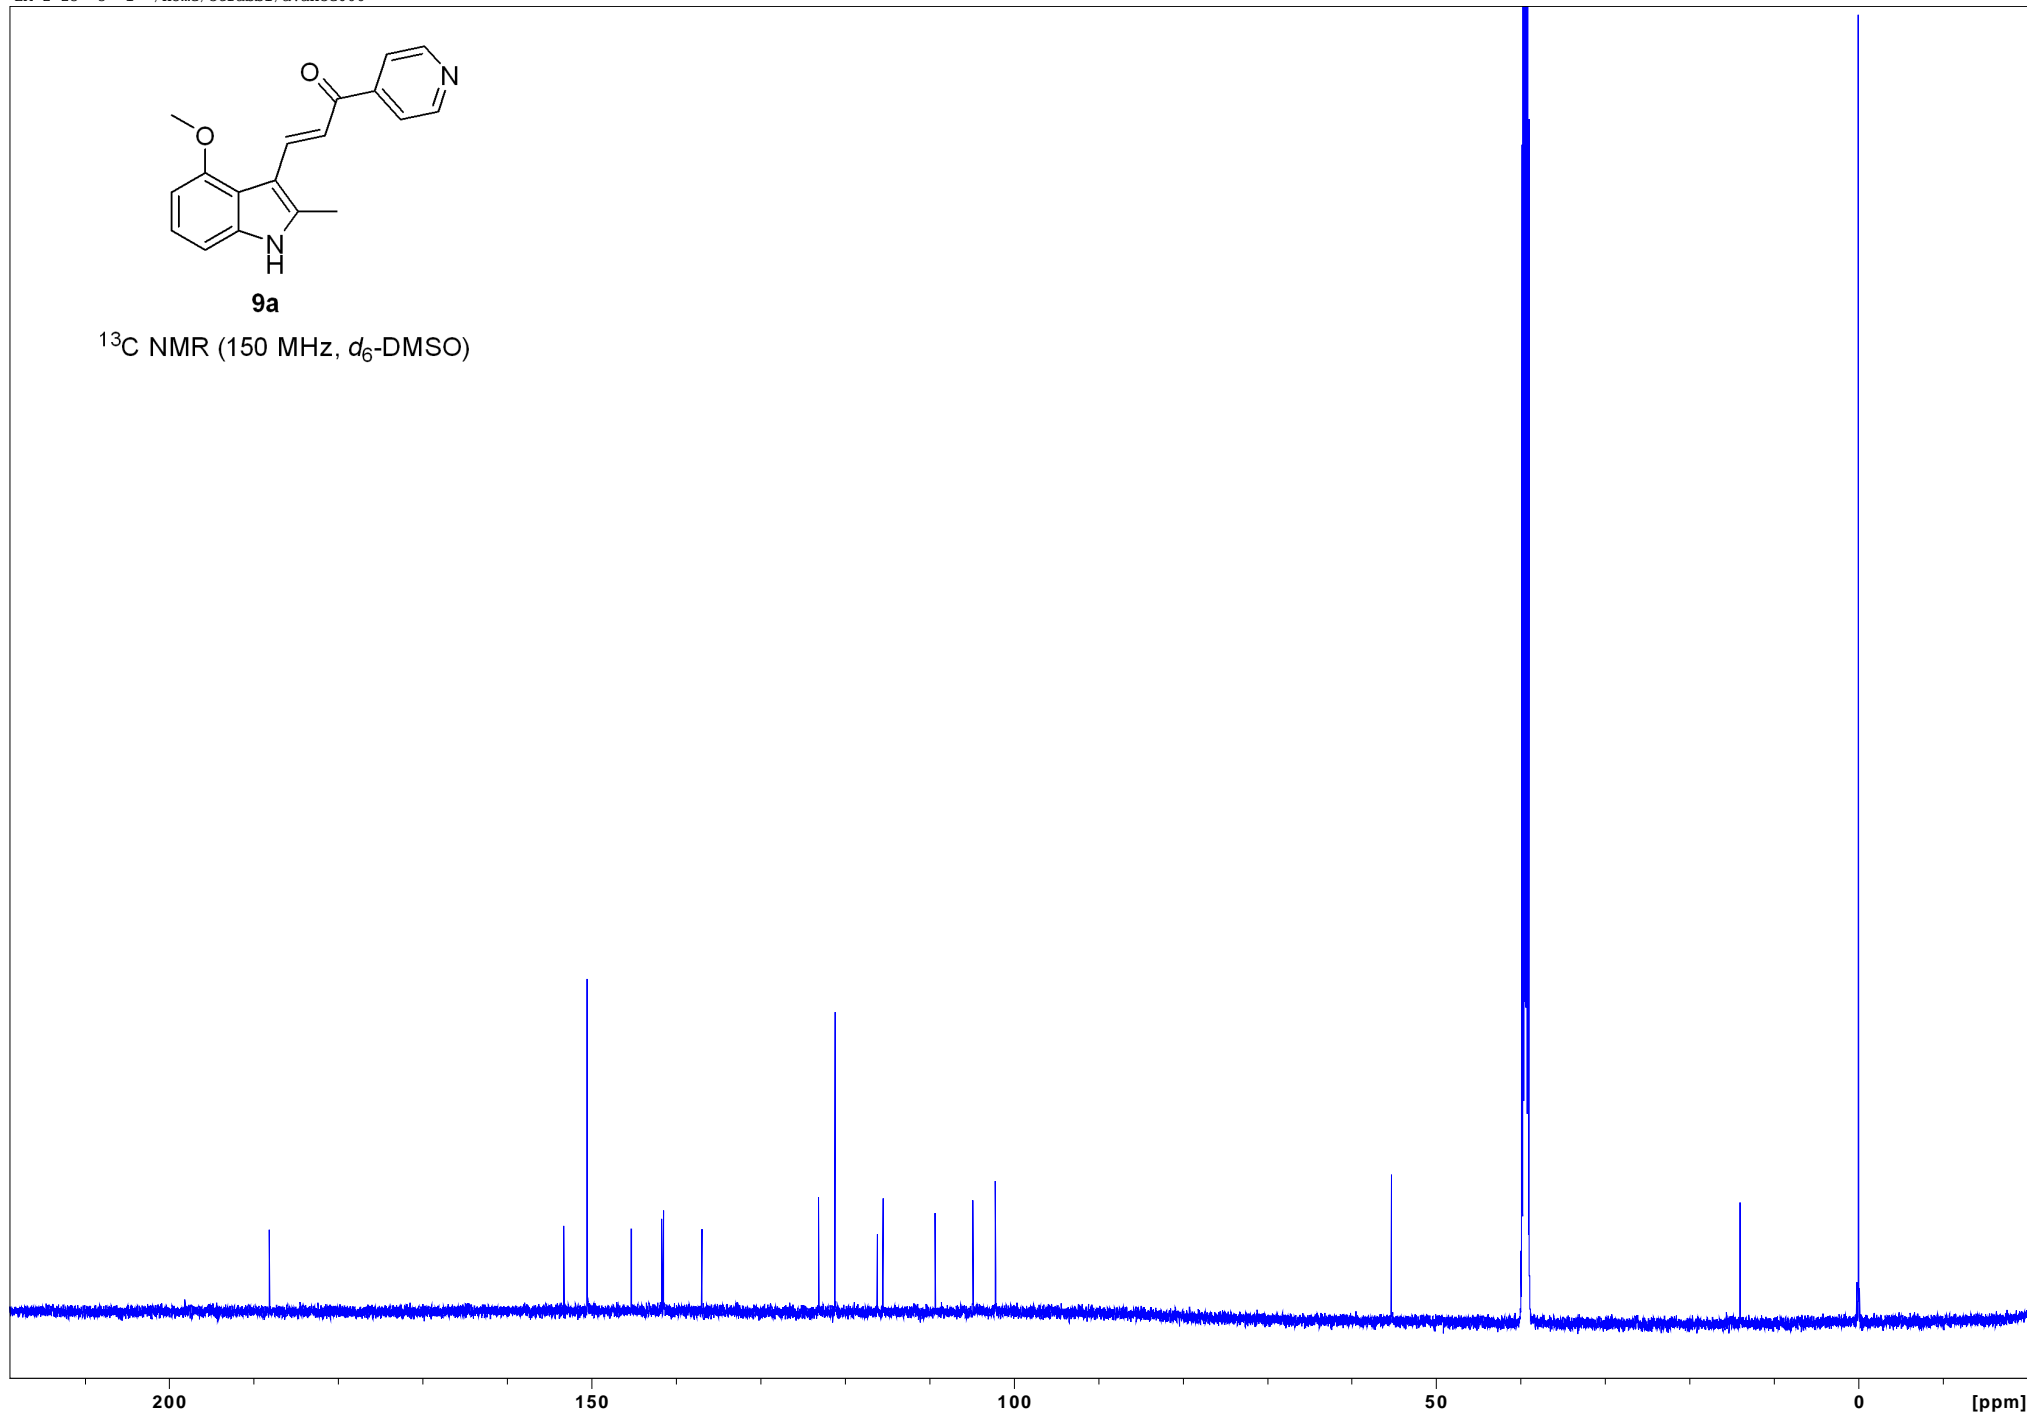

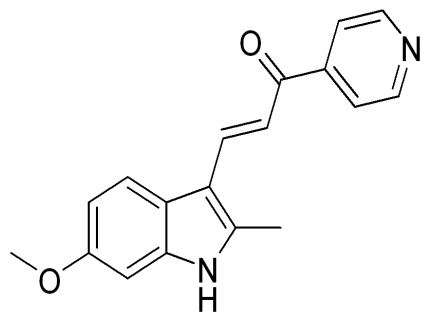

**9b**

$^1\text{H}$  NMR (600 MHz,  $d_6$ -DMSO)

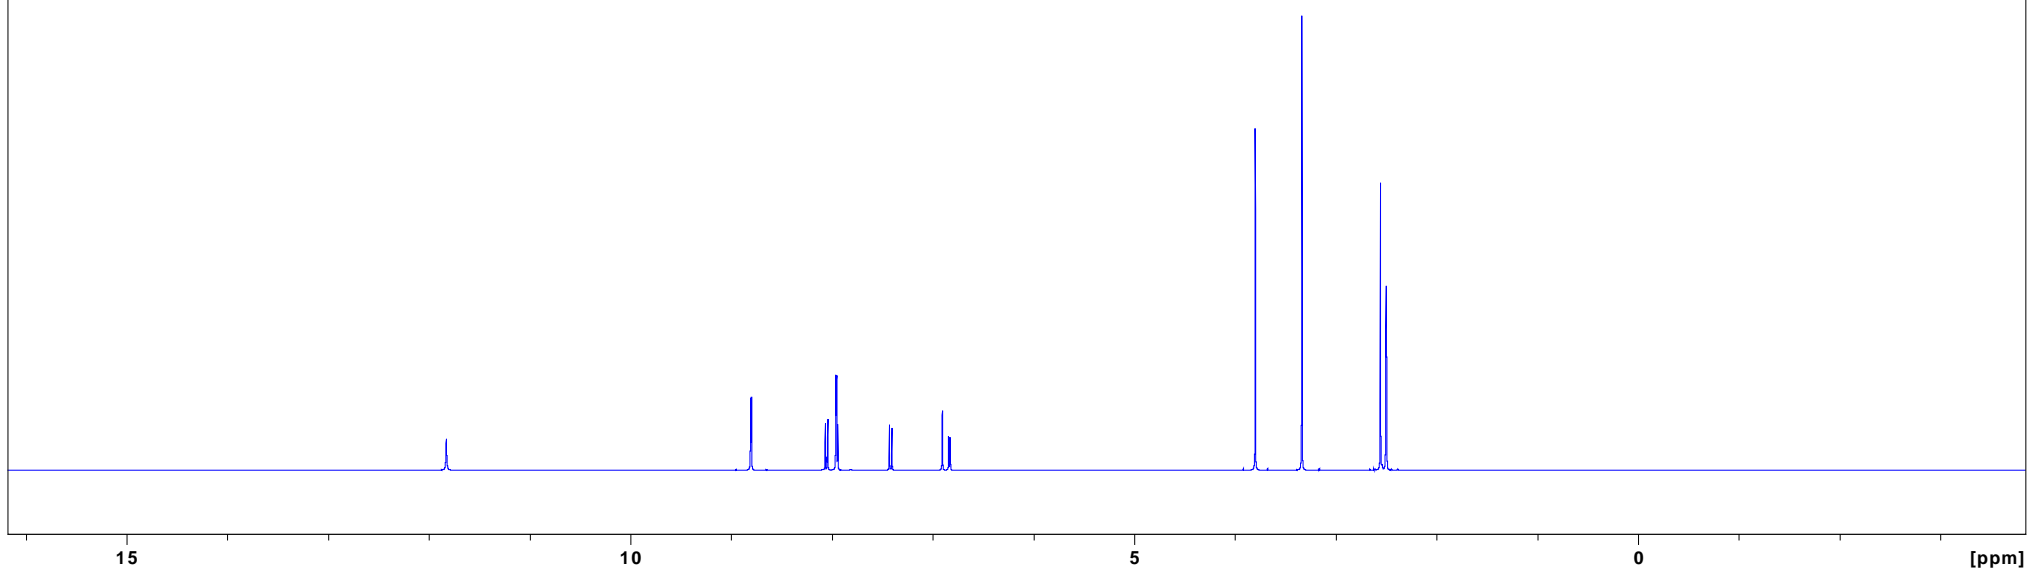

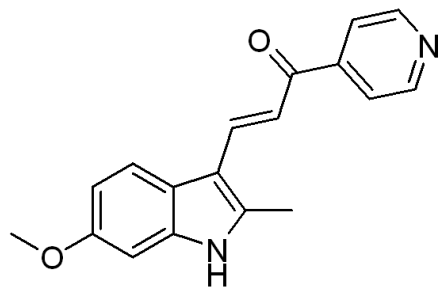

**9b**

$^{13}\text{C}$  NMR (150 MHz,  $d_6$ -DMSO)

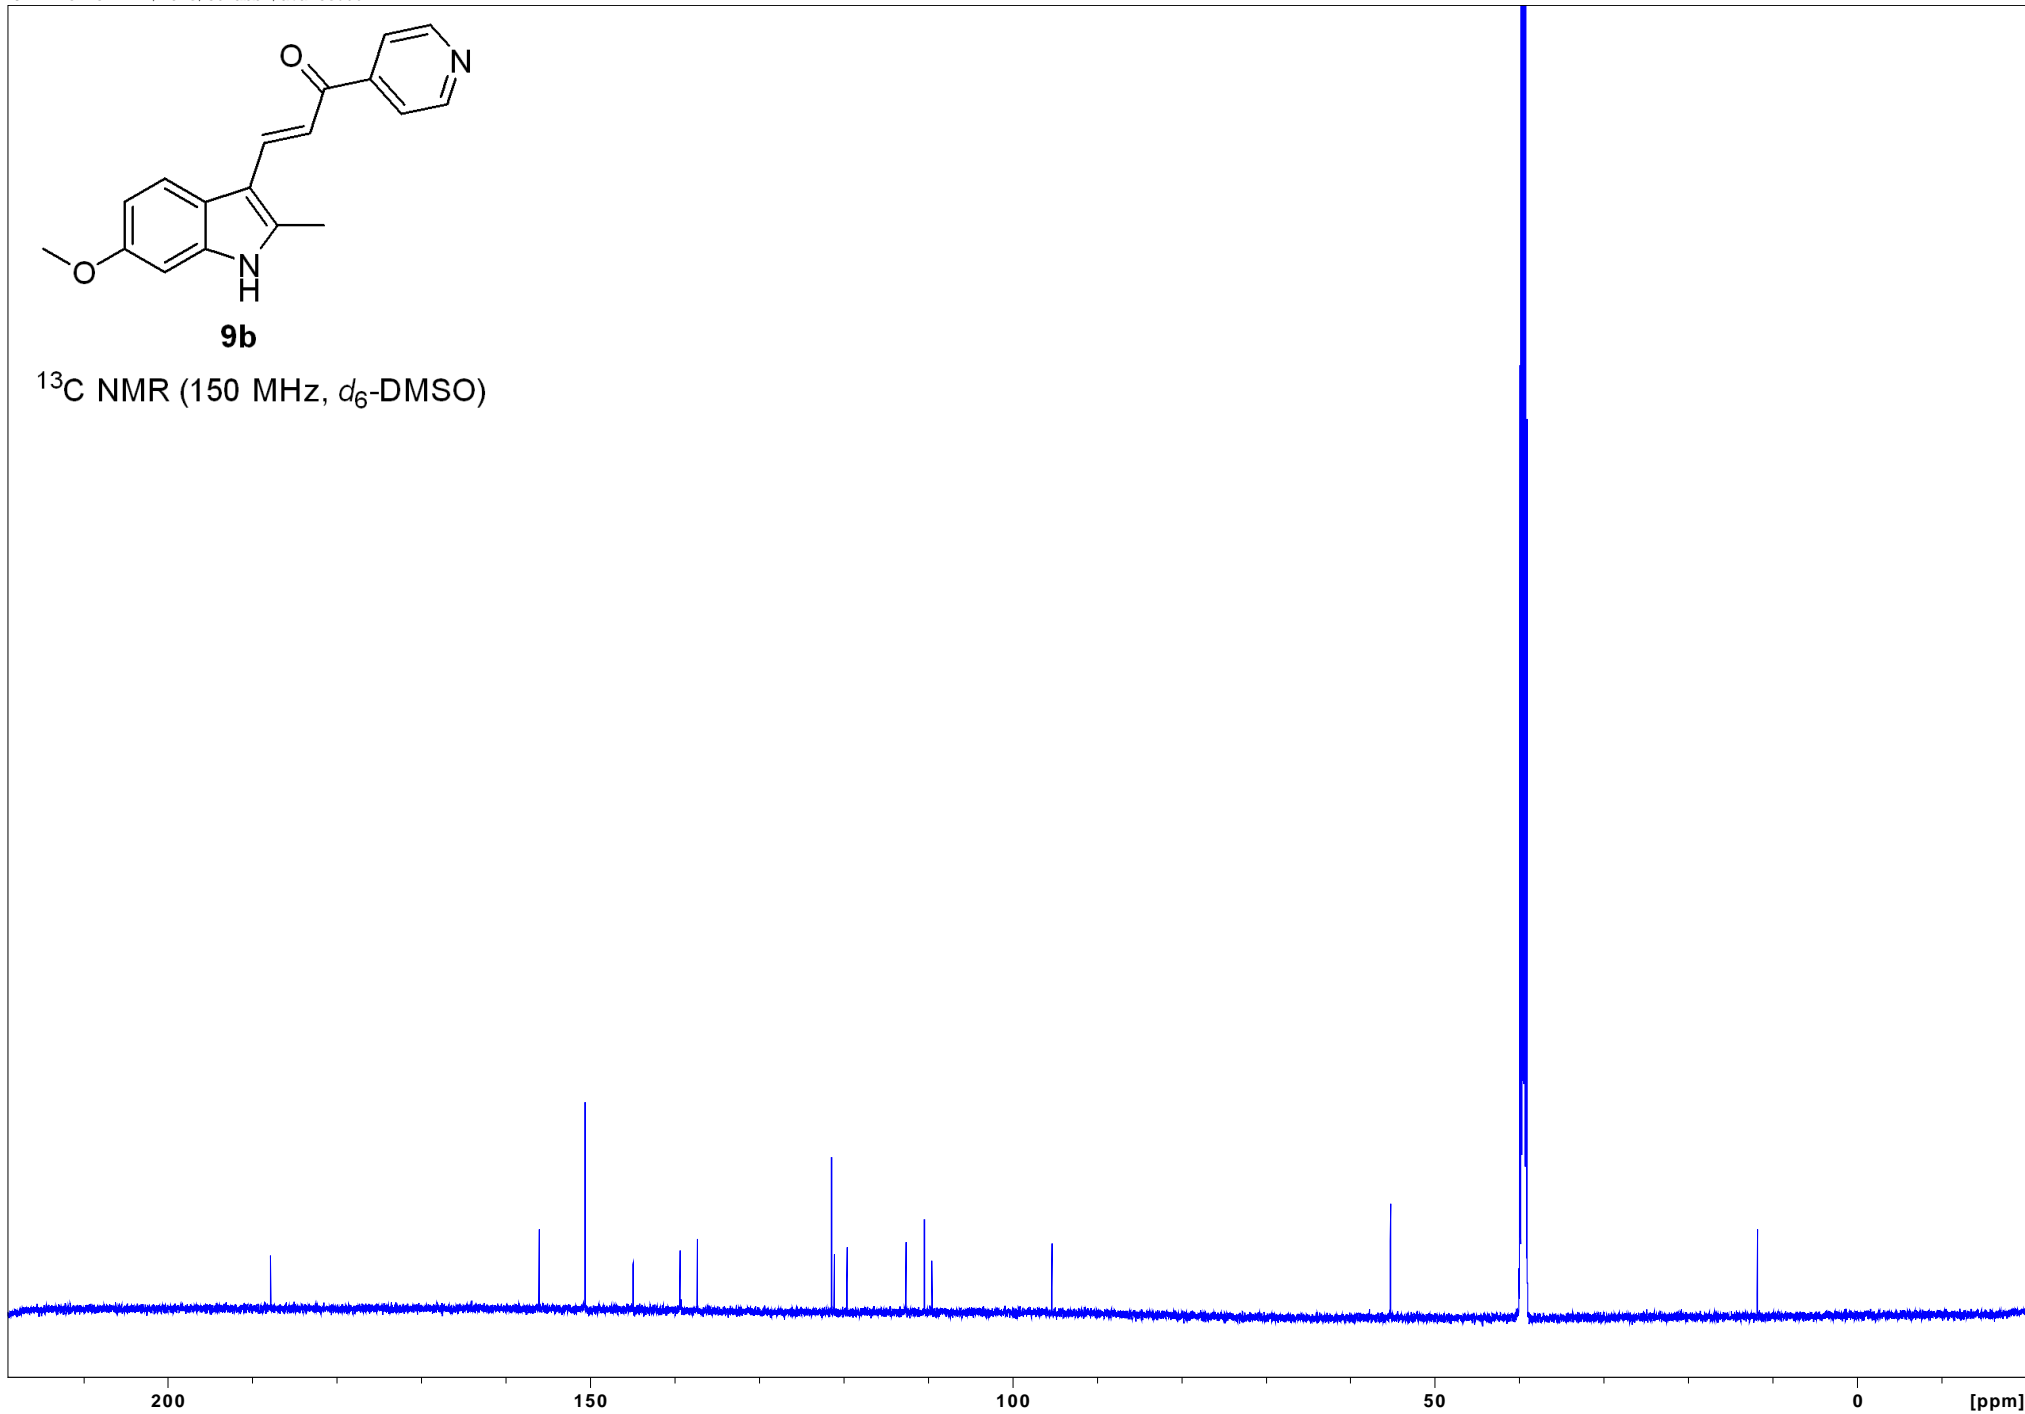

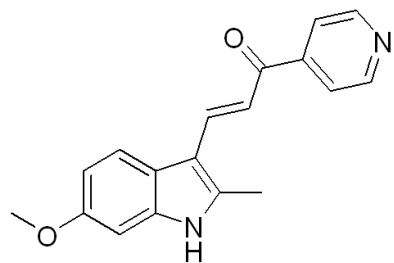

**9b**

Scheme 2

$^1\text{H}$  NMR (600 MHz,  $d_6$ -DMSO)

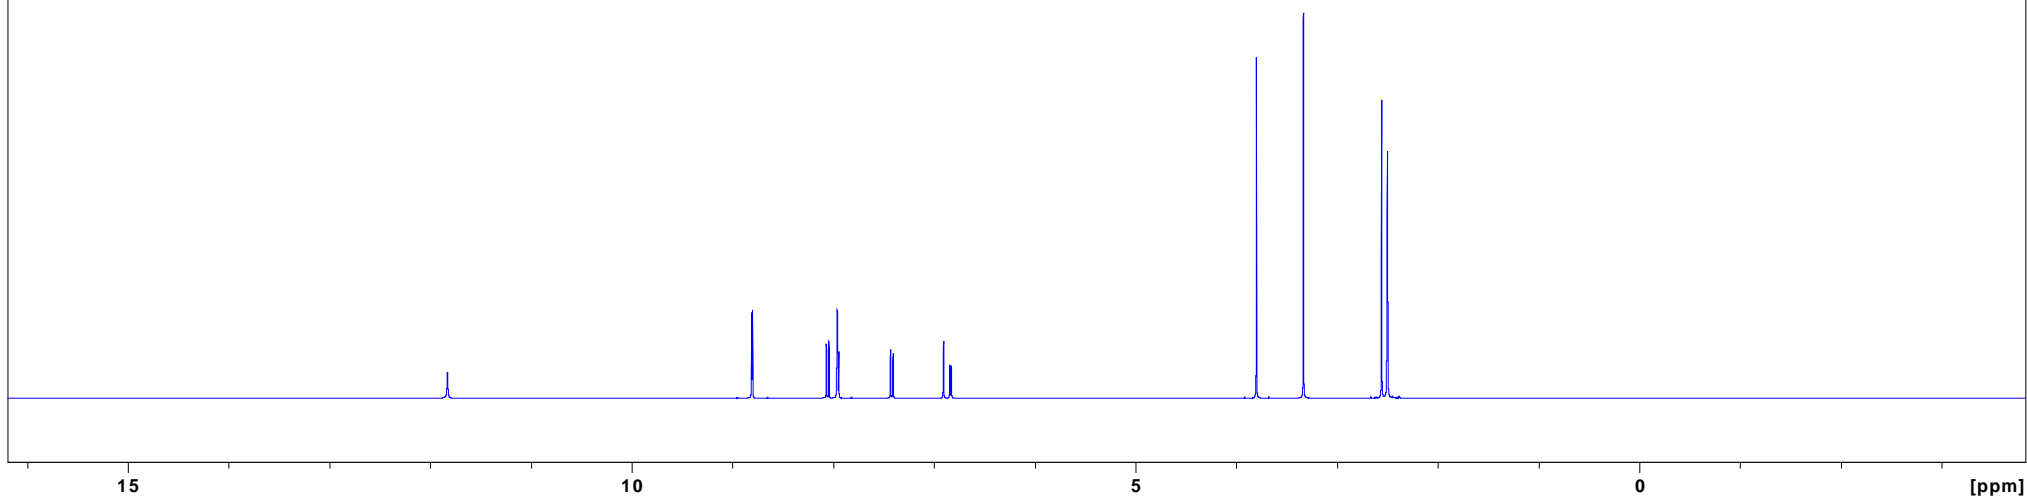

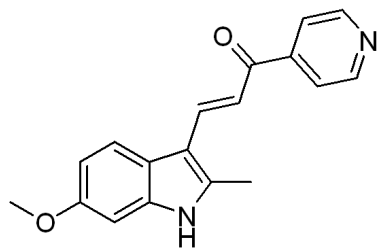

**9b-Scheme 2**

$^{13}\text{C}$  NMR (150 MHz,  $d_6$ -DMSO)

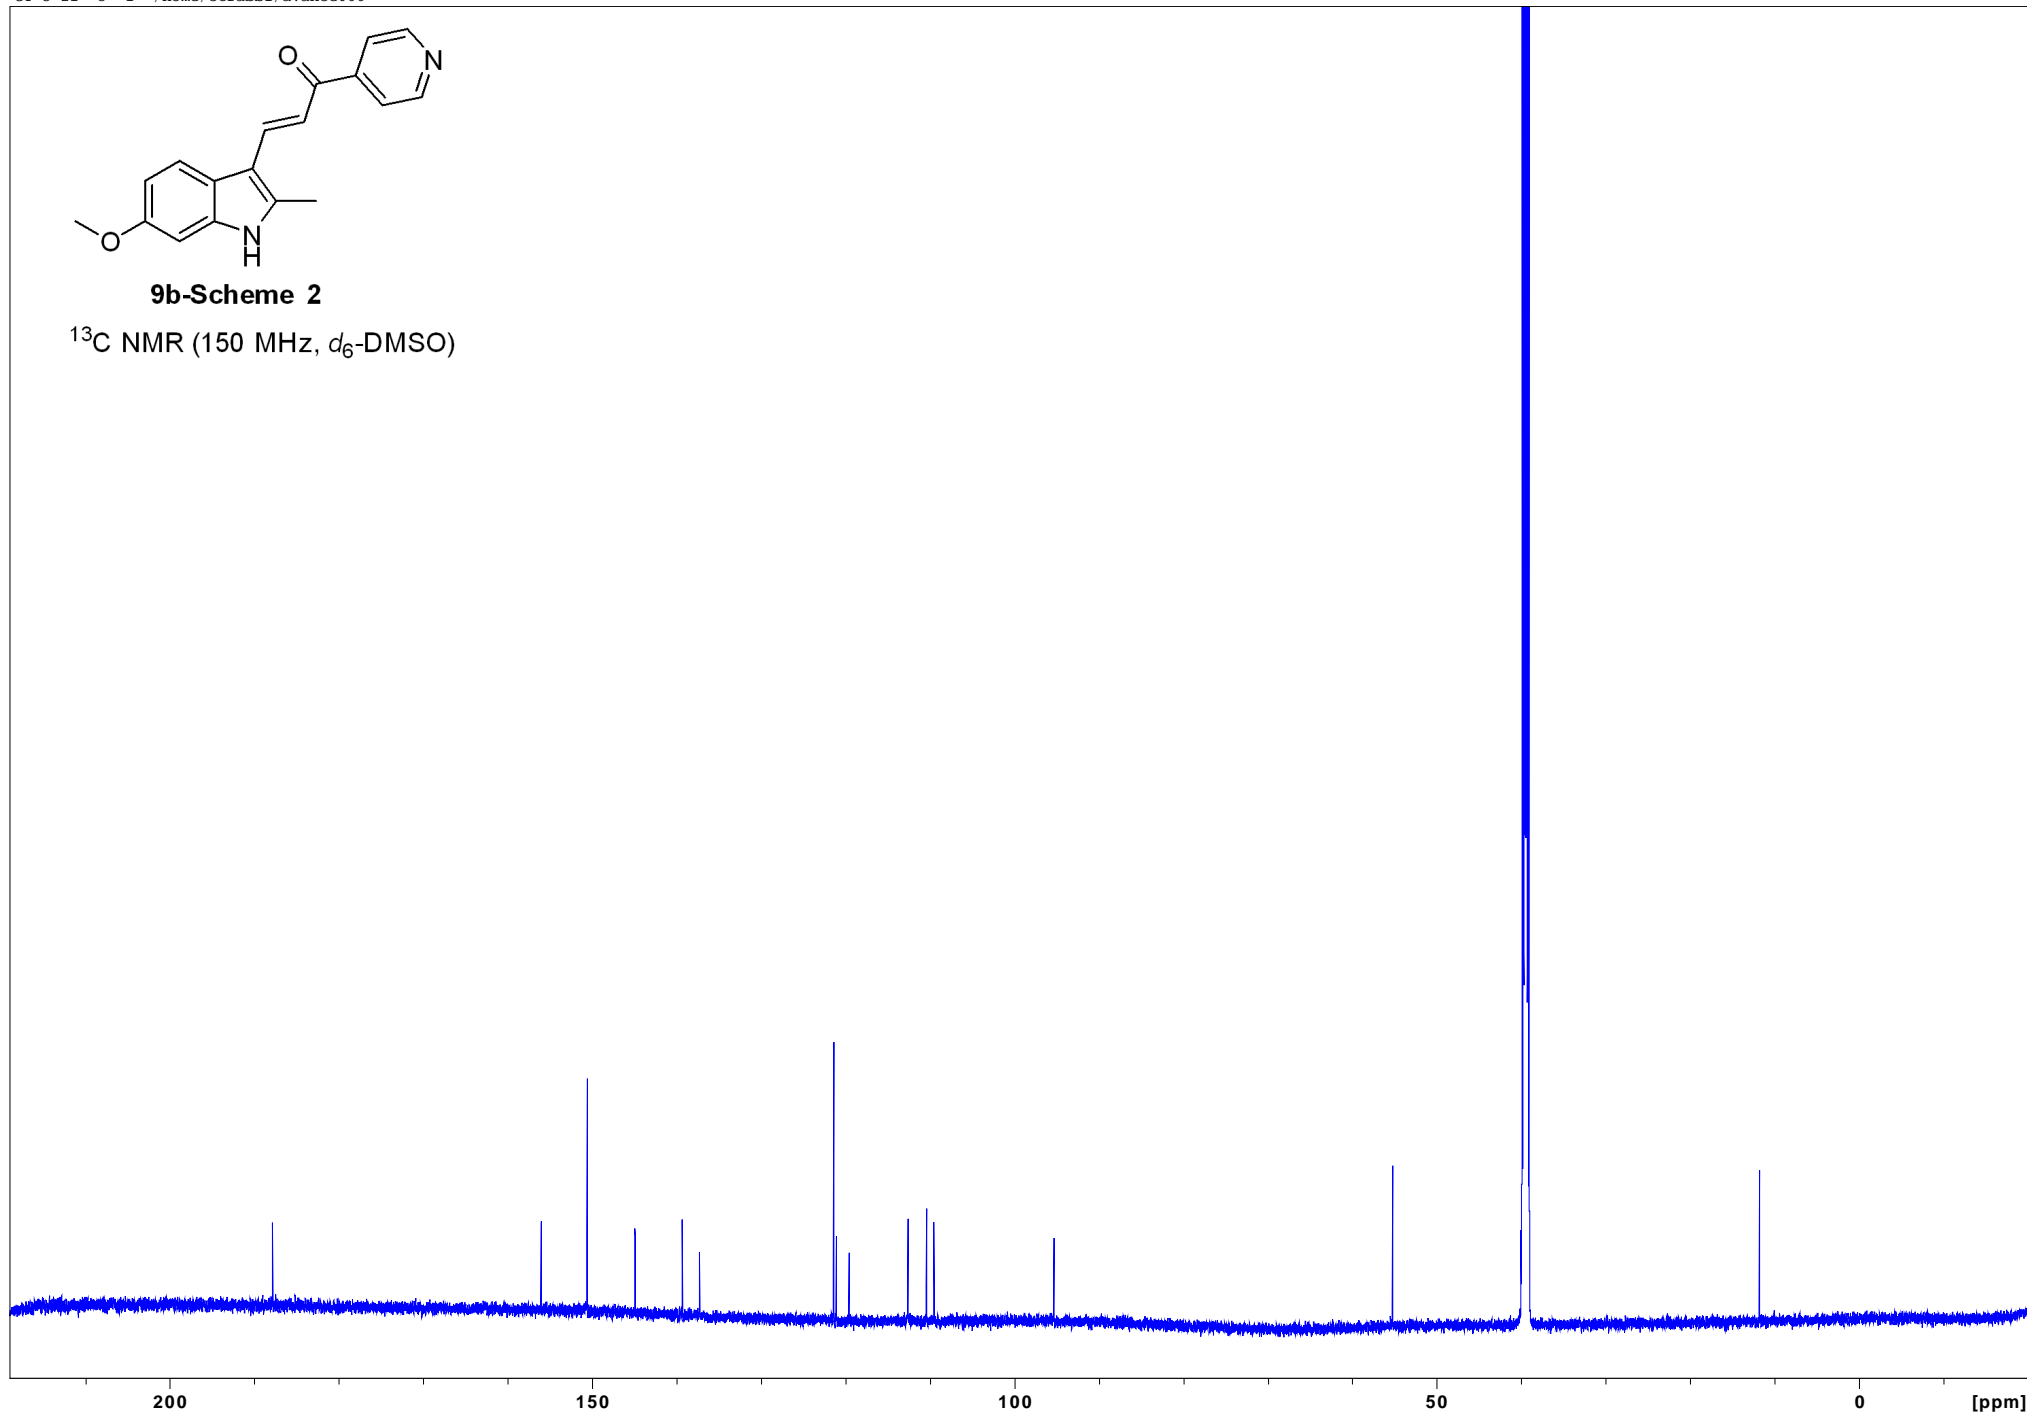



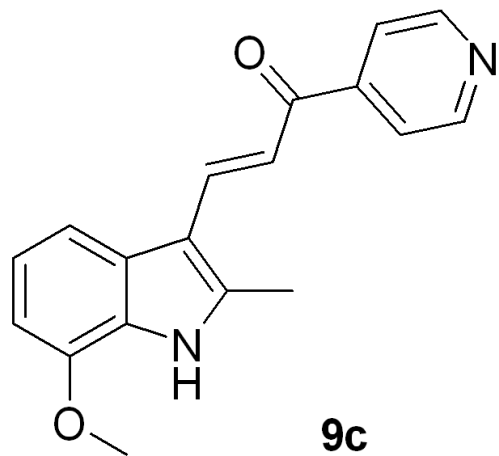

$^1\text{H}$  NMR (600 MHz,  $d_6$ -DMSO)

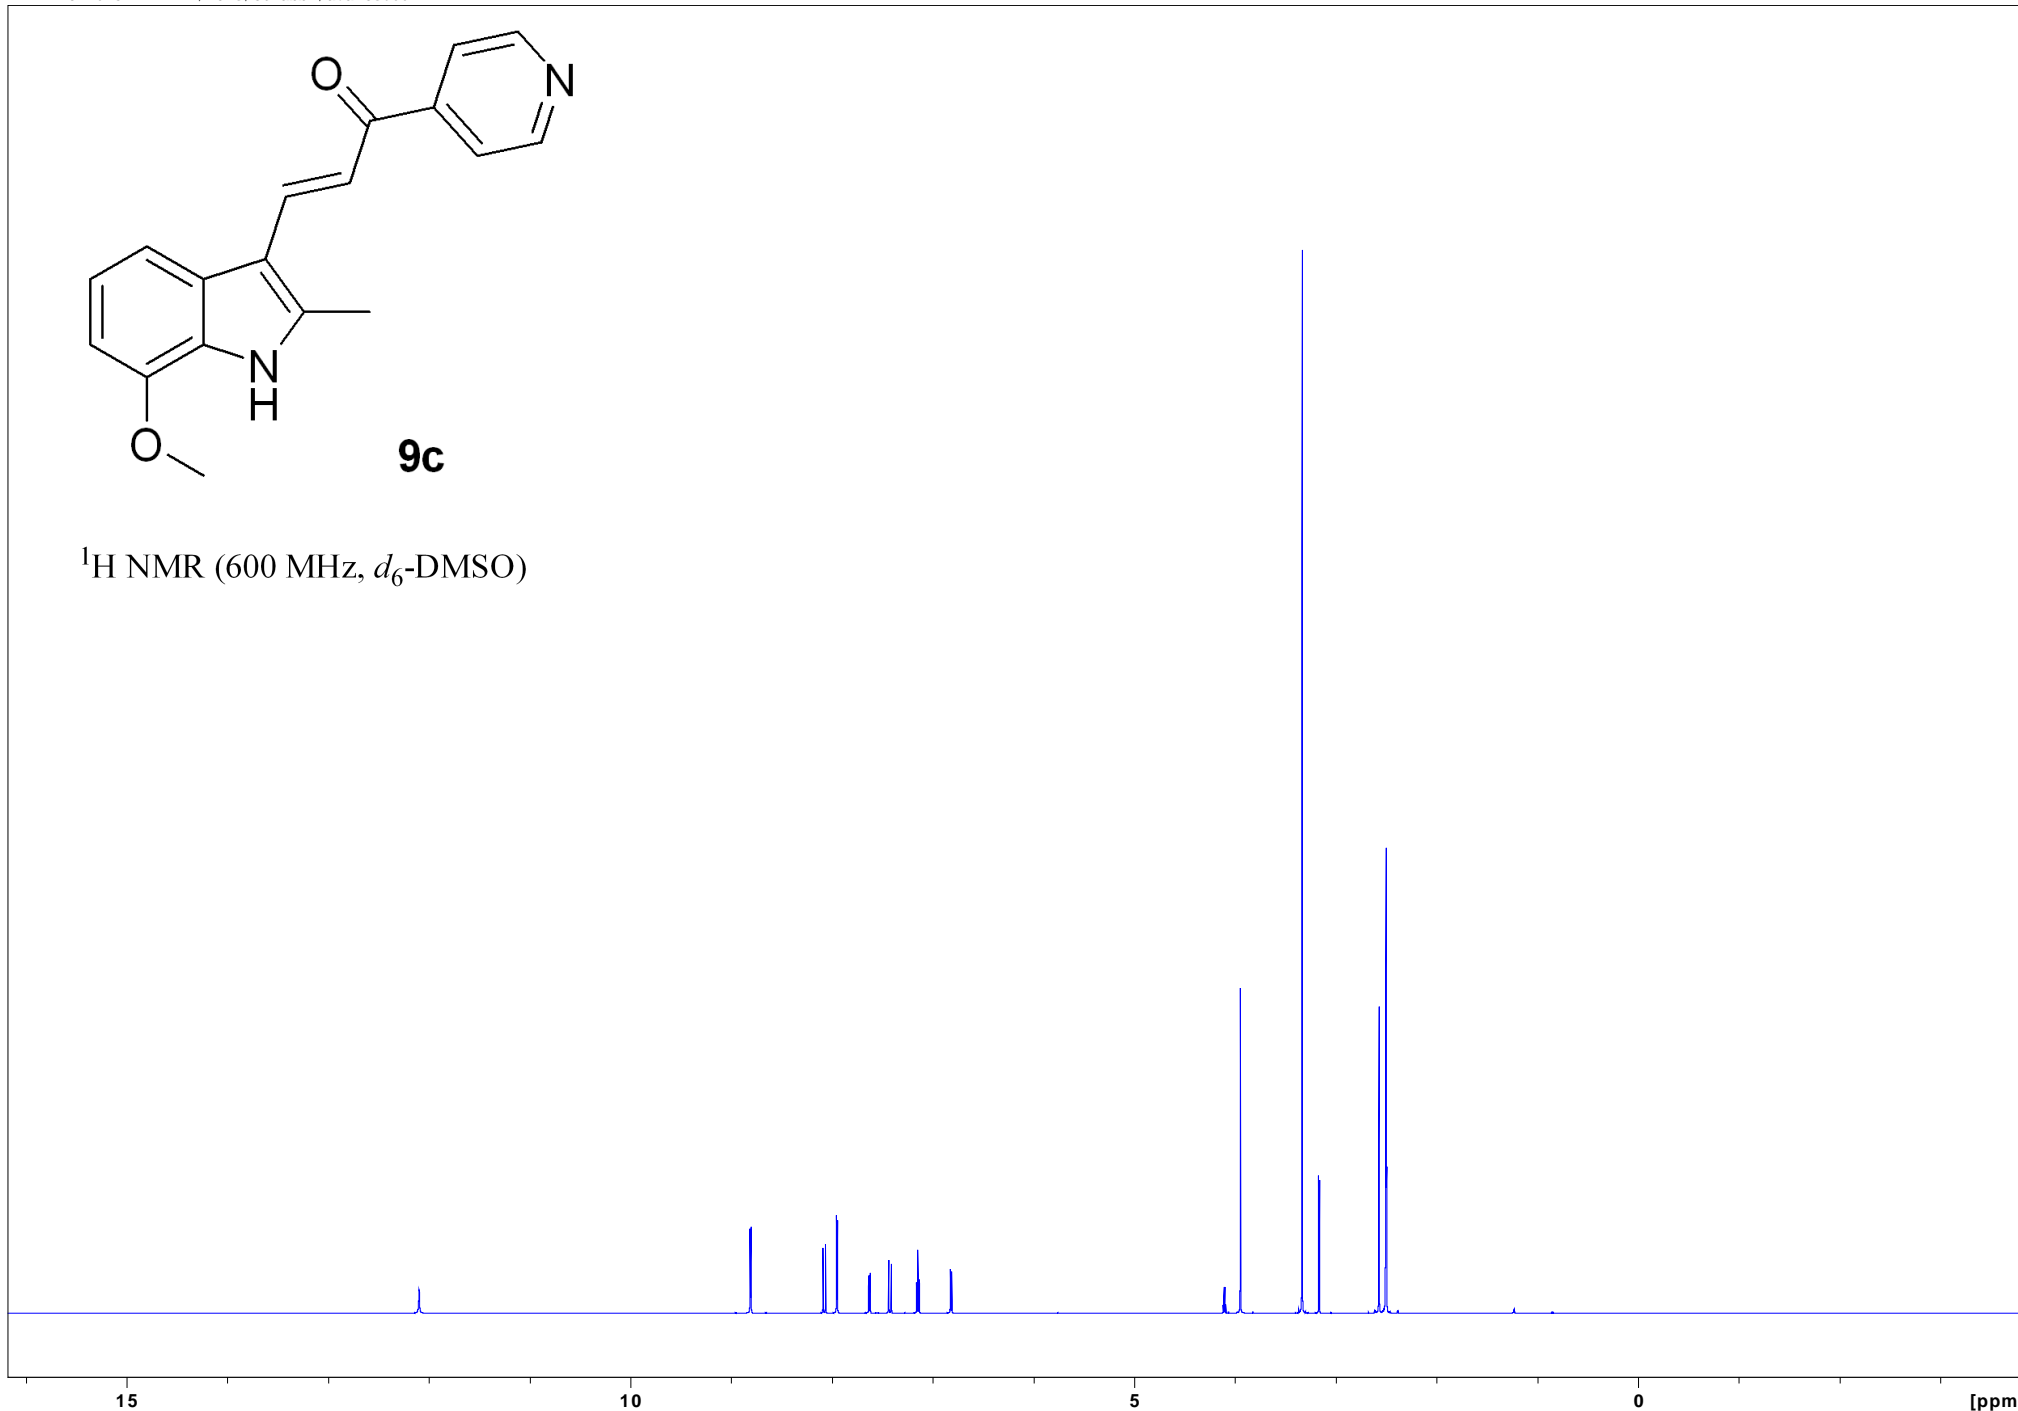

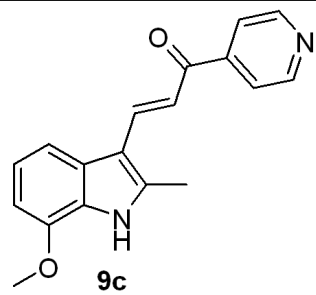

$^{13}\text{C}$  NMR (150 MHz,  $d_6$ -DMSO)

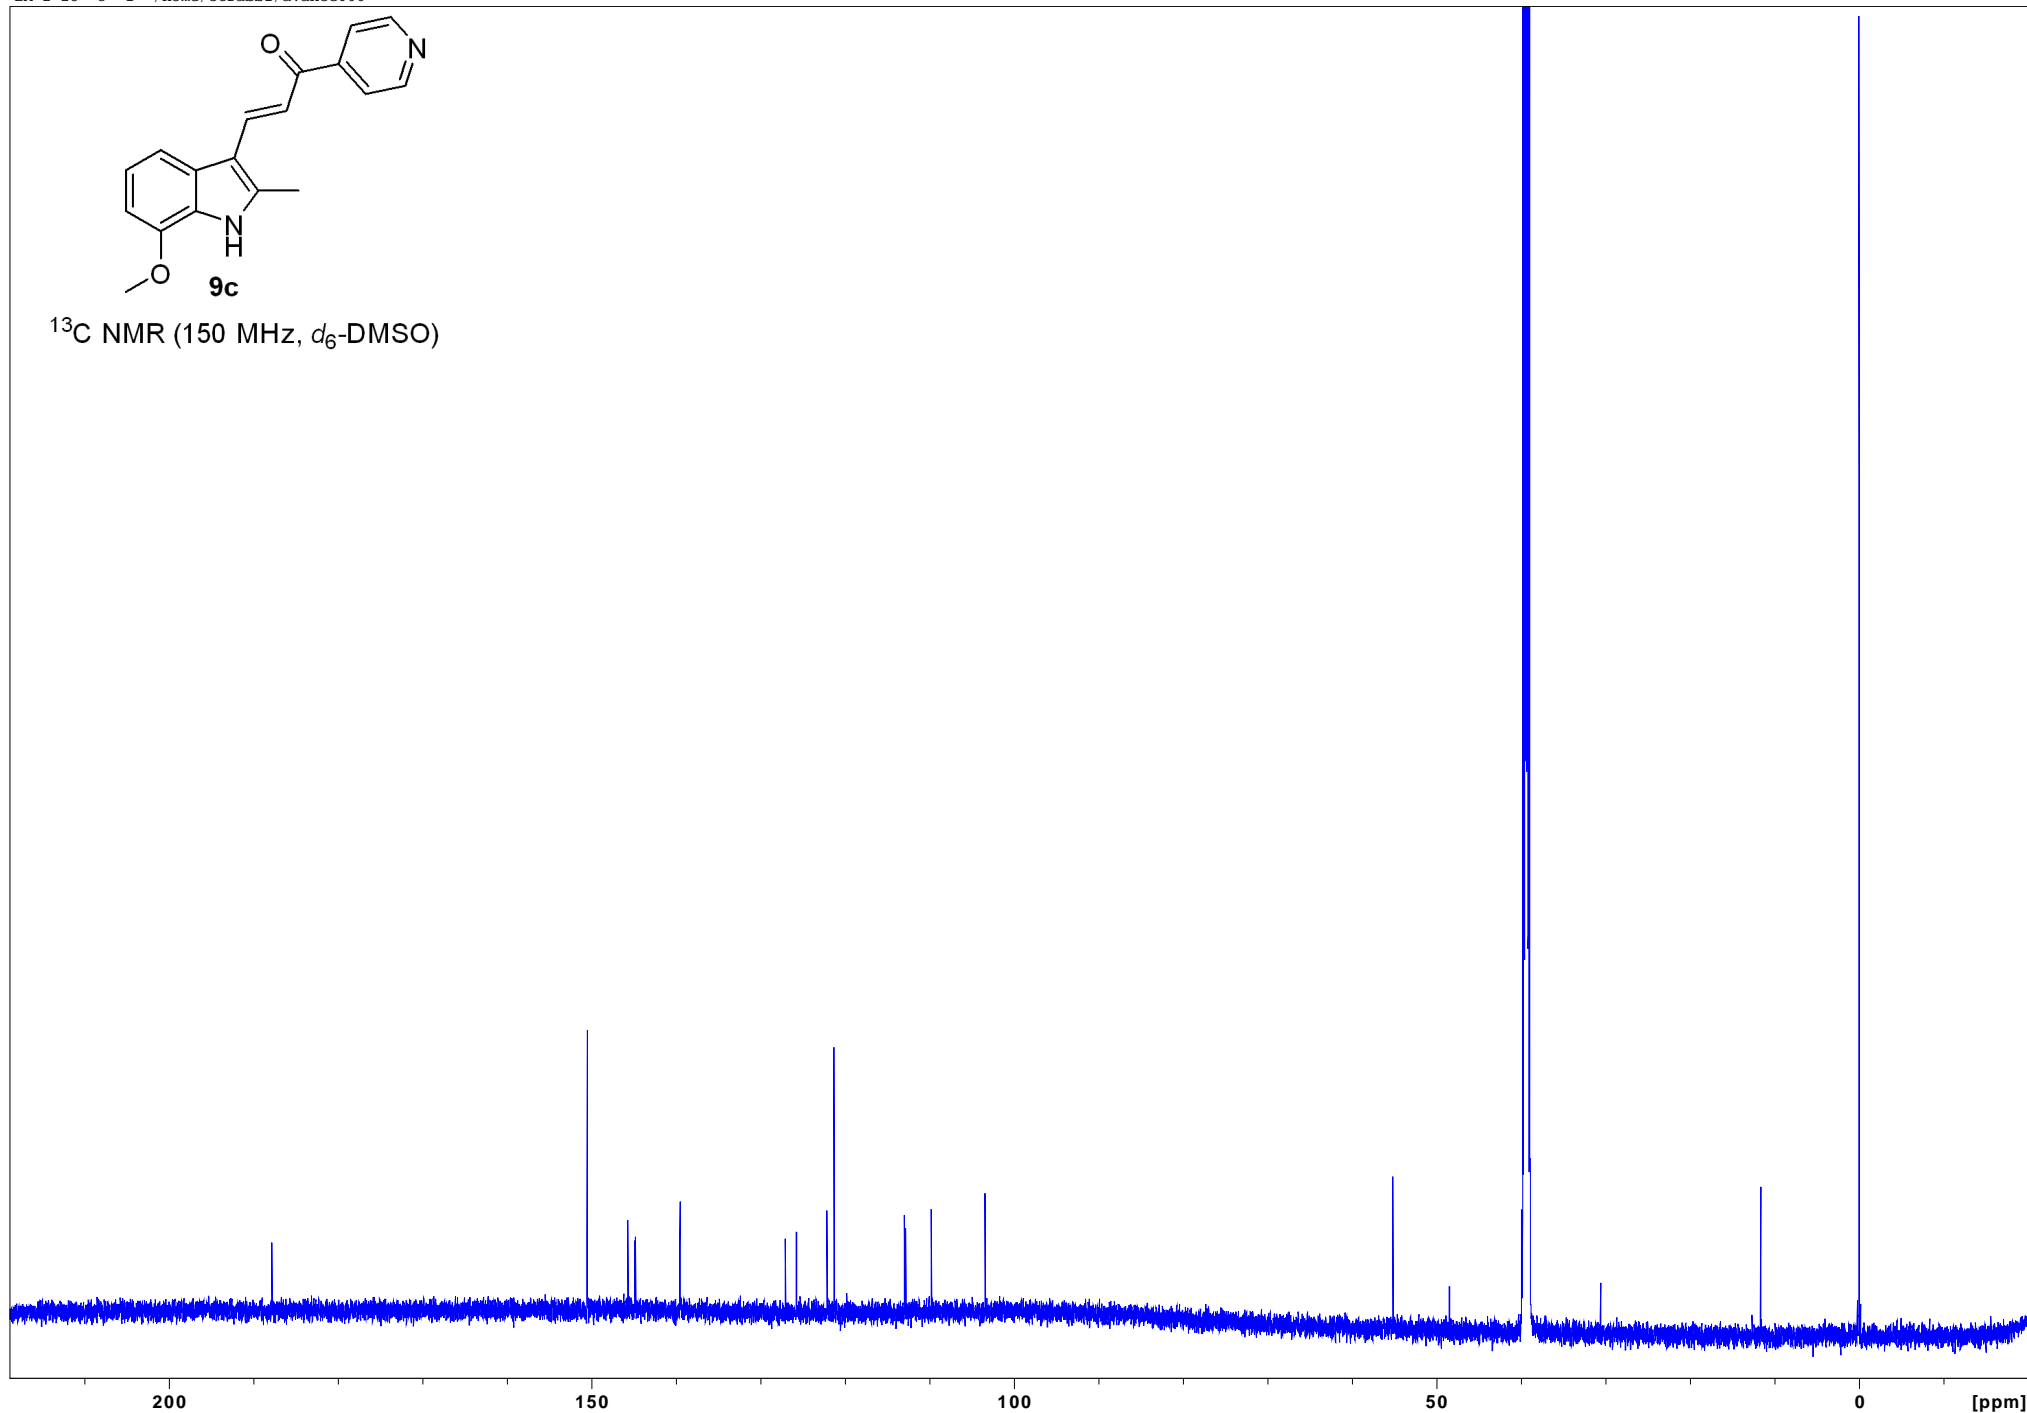

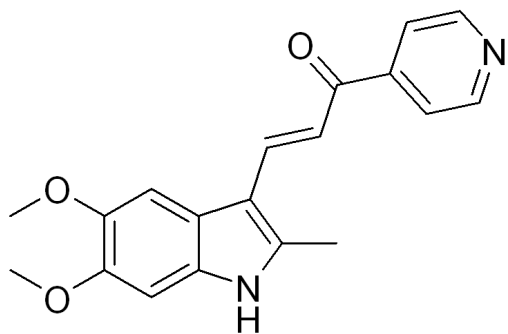

**9d**

$^1\text{H NMR}$  (600 MHz,  $d_6$ -DMSO)

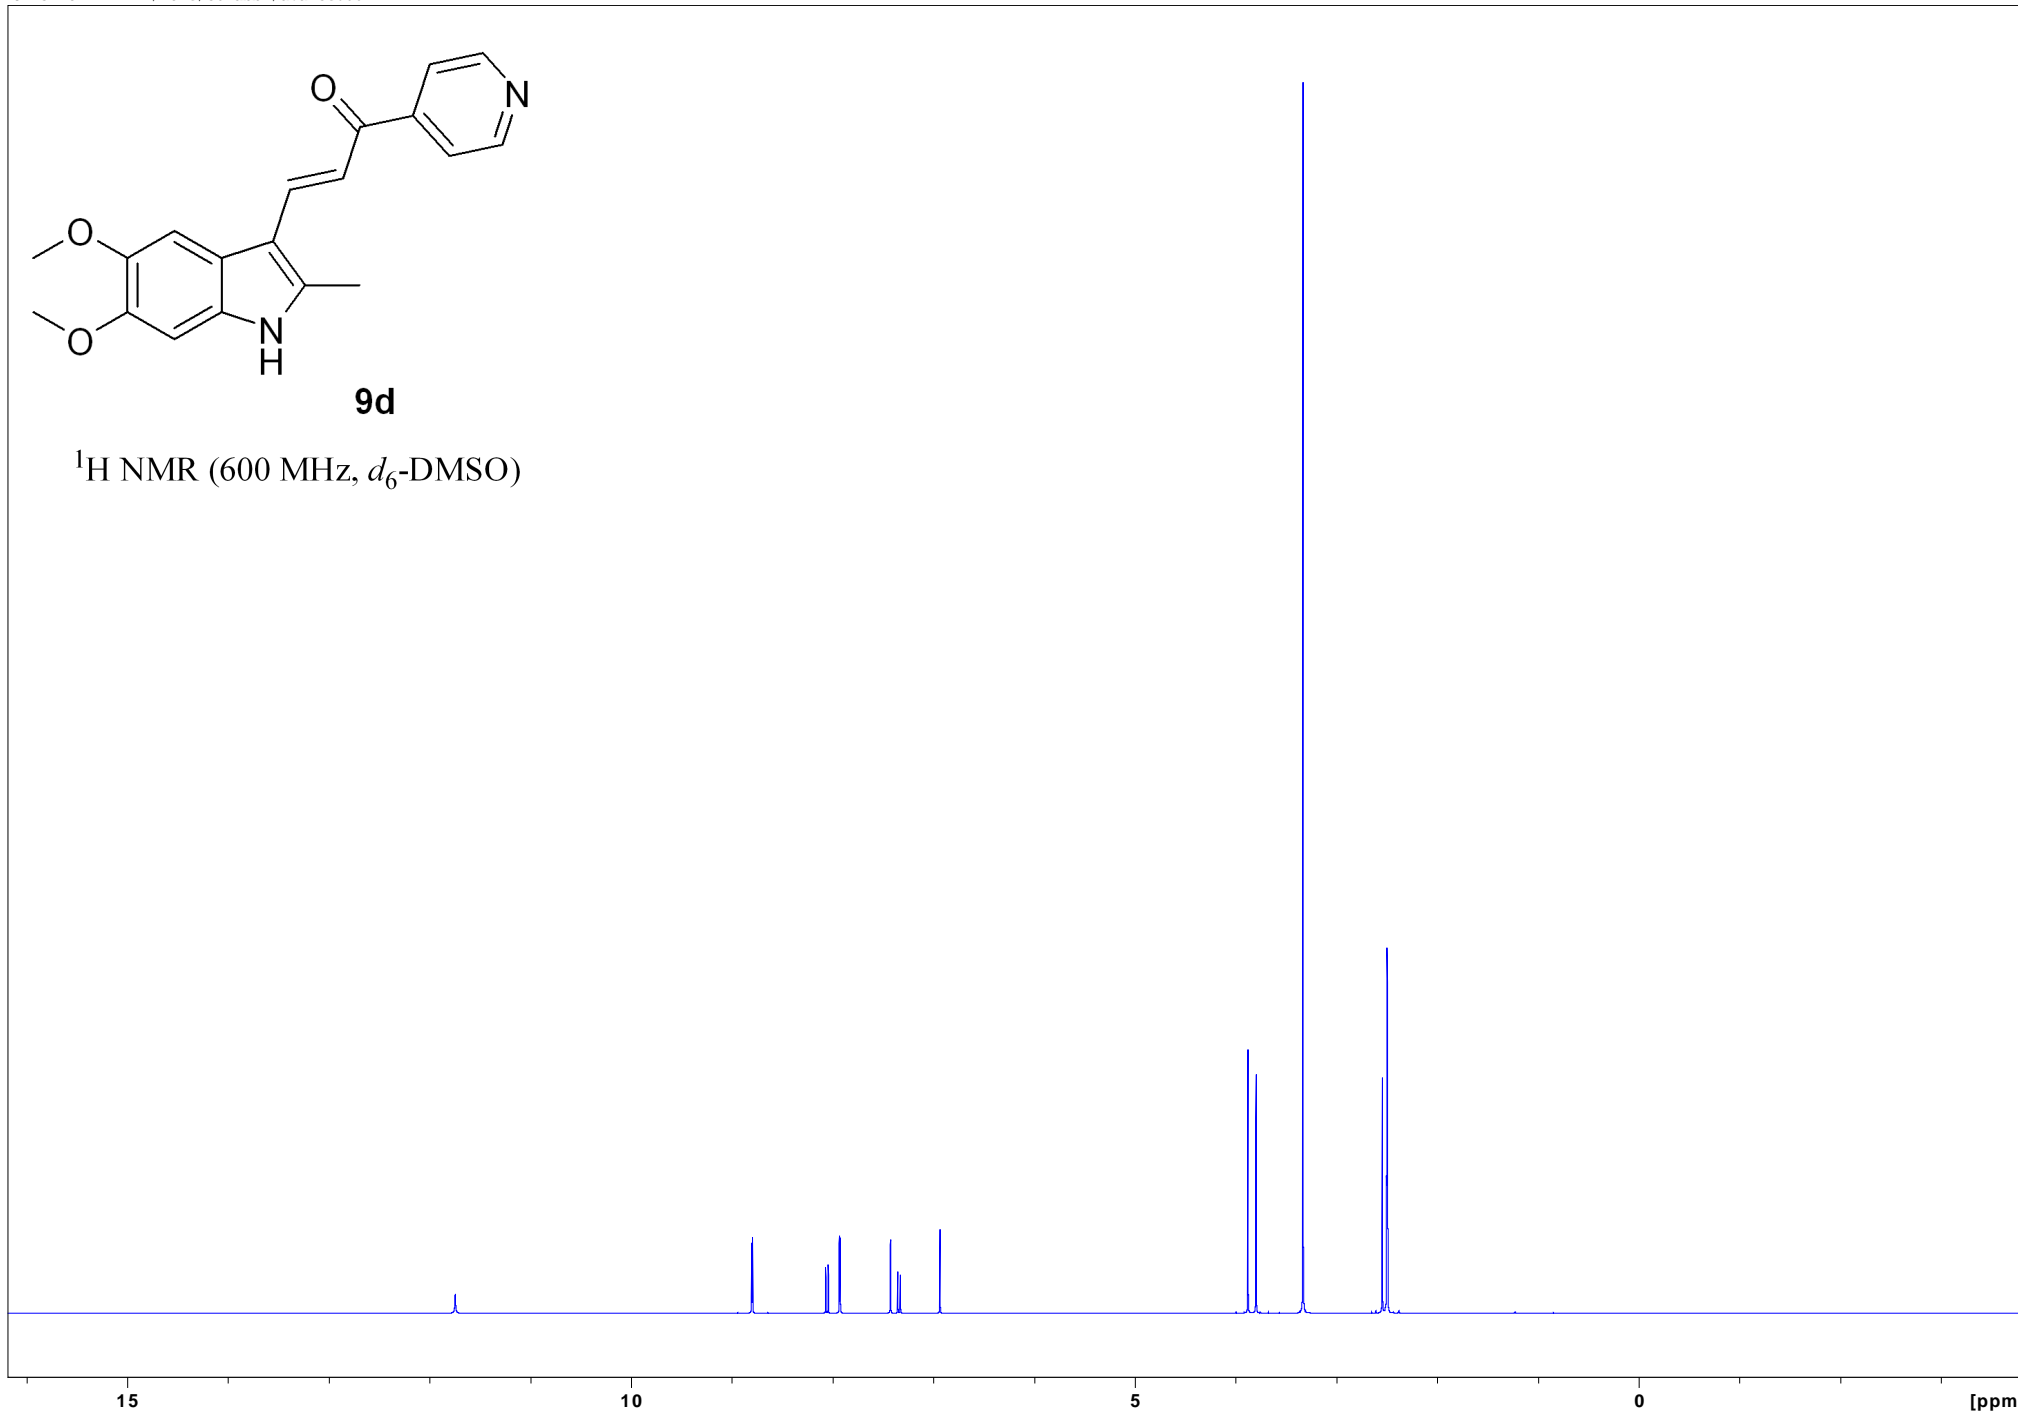

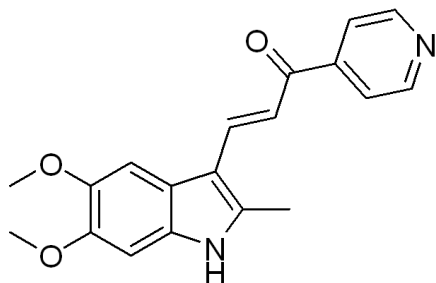

**9d**

$^{13}\text{C}$  NMR (150 MHz,  $d_6$ -DMSO)

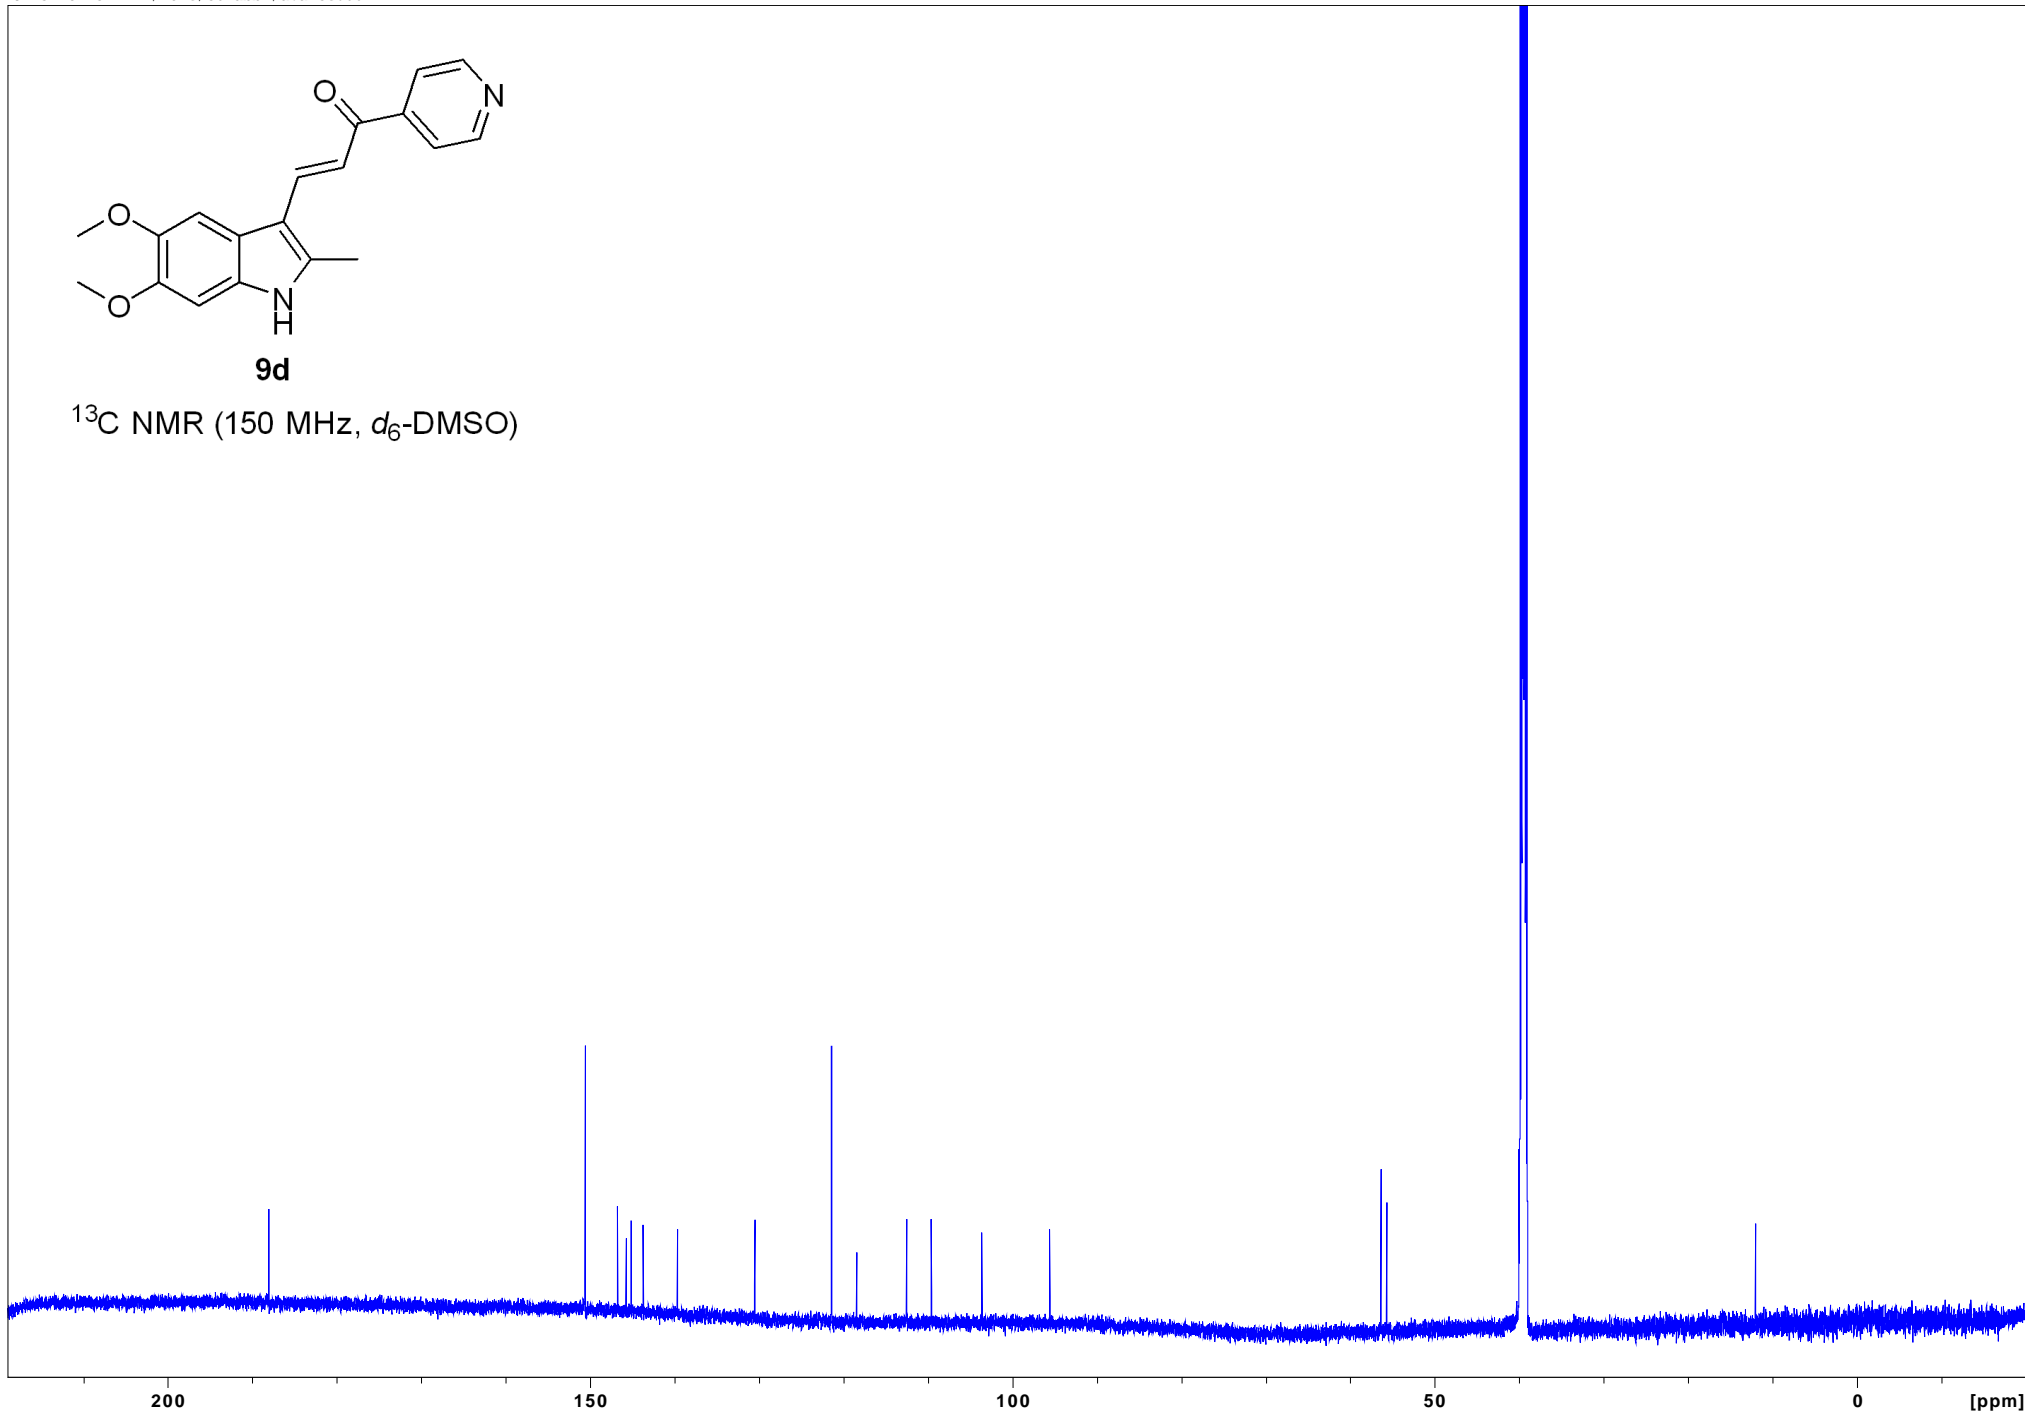

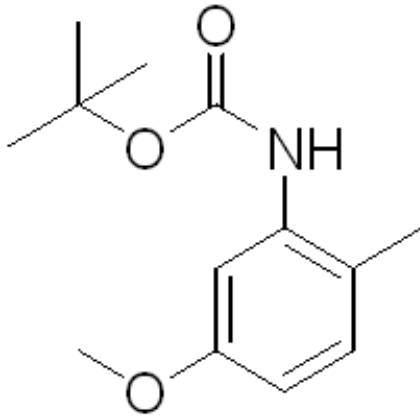

**11**

<sup>1</sup>H NMR (600 MHz, CDCl<sub>3</sub>)

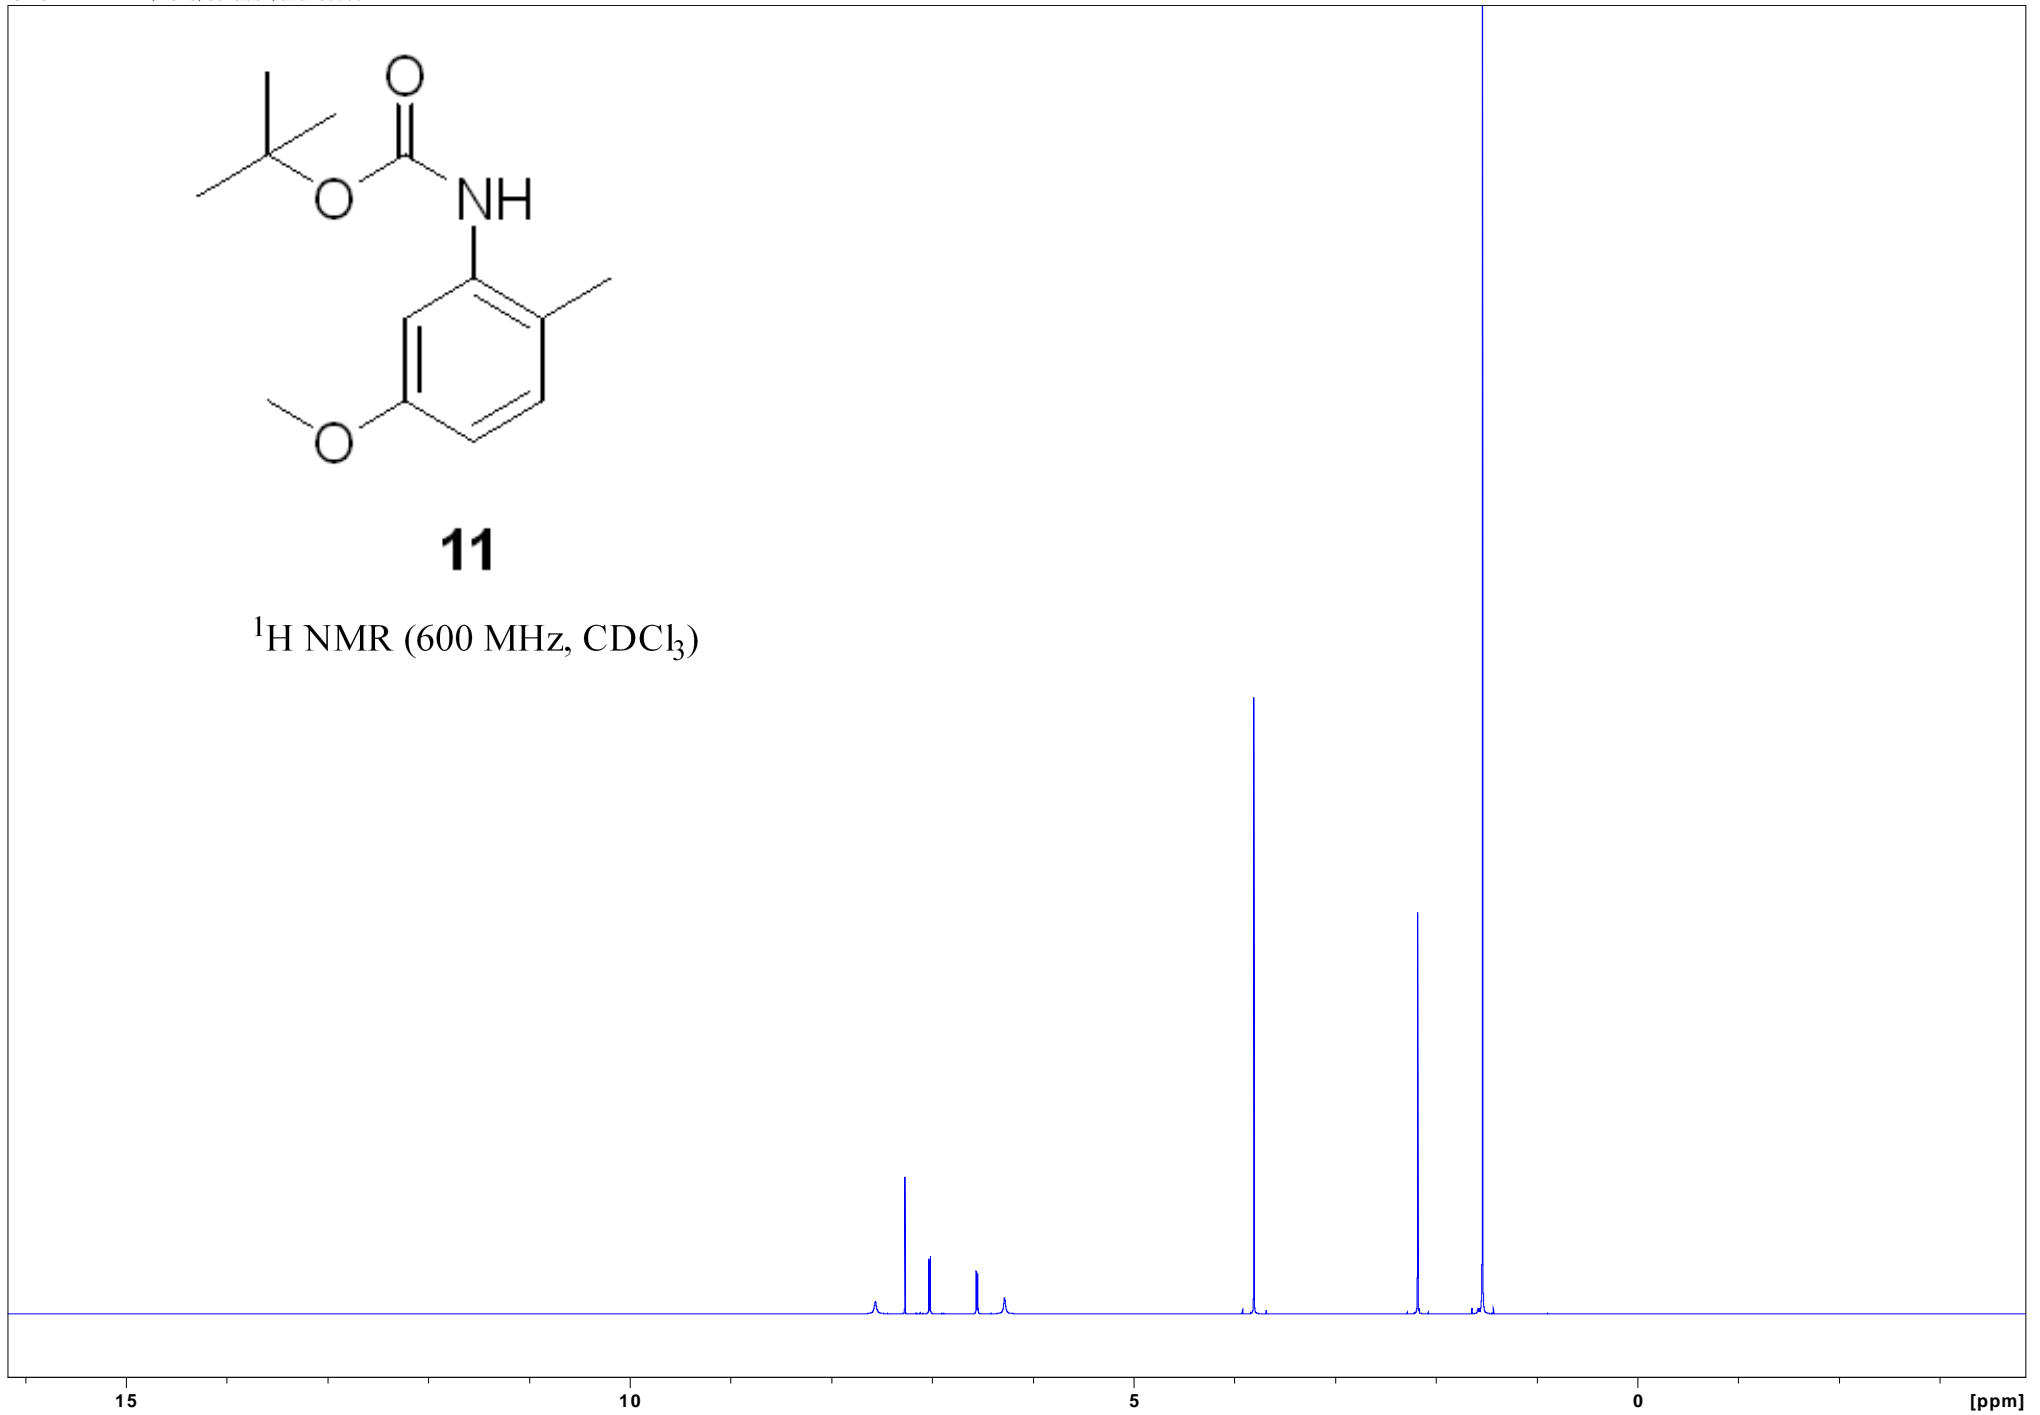



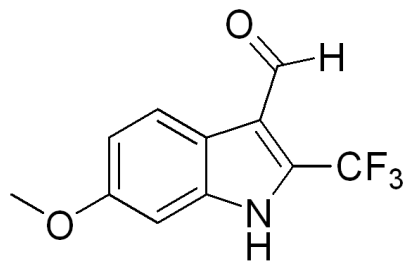

**14**

<sup>1</sup>H NMR (600 MHz, *d*<sub>6</sub>-acetone)

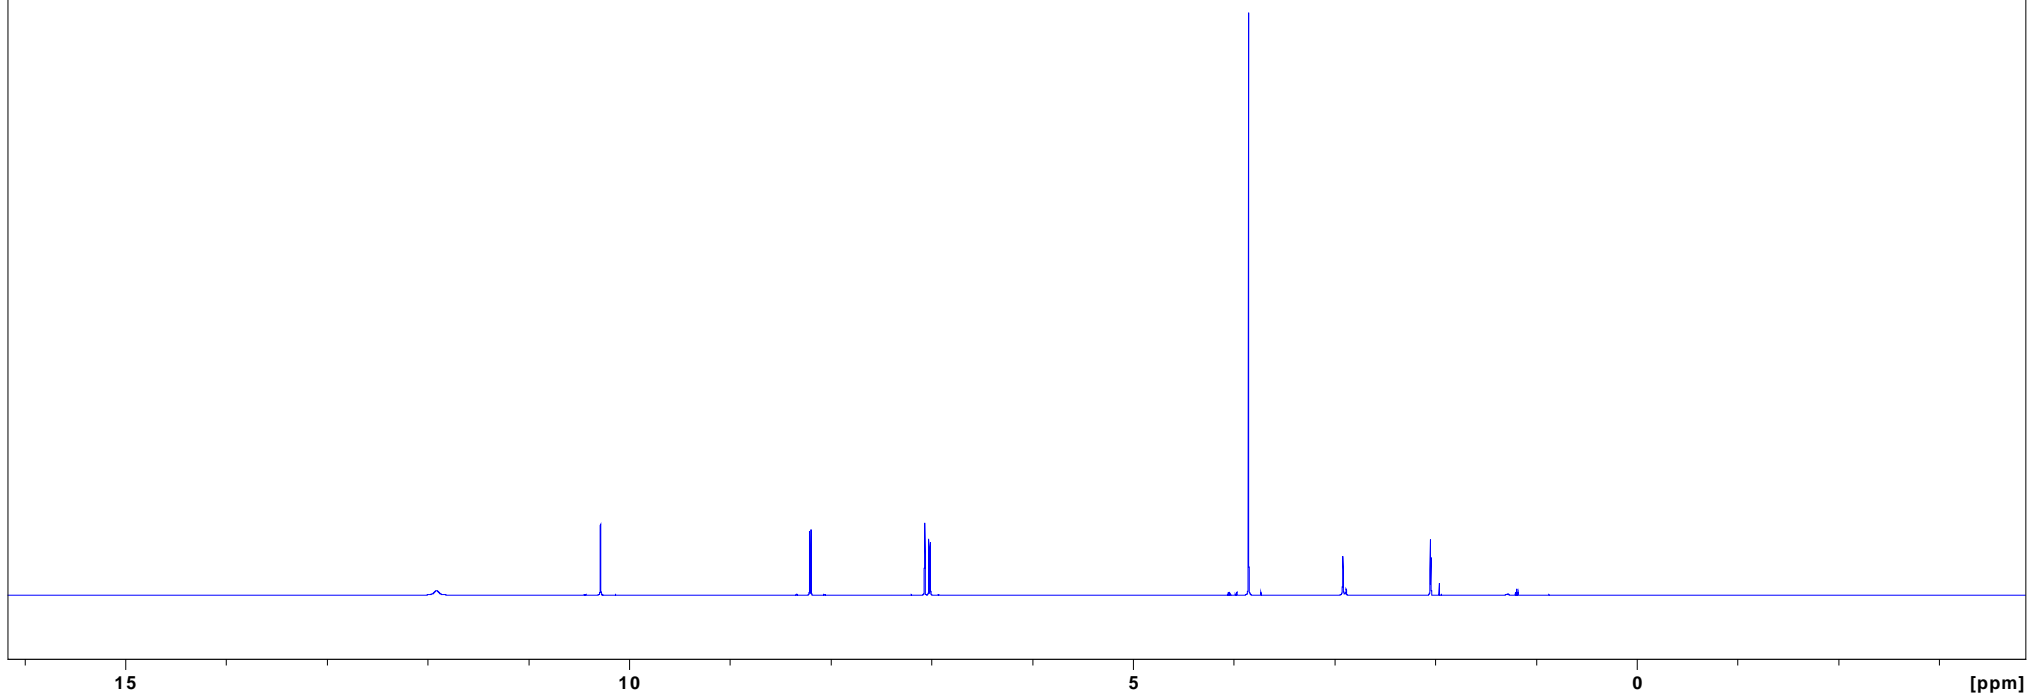

S31

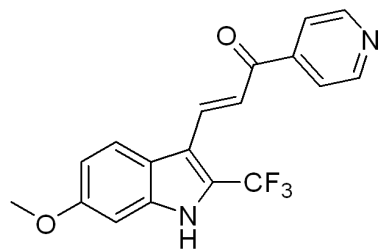

**15**

$^1\text{H}$  NMR (600 MHz,  $d_6$ -DMSO)

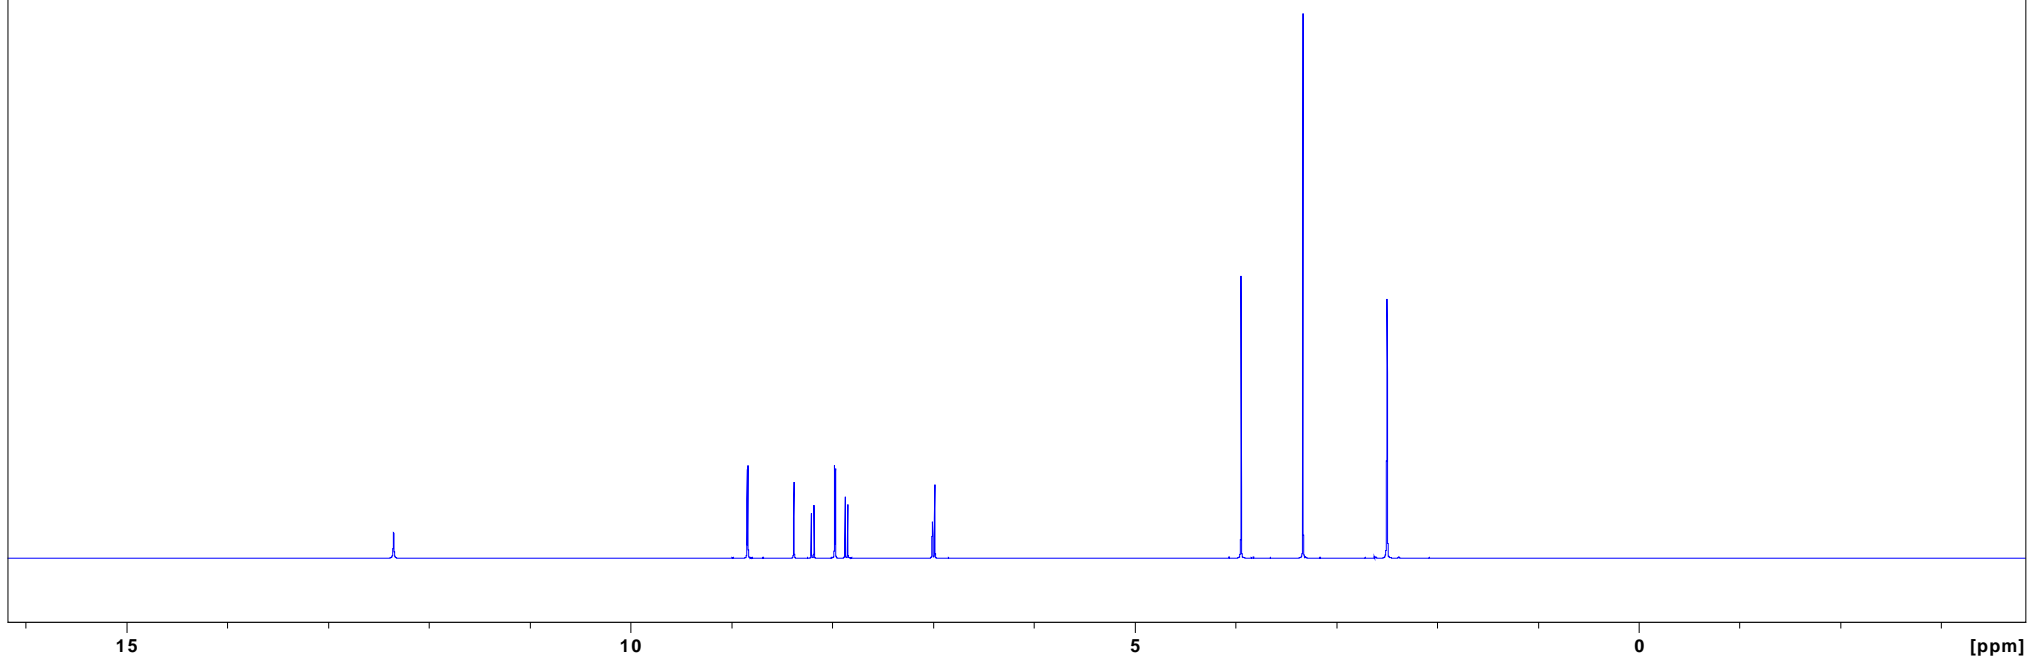



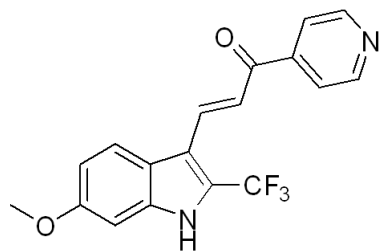

**15**

$^{13}\text{C}$  NMR (150 MHz,  $d_6$ -DMSO)

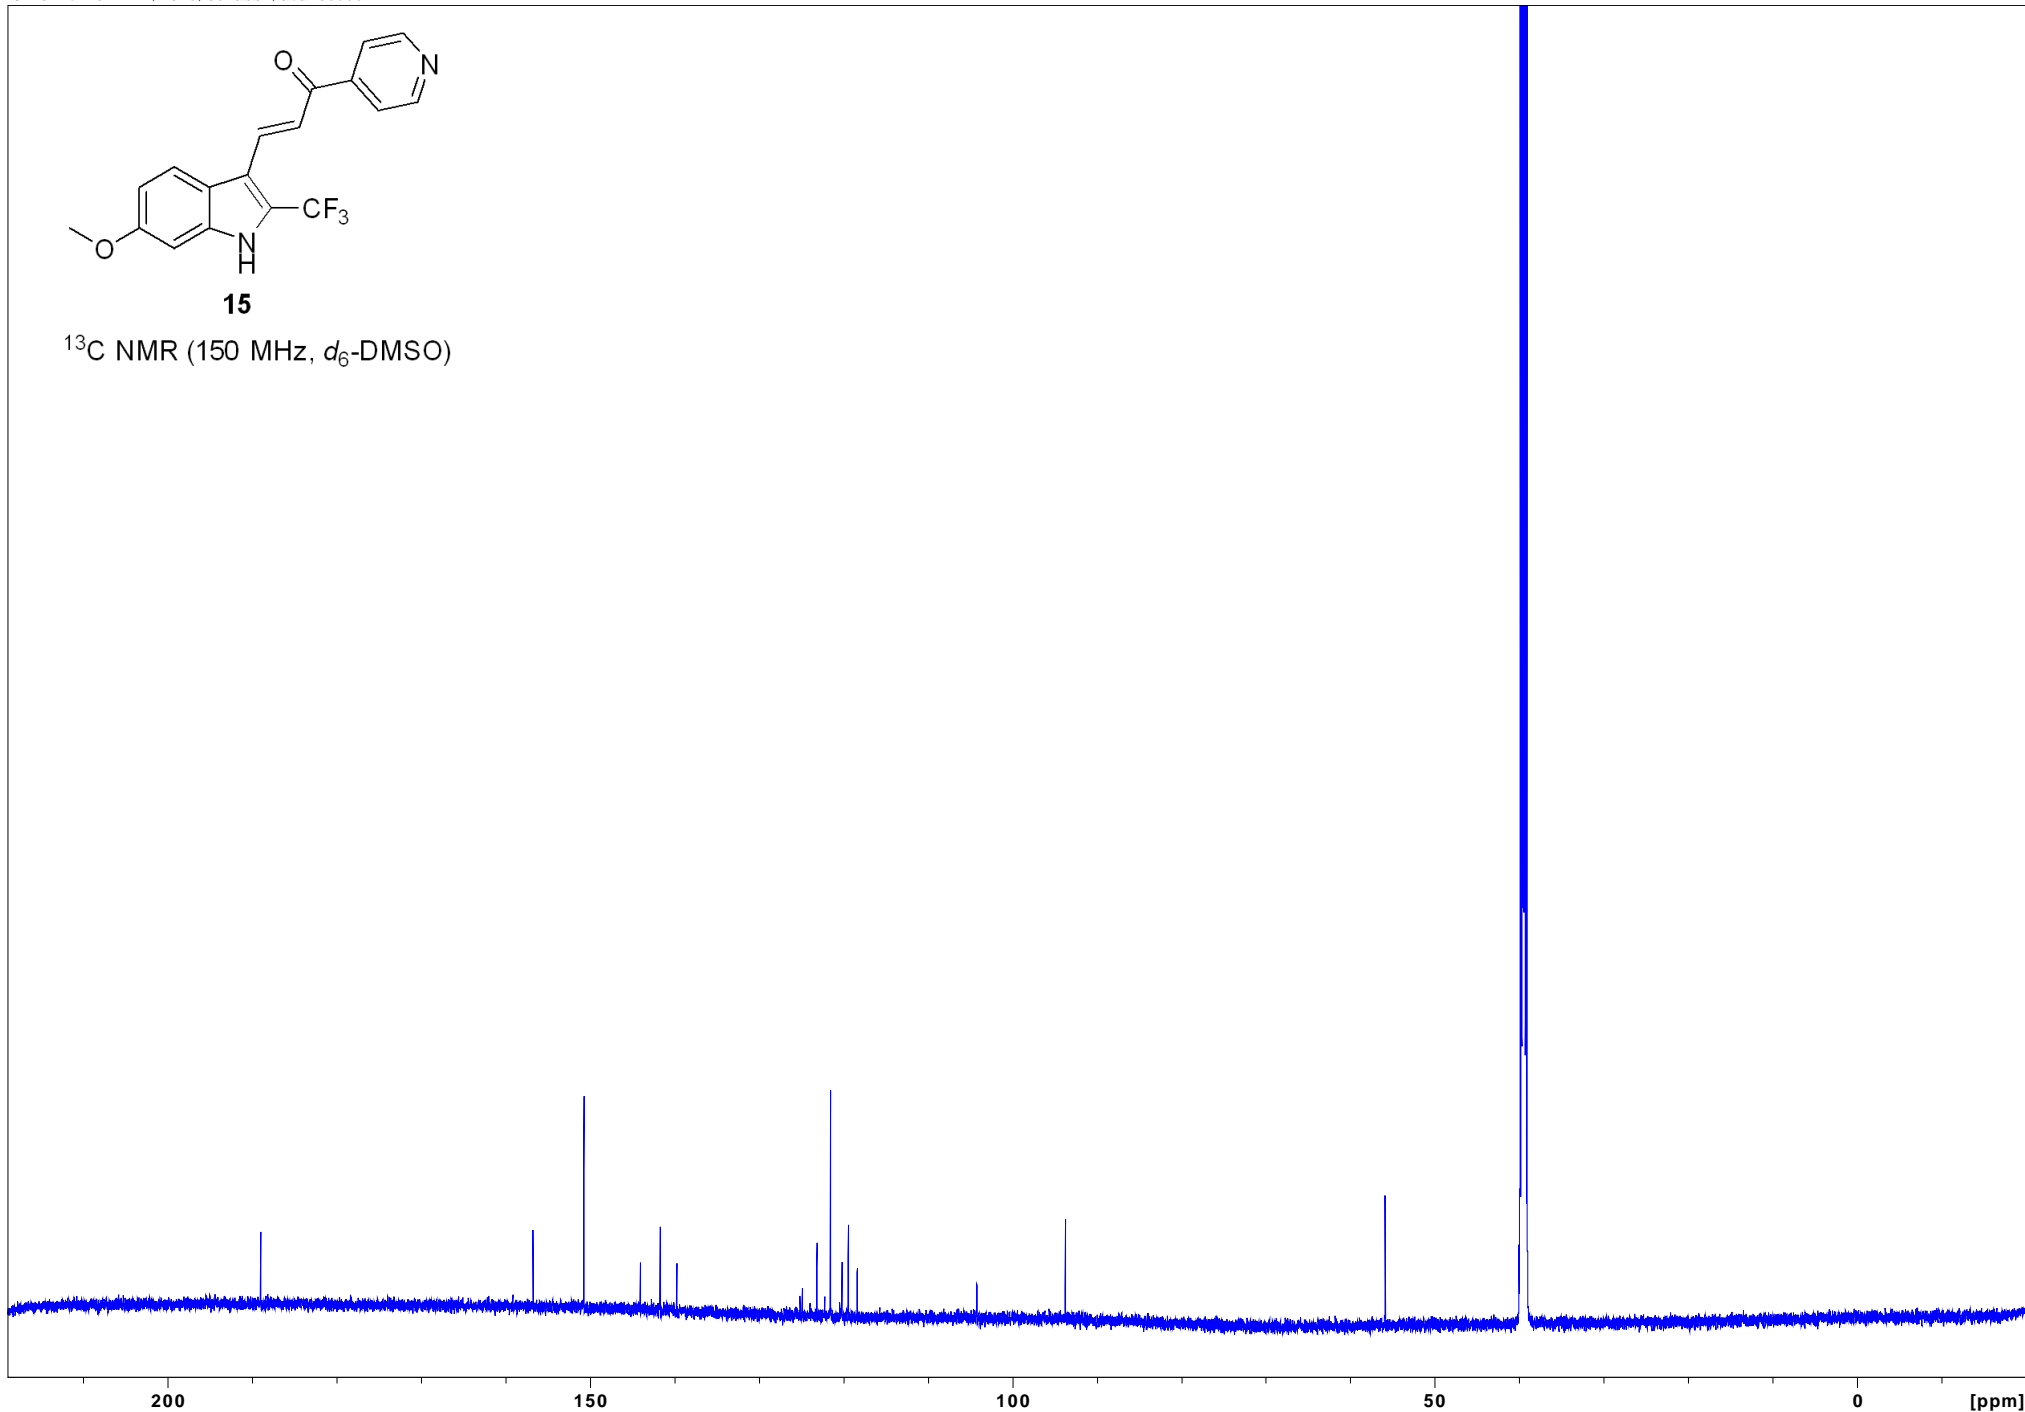

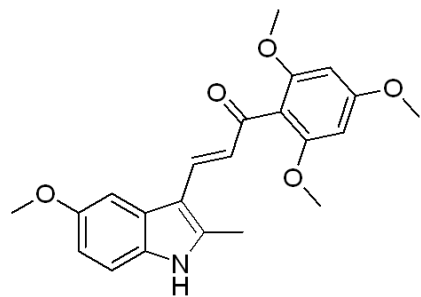

17

$^1\text{H}$  NMR (600 MHz,  $d_6$ -DMSO)

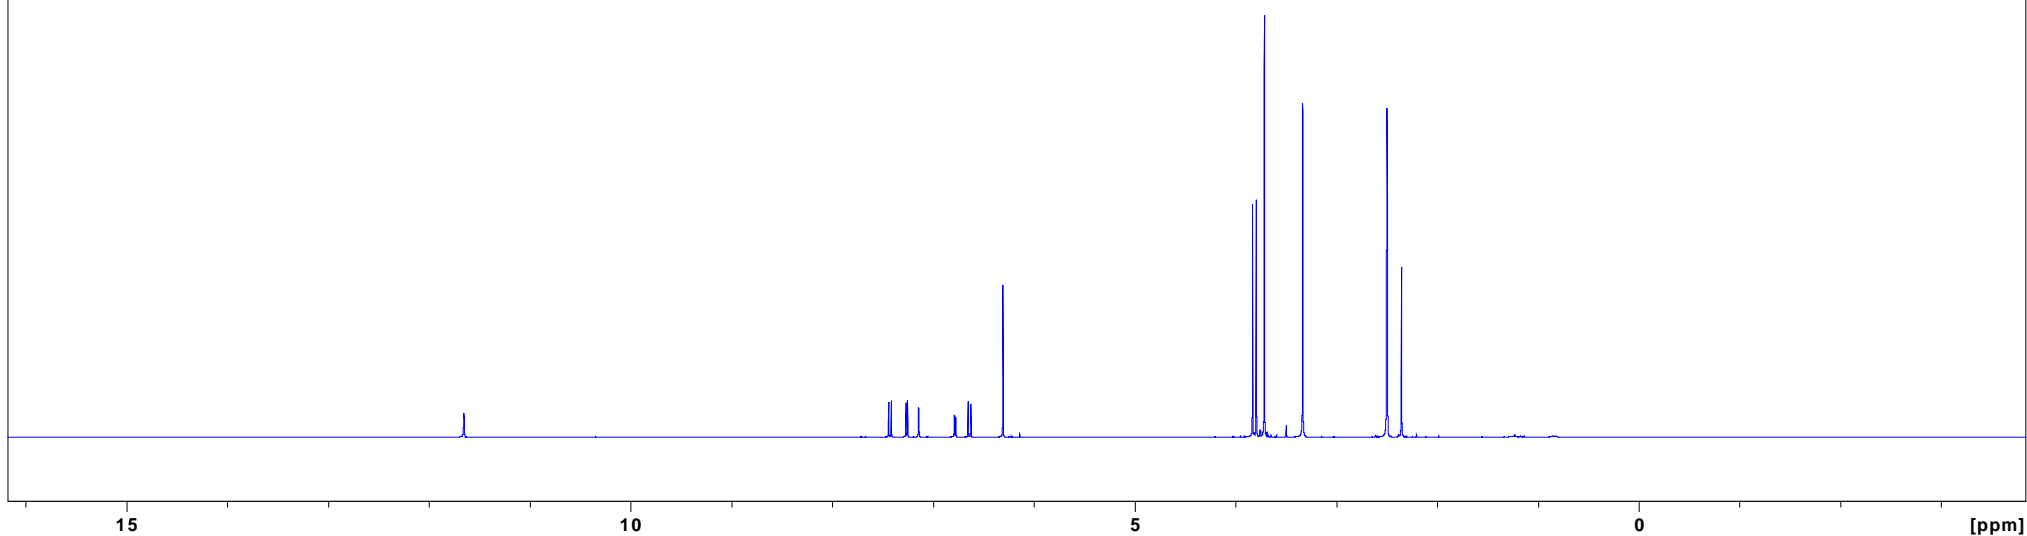

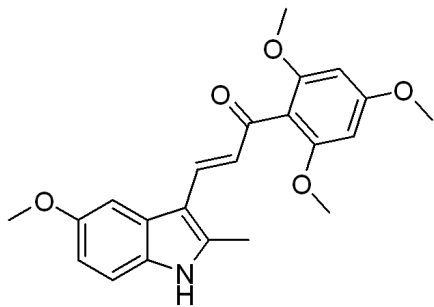

17

$^{13}\text{C}$  NMR (150 MHz,  $d_6$ -DMSO)

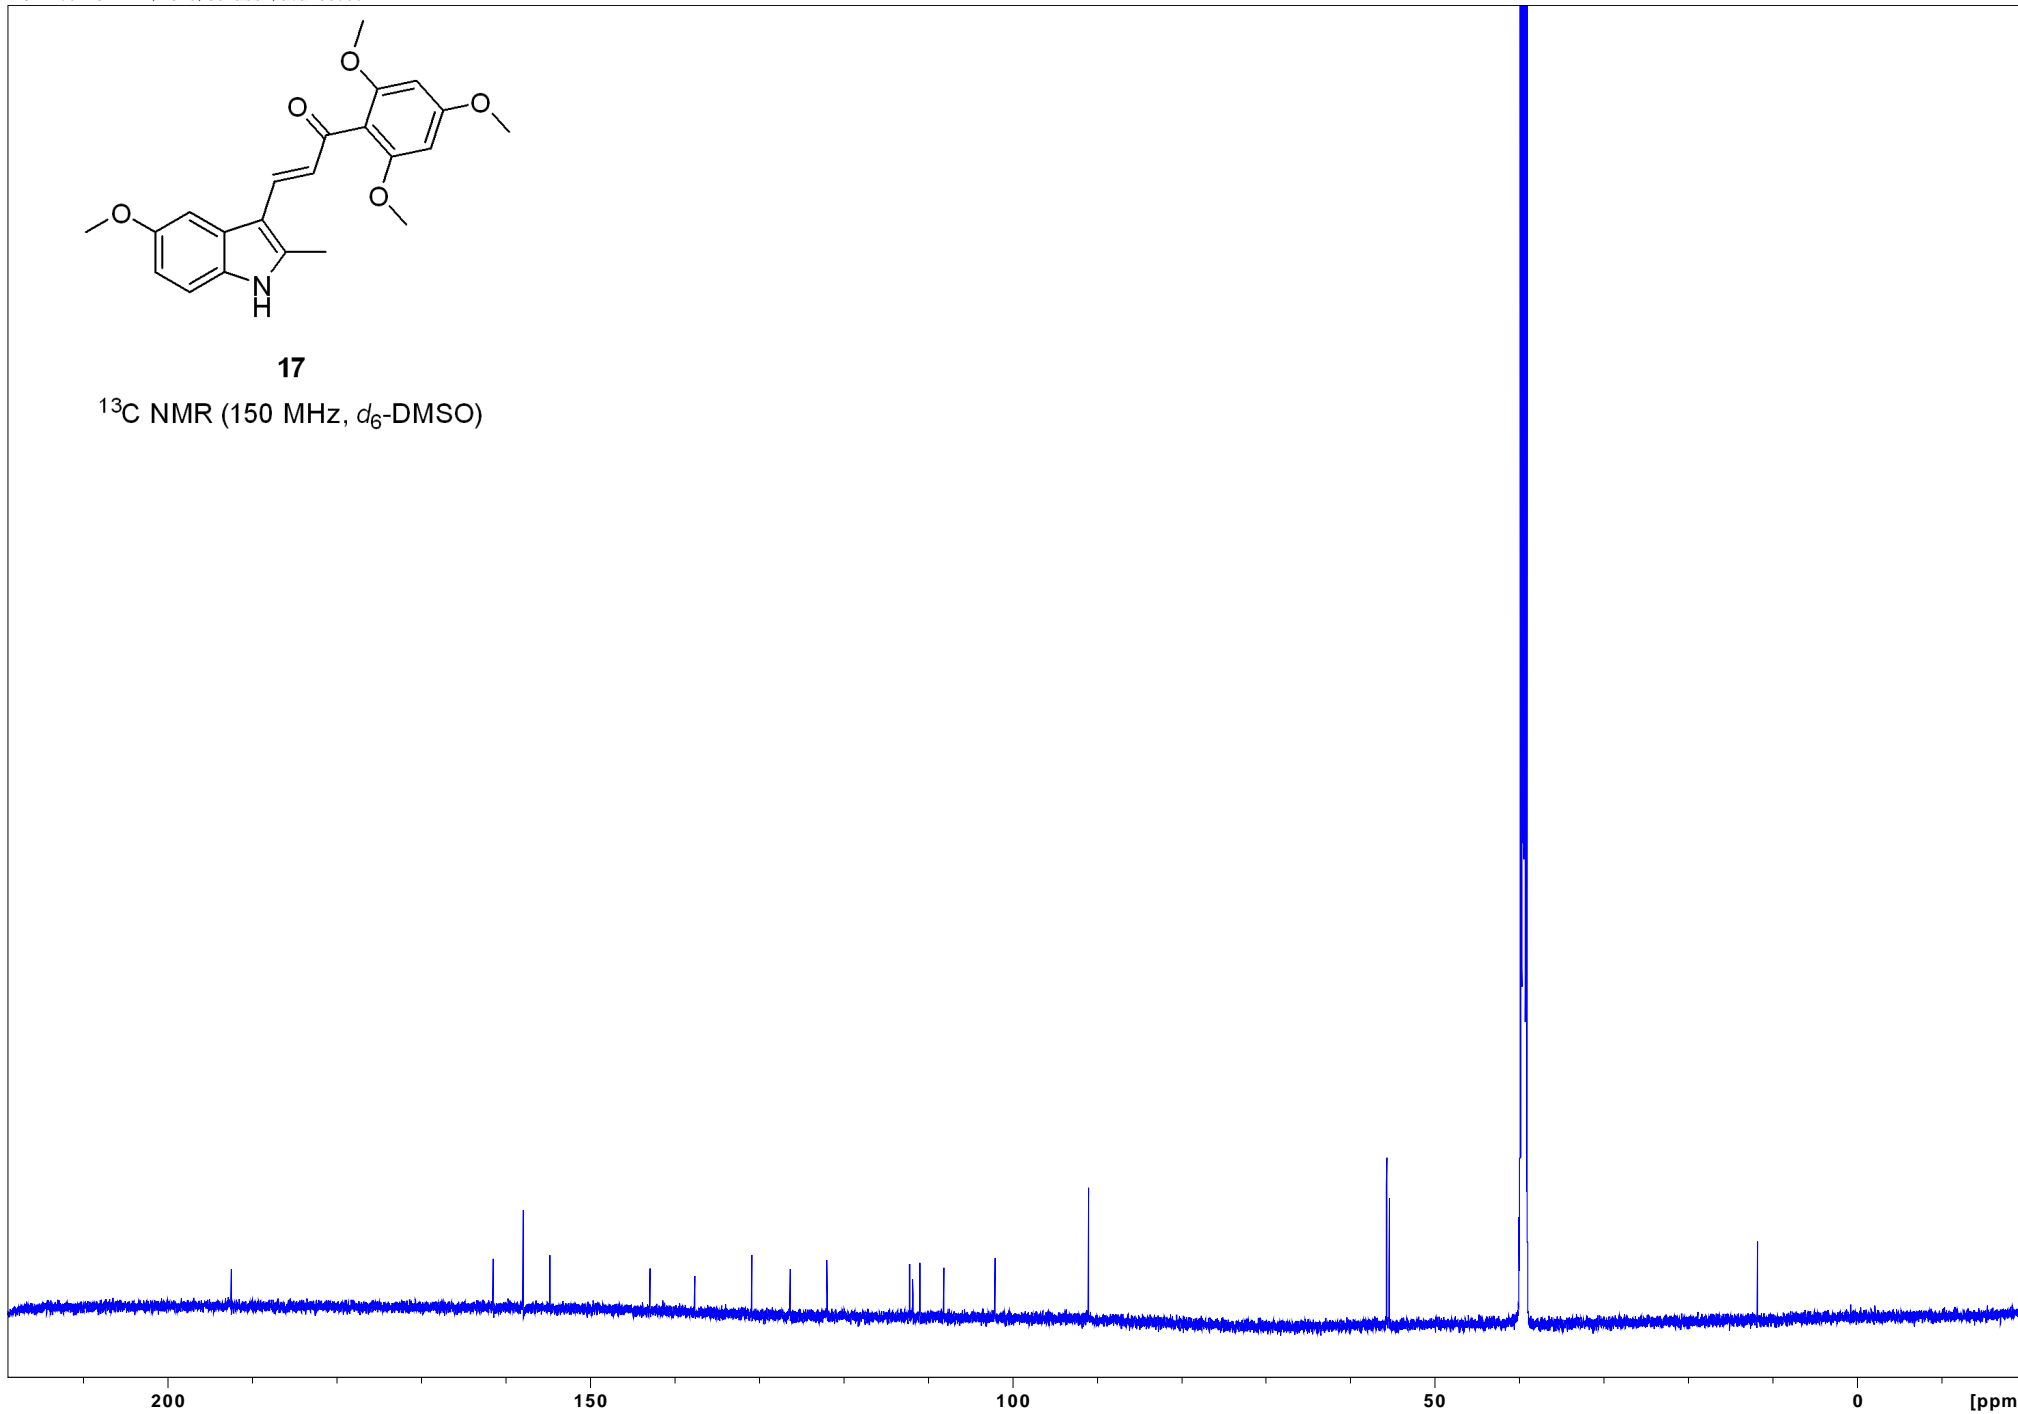

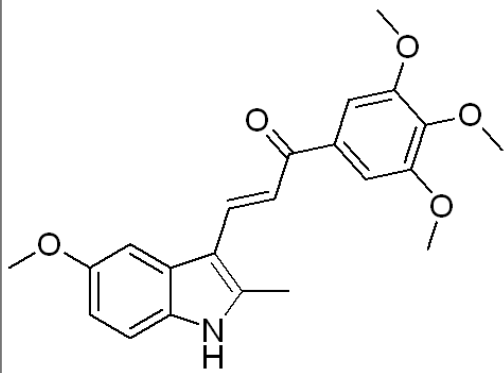

$^1\text{H}$  NMR (600 MHz,  $d_6$ -DMSO)

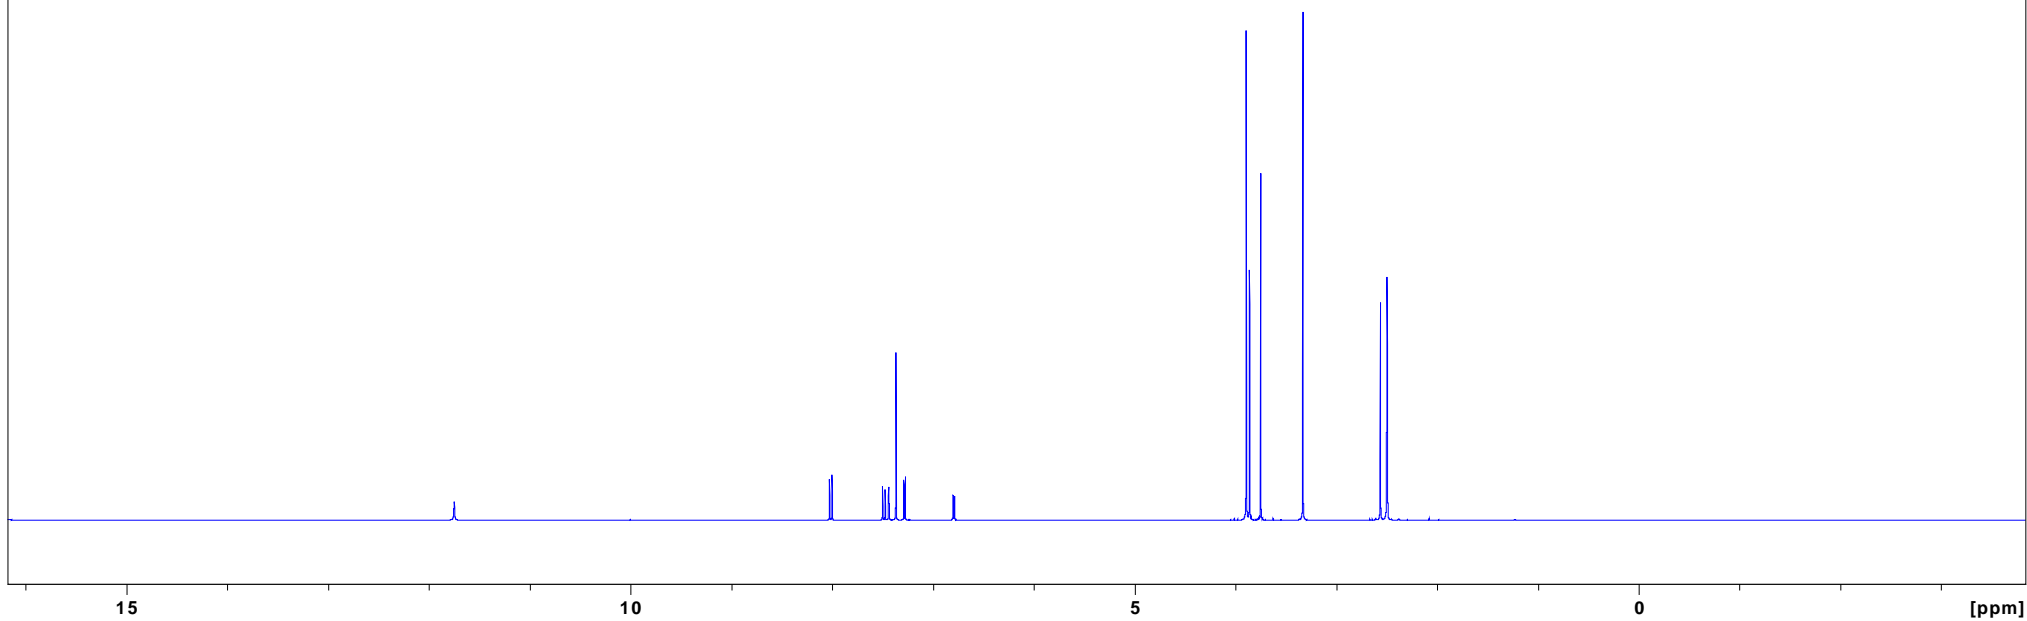

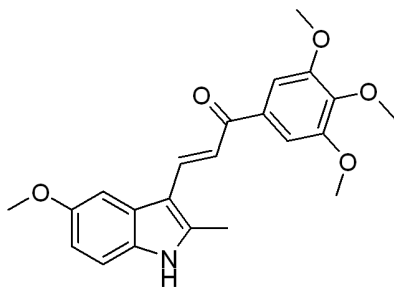

**18**

$^{13}\text{C}$  NMR (150 MHz,  $d_6$ -DMSO)

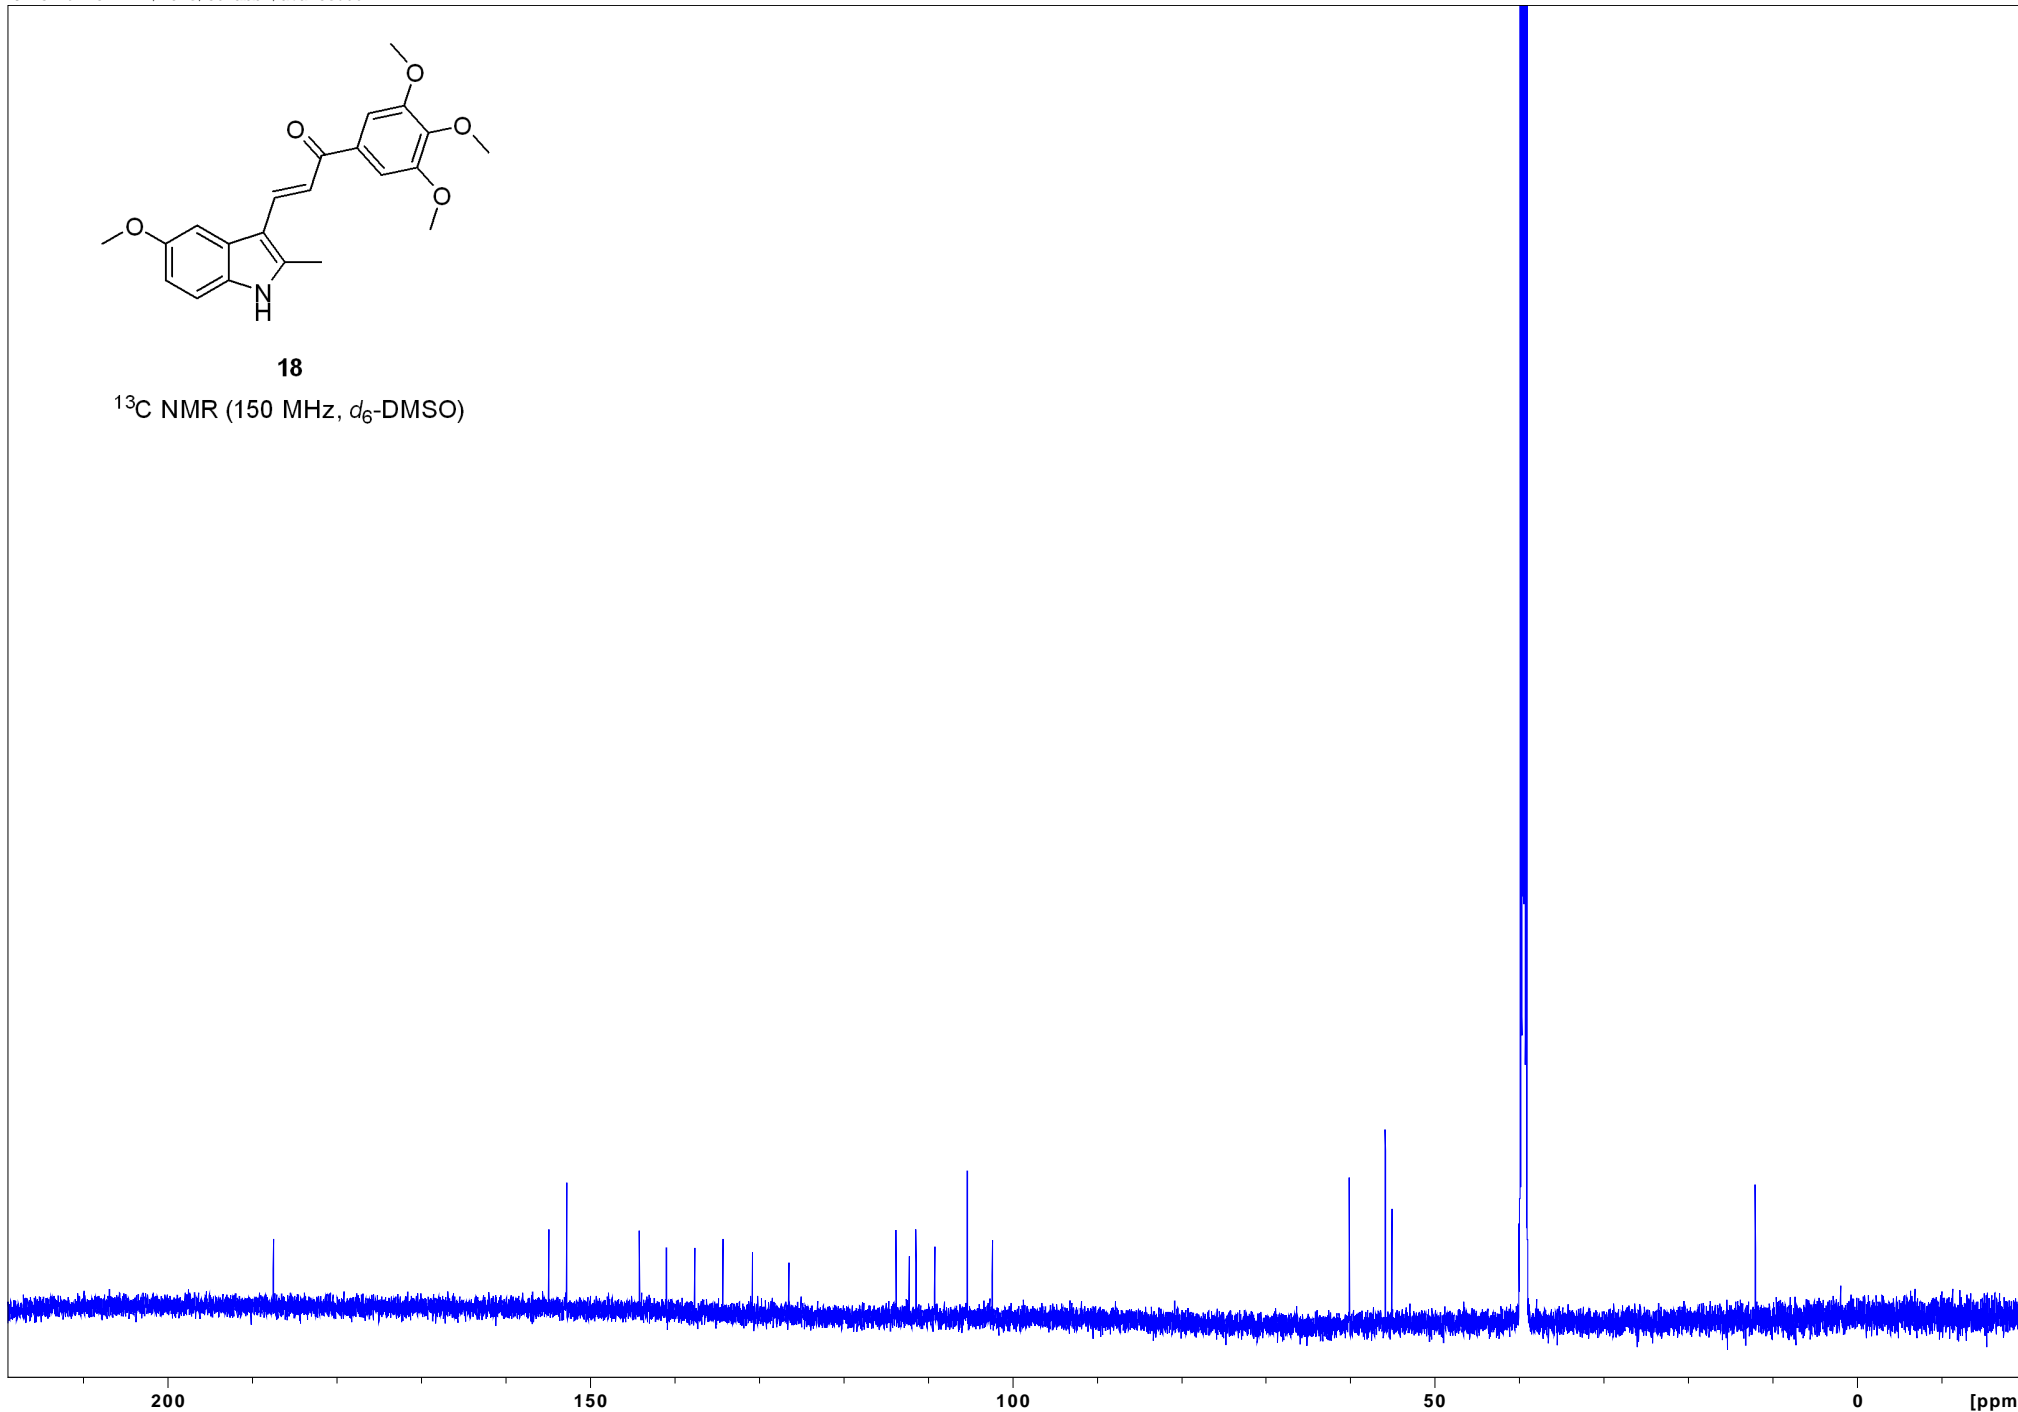

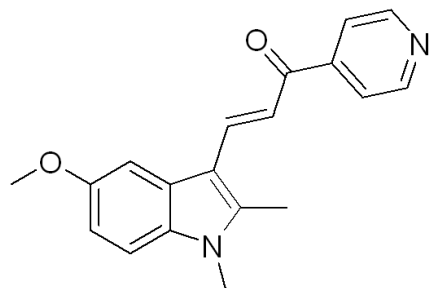

**19**

$^1\text{H}$  NMR (600 MHz,  $d_6$ -DMSO)

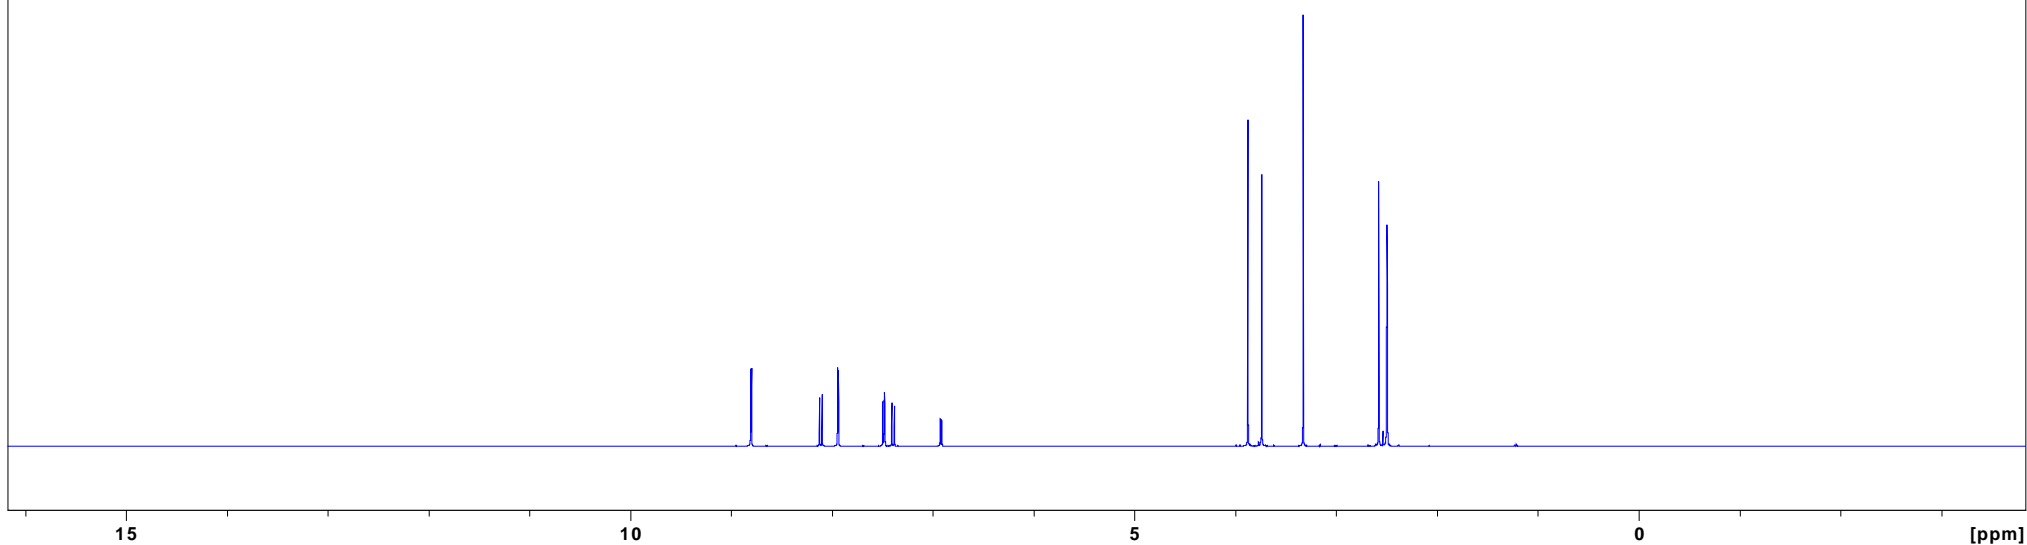

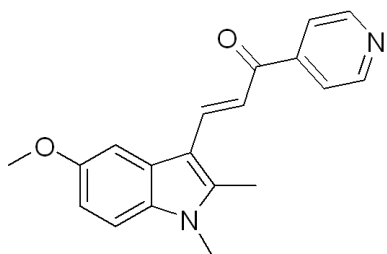

**19**

$^{13}\text{C}$  NMR (150 MHz,  $d_6$ -DMSO)

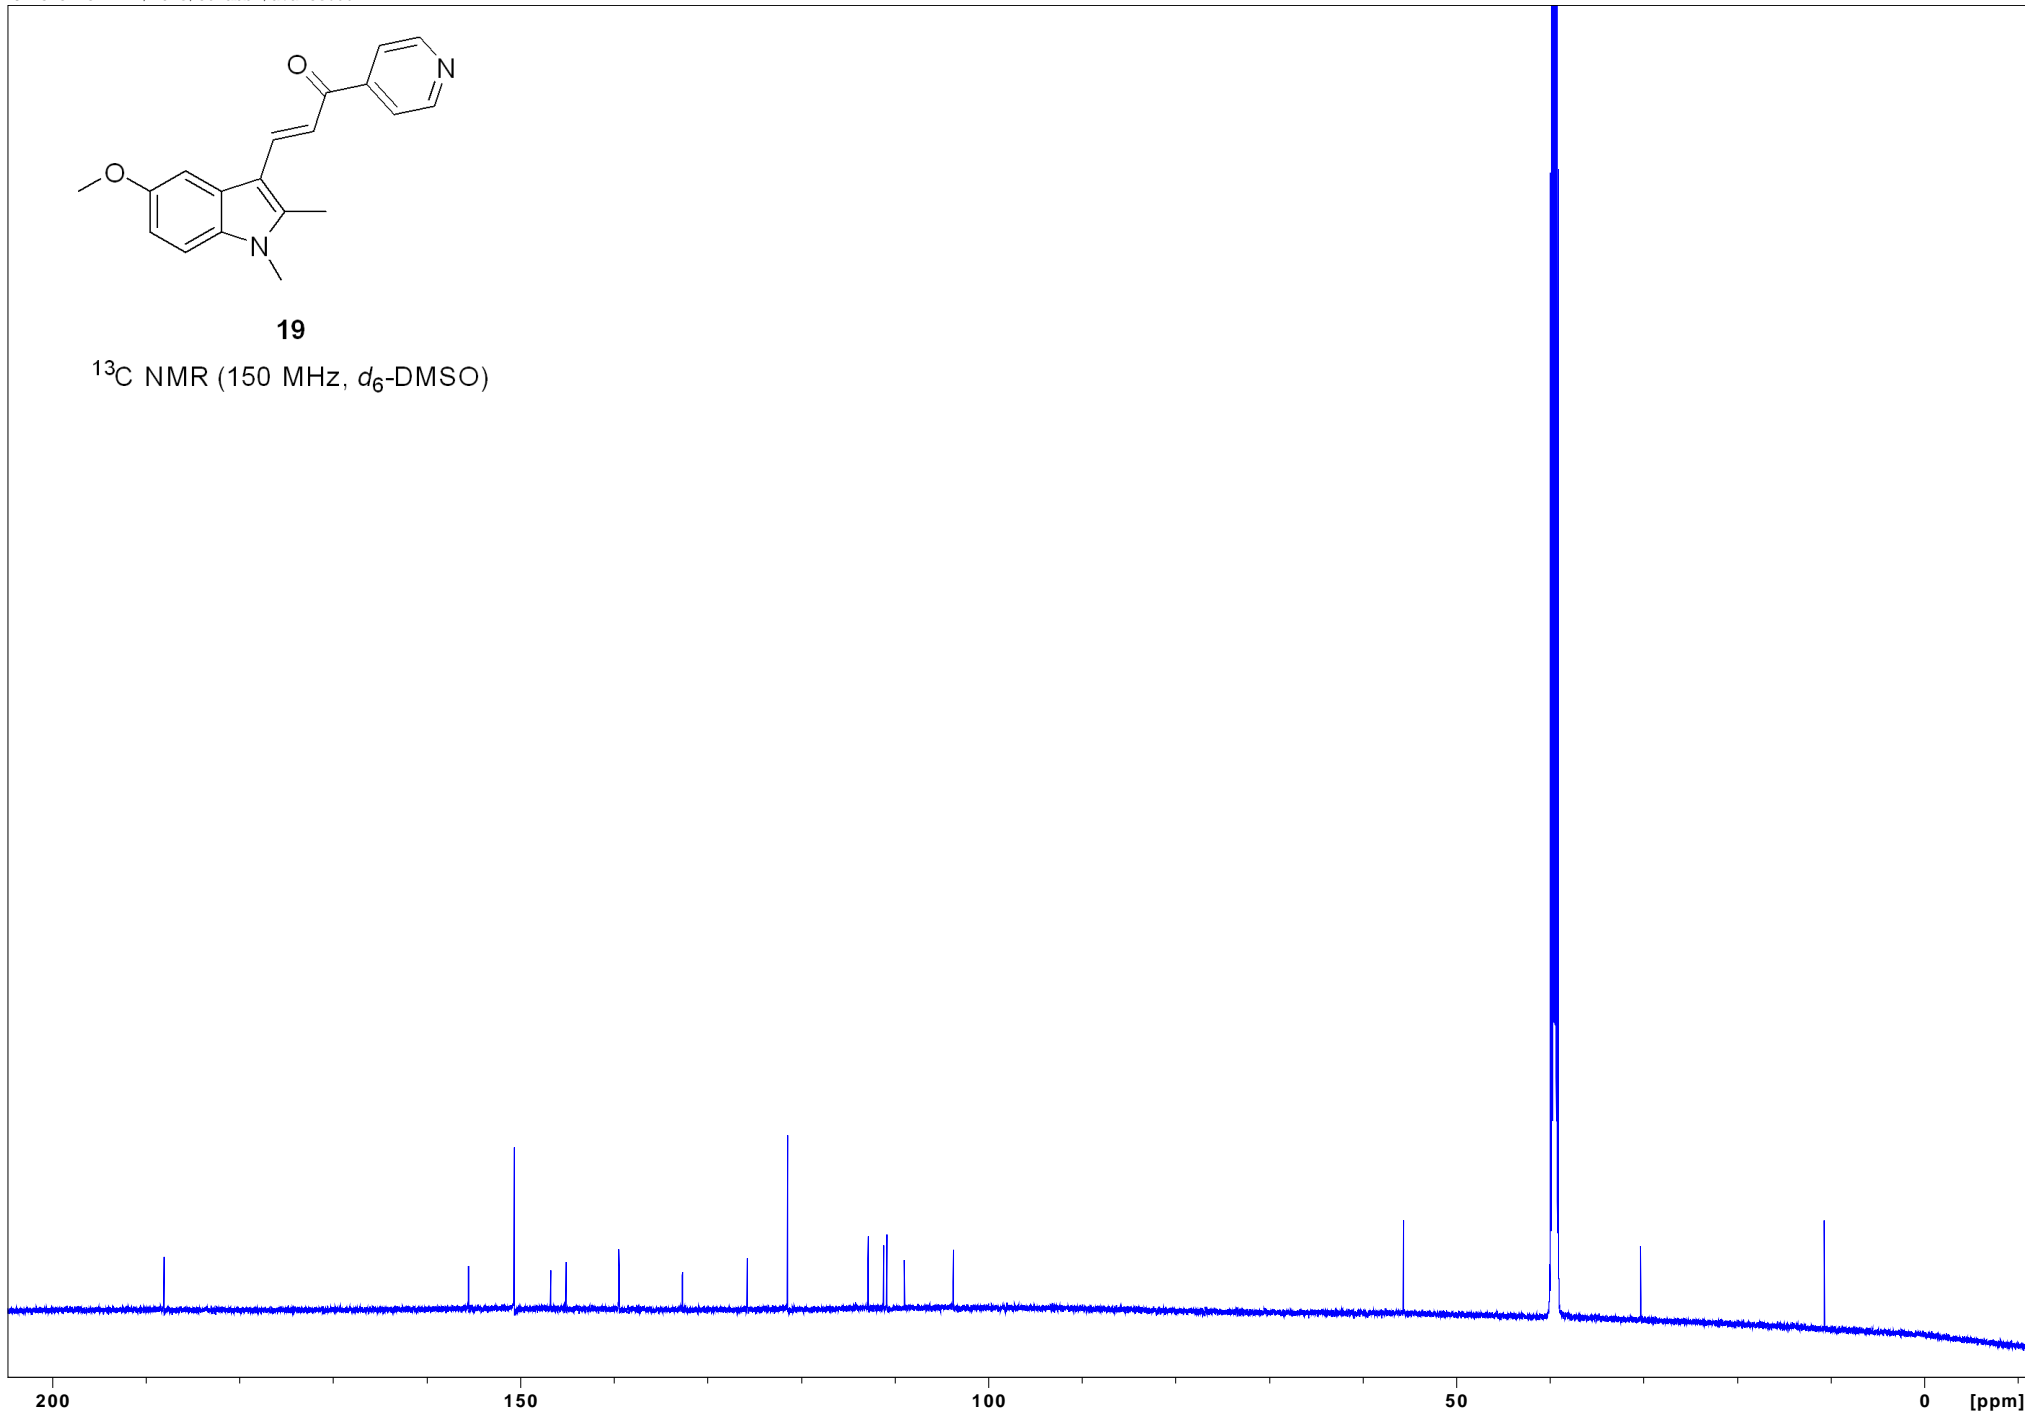

Supplement: NIHMS797982-supplement.pdf [file NIHMS797982-supplement.pdf]
